# Supplementary material for: Epidemiological trends of subarachnoid hemorrhage at global, regional, and national level: a trend analysis study from 1990 to 2021
Source: PubMed Central journal article supplement (PMC11241879; doi:10.1186/s40779-024-00551-6), 2024-07-11
Supplement: 40779_2024_551_MOESM1_ESM.pdf [file 40779_2024_551_MOESM1_ESM.pdf]

**Table S1** Global Burden of Disease Study risk hierarchy with levels

---

| <b>Risk</b>                         | <b>Level</b> |
|-------------------------------------|--------------|
| All risk factors                    | 0            |
| Environmental or occupational risks | 1            |
| Particulate matter pollution        | 3            |
| High temperature                    | 3            |
| Low temperature                     | 3            |
| Lead exposure                       | 3            |
| Behavioral risks                    | 1            |
| Tobacco                             | 2            |
| Smoking                             | 3            |
| Secondhand smoke exposure           | 3            |
| Dietary risks                       | 2            |
| Diet low in fruits                  | 3            |
| Diet low in vegetables              | 3            |
| Diet high in red meat               | 3            |
| Diet low in fiber                   | 3            |
| Diet high in sodium                 | 3            |
| Metabolic risks                     | 1            |
| High systolic blood pressure        | 2            |
| High body mass index                | 2            |

---

**Table S2** Definition of all risk factors

| <b>All risk factor</b>              | <b>Definition</b>                                                                                                                                                                                                                                                                                                                                                                                                                                                                                                                                                                                                                |
|-------------------------------------|----------------------------------------------------------------------------------------------------------------------------------------------------------------------------------------------------------------------------------------------------------------------------------------------------------------------------------------------------------------------------------------------------------------------------------------------------------------------------------------------------------------------------------------------------------------------------------------------------------------------------------|
| Environmental or occupational risks |                                                                                                                                                                                                                                                                                                                                                                                                                                                                                                                                                                                                                                  |
| Particulate matter pollution        | Including ambient particulate matter pollution and household air pollution from solid fuels. Exposure to ambient particulate matter pollution is defined as the population-weighted annual average mass concentration of particles with an aerodynamic diameter of less than 2.5 micrometers (PM2.5) in a cubic meter of air. Exposure to household air pollution from solid fuels is estimated from both the proportion of individuals using solid cooking fuels and the level of PM2.5 air pollution exposure for these individuals. Solid fuels in our analysis include coal, wood, charcoal, dung, and agricultural residues |
| High temperature                    | Theoretical minimum risk exposure level (TMREL) for temperature is associated with the lowest overall mortality attributable to the risk, in a given location and year. Given varying exposure-response curves for different mean annual temperature zones, as well as spatially and temporally varying cause compositions, the Global Burden of Disease Study (GBD) estimates TMRELS by year and location and does not use a globally uniform TMREL. High temperature (heat) exposure is defined as exposure to temperatures warmer than this TMREL                                                                             |
| Low temperature                     | Low temperature (cold) is defined as temperatures colder than the TMREL                                                                                                                                                                                                                                                                                                                                                                                                                                                                                                                                                          |
| Lead exposure                       | Exposure to lead is defined in two different ways according to the currently known pathways of attributable health loss. Acute lead exposure, measured as micrograms of lead per deciliter of blood ( $\mu\text{g}/\text{dl}$ ), is associated with IQ loss in children. Chronic lead exposure, measured as micrograms of lead per gram of bone ( $\mu\text{g}/\text{g}$ ), is associated with increased systolic blood pressure and cardiovascular diseases                                                                                                                                                                     |
| Behavioral risks                    |                                                                                                                                                                                                                                                                                                                                                                                                                                                                                                                                                                                                                                  |
| Tobacco                             |                                                                                                                                                                                                                                                                                                                                                                                                                                                                                                                                                                                                                                  |
| Smoking                             | Including current smoking of any tobacco product and former smoking of any tobacco product                                                                                                                                                                                                                                                                                                                                                                                                                                                                                                                                       |

| All risk factor              | Definition                                                                                                                                                                                                                                                            |
|------------------------------|-----------------------------------------------------------------------------------------------------------------------------------------------------------------------------------------------------------------------------------------------------------------------|
| Secondhand smoke exposure    | Secondhand smoke exposure is defined as current exposure to secondhand tobacco smoke at home, at work, or in other public places. Only non-smokers are considered to be exposed to secondhand smoke. Non-smokers are defined as all persons who are not daily smokers |
| Dietary risk                 |                                                                                                                                                                                                                                                                       |
| Diet low in fiber            | Average daily consumption (g/d) of less than 21 – 22 g of fiber from all sources including fruits, vegetables, grains, legumes, and pulses                                                                                                                            |
| Diet low in vegetables       | Average daily consumption (g/d) of less than 280 – 320 g of vegetables, including fresh, frozen, cooked, canned, or dried vegetables and excluding legumes and salted or pickled vegetables, juices, nuts and seeds, and starchy vegetables such as potatoes or corn  |
| Diet high in sodium          | Average 24-hour urinary sodium excretion (g/d) greater than 1 – 5 g                                                                                                                                                                                                   |
| Diet high in red meat        | Any intake (g/d) of red meat including beef, pork, lamb, and goat but excluding poultry, fish, eggs, and all processed meats                                                                                                                                          |
| Diet low in fruits           | Diet low in fruits of fruits including fresh, frozen, cooked, canned, or dried fruit, excluding fruit juices and salted or pickled fruits                                                                                                                             |
| Metabolic risks              |                                                                                                                                                                                                                                                                       |
| High systolic blood pressure | Brachial systolic blood pressure in mmHg. A TMREL of $\geq 110$ to 115 mmHg, which is the level of exposure that minimizes risk at the population level                                                                                                               |
| High body mass index (BMI)   | High BMI for adults (age > 20 years) is defined as BMI greater than 20 to 25 kg/m <sup>2</sup><br>High BMI for children (ages 1 – 19 years) is defined as being overweight or obese based on International Obesity Task Force standards                               |

**Table S3** Regional incidence, deaths, and DALYs of subarachnoid hemorrhage (SAH) in 2021

| Location                   | Incidence/1000 (95% UI)     |                          |                          | Deaths/1000 (95% UI)      |                          |                          | DALYs/1000 (95% UI)            |                               |                               |
|----------------------------|-----------------------------|--------------------------|--------------------------|---------------------------|--------------------------|--------------------------|--------------------------------|-------------------------------|-------------------------------|
|                            | Both                        | Male                     | Female                   | Both                      | Male                     | Female                   | Both                           | Male                          | Female                        |
| Andean Latin America       | 7.84<br>(7.00 – 8.78)       | 3.45<br>(3.07 – 3.90)    | 4.39<br>(3.90 – 4.93)    | 3.64<br>(2.95 – 4.43)     | 1.51<br>(1.19 – 1.88)    | 2.13<br>(1.71 – 2.65)    | 126.53<br>(105.43 – 151.58)    | 56.34<br>(45.28 – 68.83)      | 70.19<br>(57.77 – 85.59)      |
| Australasia                | 2.63<br>(2.33 – 2.99)       | 1.06<br>(0.93 – 1.20)    | 1.57<br>(1.38 – 1.80)    | 1.32<br>(1.16 – 1.43)     | 0.56<br>(0.51 – 0.62)    | 0.76<br>(0.64 – 0.84)    | 33.26<br>(30.72 – 35.75)       | 14.40<br>(13.35 – 15.51)      | 18.86<br>(17.10 – 20.63)      |
| Caribbean                  | 5.33<br>(4.78 – 6.04)       | 2.17<br>(1.93 – 2.47)    | 3.15<br>(2.82 – 3.58)    | 2.63<br>(2.04 – 3.28)     | 1.08<br>(0.79 – 1.47)    | 1.54<br>(1.12 – 1.96)    | 96.28<br>(73.56 – 118.61)      | 39.34<br>(28.85 – 51.25)      | 56.93<br>(38.73 – 72.70)      |
| Central Asia               | 7.81<br>(6.96 – 8.73)       | 4.16<br>(3.67 – 4.65)    | 3.66<br>(3.25 – 4.09)    | 4.01<br>(3.65 – 4.45)     | 2.15<br>(1.92 – 2.42)    | 1.86<br>(1.66 – 2.07)    | 125.92<br>(112.90 – 139.77)    | 72.13<br>(64.53 – 81.10)      | 53.79<br>(47.98 – 60.02)      |
| Central Europe             | 12.71<br>(11.52 – 13.98)    | 5.76<br>(5.18 – 6.42)    | 6.96<br>(6.35 – 7.63)    | 7.01<br>(6.43 – 7.56)     | 3.07<br>(2.82 – 3.34)    | 3.94<br>(3.56 – 4.30)    | 189.36<br>(174.64 – 203.80)    | 89.78<br>(82.17 – 97.81)      | 99.57<br>(91.12 – 108.47)     |
| Central Latin America      | 28.47<br>(25.35 – 32.27)    | 11.56<br>(10.24 – 13.13) | 16.91<br>(15.12 – 19.24) | 11.95<br>(10.60 – 13.37)  | 5.11<br>(4.47 – 5.80)    | 6.83<br>(5.97 – 7.78)    | 392.19<br>(350.31 – 440.36)    | 174.96<br>(154.32 – 198.84)   | 217.23<br>(190.86 – 247.26)   |
| Central Sub-Saharan Africa | 6.07<br>(5.22 – 7.07)       | 3.43<br>(2.91 – 4.02)    | 2.64<br>(2.25 – 3.09)    | 1.85<br>(0.77 – 5.03)     | 1.06<br>(0.26 – 4.17)    | 0.78<br>(0.44 – 1.87)    | 74.84<br>(37.07 – 182.35)      | 44.13<br>(14.95 – 145.97)     | 30.71<br>(19.42 – 64.51)      |
| East Asia                  | 151.82<br>(131.56 – 176.50) | 82.14<br>(70.43 – 96.92) | 69.68<br>(60.57 – 80.45) | 95.18<br>(70.28 – 119.16) | 50.64<br>(30.87 – 70.57) | 44.54<br>(31.32 – 59.61) | 2396.95<br>(1840.65 – 2934.11) | 1307.40<br>(847.93 – 1754.93) | 1089.56<br>(810.77 – 1419.54) |
| Eastern Europe             | 27.74<br>(24.53 – 31.83)    | 13.40<br>(11.73 – 15.51) | 14.34<br>(12.69 – 16.37) | 18.20<br>(16.68 – 19.69)  | 8.18<br>(7.35 – 8.97)    | 10.02<br>(8.90 – 11.14)  | 494.66<br>(457.05 – 532.54)    | 256.52<br>(231.13 – 281.82)   | 238.13<br>(212.91 – 263.19)   |

|                                  |                             |                          |                          |                          |                          |                          |                                |                               |                               |
|----------------------------------|-----------------------------|--------------------------|--------------------------|--------------------------|--------------------------|--------------------------|--------------------------------|-------------------------------|-------------------------------|
| Eastern Sub-Saharan Africa       | 18.58<br>(15.96 – 21.45)    | 10.93<br>(9.38 – 12.64)  | 7.65<br>(6.52 – 8.89)    | 5.58<br>(2.11 – 15.46)   | 3.62<br>(0.94 – 13.16)   | 1.96<br>(1.06 – 5.13)    | 234.78<br>(105.03 – 589.27)    | 152.97<br>(50.76 – 499.79)    | 81.81<br>(49.95 – 182.04)     |
| High-income Asia Pacific         | 46.62<br>(41.13 – 53.65)    | 17.29<br>(15.06 – 20.07) | 29.33<br>(25.57 – 33.76) | 17.74<br>(14.89 – 19.54) | 6.69<br>(6.19 – 7.08)    | 11.05<br>(8.63 – 12.55)  | 485.22<br>(434.13 – 531.78)    | 211.94<br>(197.05 – 228.01)   | 273.28<br>(235.95 – 305.76)   |
| High-income North America        | 33.65<br>(29.72 – 38.72)    | 13.84<br>(12.16 – 15.87) | 19.81<br>(17.34 – 22.99) | 19.71<br>(17.78 – 20.83) | 8.15<br>(7.57 – 8.56)    | 11.55<br>(10.12 – 12.38) | 525.52<br>(495.26 – 554.72)    | 221.87<br>(210.94 – 233.29)   | 303.64<br>(281.13 – 323.38)   |
| North Africa and the Middle East | 32.39<br>(28.11 – 36.31)    | 15.73<br>(13.71 – 17.73) | 16.65<br>(14.35 – 18.73) | 12.26<br>(9.70 – 15.97)  | 6.20<br>(4.46 – 9.03)    | 6.06<br>(4.51 – 8.06)    | 433.90<br>(351.65 – 547.03)    | 218.84<br>(165.02 – 305.76)   | 215.07<br>(168 – 279.83)      |
| Oceania                          | 1.27<br>(1.12 – 1.42)       | 0.64<br>(0.57 – 0.73)    | 0.62<br>(0.56 – 0.70)    | 0.70<br>(0.50 – 0.96)    | 0.34<br>(0.20 – 0.57)    | 0.36<br>(0.25 – 0.50)    | 31.04<br>(23.60 – 40.11)       | 15.80<br>(10.33 – 24.52)      | 15.24<br>(10.95 – 20.24)      |
| South Asia                       | 140.53<br>(120.48 – 162.71) | 75.53<br>(64.40 – 87.75) | 65.01<br>(56.02 – 75.42) | 67.62<br>(48.40 – 93.44) | 37.65<br>(18.61 – 61.30) | 29.97<br>(22.66 – 41.56) | 2362.78<br>(1772.14 – 3126.99) | 1334.95<br>(738.77 – 2034.90) | 1027.82<br>(797.12 – 1375.85) |
| Southeast Asia                   | 74.81<br>(65.47 – 85.58)    | 36.53<br>(31.77 – 41.88) | 38.28<br>(33.65 – 44.15) | 37.58<br>(31.54 – 51.34) | 18.06<br>(13.81 – 26.90) | 19.52<br>(15.20 – 28.72) | 1279.43<br>(1094.27 – 1636.99) | 658.43<br>(521.73 – 918.62)   | 621.01<br>(499.52 – 832.12)   |
| Southern Latin America           | 8.42<br>(7.55 – 9.48)       | 3.29<br>(2.95 – 3.73)    | 5.12<br>(4.55 – 5.84)    | 3.52<br>(3.25 – 3.75)    | 1.53<br>(1.41 – 1.64)    | 1.99<br>(1.81 – 2.14)    | 108.16<br>(101.03 – 114.85)    | 48.41<br>(44.85 – 51.99)      | 59.75<br>(55.28 – 64.18)      |
| Southern Sub-Saharan Africa      | 3.59<br>(3.11 – 4.14)       | 1.73<br>(1.49 – 1.98)    | 1.86<br>(1.61 – 2.19)    | 1.22<br>(1.01 – 1.57)    | 0.59<br>(0.45 – 0.84)    | 0.63<br>(0.51 – 0.78)    | 47.01<br>(39.29 – 58.93)       | 24.07<br>(18.84 – 33.54)      | 22.94<br>(18.89 – 27.48)      |
| Tropical Latin America           | 26.00<br>(22.46 – 30.29)    | 10.22<br>(8.80 – 11.87)  | 15.78<br>(13.58 – 18.43) | 14.03<br>(13.23 – 14.63) | 5.33<br>(5.06 – 5.61)    | 8.71<br>(8.01 – 9.18)    | 460.76<br>(440.24 – 479.16)    | 178.07<br>(169.66 – 186.85)   | 282.69<br>(267.25 – 296.22)   |
| Western Europe                   | 43.95<br>(39.40 – 49.55)    | 18.63<br>(16.41 – 20.98) | 25.32<br>(22.68 – 28.70) | 21.91<br>(19.17 – 23.40) | 9.27<br>(8.57 – 9.74)    | 12.65<br>(10.70 – 13.74) | 511.25<br>(473.46 – 544.42)    | 226.36<br>(212.89 – 240.12)   | 284.89<br>(258.23 – 305.67)   |

|                               |                          |                        |                       |                        |                       |                       |                             |                            |                           |
|-------------------------------|--------------------------|------------------------|-----------------------|------------------------|-----------------------|-----------------------|-----------------------------|----------------------------|---------------------------|
| Western Sub-Saharan<br>Africa | 17.26<br>(14.76 – 19.80) | 9.35<br>(8.02 – 10.73) | 7.91<br>(6.70 – 9.10) | 5.15<br>(2.60 – 11.59) | 2.94<br>(0.99 – 9.23) | 2.21<br>(1.44 – 4.61) | 232.05<br>(137.19 – 464.76) | 136.74<br>(62.36 – 370.48) | 95.31<br>(67.70 – 171.76) |
|-------------------------------|--------------------------|------------------------|-----------------------|------------------------|-----------------------|-----------------------|-----------------------------|----------------------------|---------------------------|

---

*DALYs* disability-adjusted life-years, *UI* uncertainty interval

**Table S4** ASIR, ASMR, and ASDR for subarachnoid hemorrhage (SAH) in 21 regions in 2021

| Location                   | ASIR/100,000 persons (95% UI) |                         |                          | ASMR/100,000 persons (95% UI) |                        |                       | ASDR /100,000 persons (95% UI) |                             |                             |
|----------------------------|-------------------------------|-------------------------|--------------------------|-------------------------------|------------------------|-----------------------|--------------------------------|-----------------------------|-----------------------------|
|                            | Both                          | Male                    | Female                   | Both                          | Male                   | Female                | Both                           | Male                        | Female                      |
| Andean Latin America       | 12.29<br>(11.04 – 13.73)      | 11.02<br>(9.82 – 12.43) | 13.48<br>(12.02 – 15.11) | 6.01<br>(4.87 – 7.29)         | 5.16<br>(4.05 – 6.38)  | 6.77<br>(5.46 – 8.40) | 199.49<br>(166.06 – 238.99)    | 179.70<br>(144.13 – 220.19) | 217.34<br>(179.04 – 264.63) |
| Australasia                | 6.06<br>(5.34 – 6.86)         | 5.15<br>(4.51 – 5.83)   | 6.94<br>(6.04 – 7.94)    | 2.48<br>(2.22 – 2.68)         | 2.37<br>(2.16 – 2.58)  | 2.59<br>(2.27 – 2.83) | 73.27<br>(68.07 – 78.65)       | 67.75<br>(63.05 – 72.85)    | 78.37<br>(71.78 – 85.49)    |
| Caribbean                  | 10.40<br>(9.34 – 11.71)       | 8.82<br>(7.86 – 9.97)   | 11.93<br>(10.65 – 13.47) | 5.02<br>(3.88 – 6.25)         | 4.37<br>(3.17 – 5.88)  | 5.64<br>(3.99 – 7.19) | 191.37<br>(146.14 – 234.04)    | 160.79<br>(117.34 – 206.86) | 220.85<br>(146.49 – 283.13) |
| Central Asia               | 8.97<br>(8.10 – 9.98)         | 10.20<br>(9.17 – 11.31) | 7.86<br>(7.04 – 8.77)    | 5.20<br>(4.73 – 5.76)         | 6.30<br>(5.68 – 7.06)  | 4.32<br>(3.86 – 4.81) | 143.22<br>(129.04 – 158.53)    | 176.40<br>(158.86 – 197.43) | 114.41<br>(102.27 – 127.13) |
| Central Europe             | 7.27<br>(6.55 – 8.02)         | 7.46<br>(6.67 – 8.26)   | 7.15<br>(6.39 – 7.92)    | 3.39<br>(3.11 – 3.65)         | 3.54<br>(3.25 – 3.85)  | 3.24<br>(2.93 – 3.55) | 106.16<br>(97.77 – 114.30)     | 110.43<br>(101.11 – 120.26) | 101.77<br>(93.08 – 110.76)  |
| Central Latin America      | 11.07<br>(9.92 – 12.51)       | 9.59<br>(8.50 – 10.84)  | 12.40<br>(11.13 – 14.08) | 4.76<br>(4.22 – 5.31)         | 4.40<br>(3.85 – 4.98)  | 5.05<br>(4.41 – 5.74) | 151.45<br>(135.49 – 170.06)    | 143<br>(126.16 – 162.59)    | 158.25<br>(139.19 – 180.17) |
| Central Sub-Saharan Africa | 7.29<br>(6.26 – 8.51)         | 8.58<br>(7.36 – 10.06)  | 6.22<br>(5.32 – 7.35)    | 3.15<br>(1.24 – 8.95)         | 3.97<br>(0.87 – 16.73) | 2.55<br>(1.38 – 6.28) | 99.08<br>(47.49 – 248.36)      | 120.36<br>(37.58 – 445.13)  | 80.51<br>(49.44 – 175.09)   |
| East Asia                  | 7.89<br>(6.94 – 9.03)         | 8.84<br>(7.73 – 10.20)  | 7.05<br>(6.16 – 8.03)    | 4.71<br>(3.49 – 5.87)         | 5.62<br>(3.37 – 7.77)  | 4.03<br>(2.84 – 5.41) | 116.37<br>(89.68 – 141.75)     | 133.76<br>(86.14 – 178.88)  | 100.87<br>(76.37 – 130.67)  |
| Eastern Europe             | 9.59<br>(8.42 – 10.87)        | 11.19<br>(9.80 – 12.78) | 8.22<br>(7.22 – 9.36)    | 5.49<br>(5.03 – 5.93)         | 6.54<br>(5.90 – 7.16)  | 4.62<br>(4.12 – 5.14) | 162.91<br>(150.36 – 175.08)    | 200.83<br>(181.05 – 220.18) | 130.59<br>(116 – 144.77)    |

|                                  |                          |                          |                          |                        |                        |                        |                             |                             |                             |
|----------------------------------|--------------------------|--------------------------|--------------------------|------------------------|------------------------|------------------------|-----------------------------|-----------------------------|-----------------------------|
| Eastern Sub-Saharan Africa       | 7.25<br>(6.25 – 8.62)    | 8.77<br>(7.54 – 10.31)   | 5.89<br>(5.05 – 6.94)    | 2.92<br>(1.10 – 8.24)  | 3.95<br>(0.98 – 15.05) | 2.03<br>(1.07 – 5.46)  | 96.66<br>(42.93 – 245.35)   | 127.42<br>(41.61 – 429.22)  | 68.25<br>(41.18 – 161.60)   |
| High-income Asia Pacific         | 14.09<br>(12.30 – 16.39) | 11.93<br>(10.22 – 13.76) | 15.95<br>(13.81 – 18.66) | 3.90<br>(3.48 – 4.20)  | 3.73<br>(3.49 – 3.96)  | 3.88<br>(3.28 – 4.29)  | 135.70<br>(124.59 – 146.65) | 136.84<br>(128.08 – 146.82) | 131.39<br>(118.46 – 144.12) |
| High-income North America        | 6.37<br>(5.56 – 7.31)    | 5.62<br>(4.94 – 6.39)    | 7.15<br>(6.21 – 8.28)    | 3.15<br>(2.87 – 3.31)  | 2.97<br>(2.77 – 3.13)  | 3.30<br>(2.98 – 3.50)  | 97.81<br>(92.56 – 103.14)   | 89.40<br>(84.76 – 94)       | 105.46<br>(99 – 112.12)     |
| North Africa and the Middle East | 5.96<br>(5.27 – 6.66)    | 5.75<br>(5.10 – 6.44)    | 6.22<br>(5.50 – 7.01)    | 2.85<br>(2.28 – 3.69)  | 2.84<br>(1.99 – 4.13)  | 2.86<br>(2.15 – 3.77)  | 82.79<br>(67.60 – 104.61)   | 81.08<br>(60.92 – 113.57)   | 84.64<br>(65.68 – 109.65)   |
| Oceania                          | 12.52<br>(11.25 – 13.97) | 11.55<br>(10.35 – 13.11) | 13.50<br>(12.10 – 15.08) | 8.61<br>(6.03 – 11.95) | 7.23<br>(4.18 – 12.80) | 9.96<br>(6.78 – 14.27) | 285.62<br>(209.42 – 379.65) | 269.77<br>(173 – 436.66)    | 302.38<br>(215.65 – 404.09) |
| South Asia                       | 8.44<br>(7.33 – 9.75)    | 9.12<br>(7.90 – 10.50)   | 7.80<br>(6.74 – 9.05)    | 4.47<br>(3.14 – 6.23)  | 5.09<br>(2.47 – 8.35)  | 3.90<br>(2.94 – 5.49)  | 142.60<br>(106.78 – 189.60) | 161.16<br>(87.73 – 248.39)  | 124.34<br>(96.59 – 166.87)  |
| Southeast Asia                   | 10.89<br>(9.66 – 12.36)  | 11.12<br>(9.82 – 12.61)  | 10.70<br>(9.47 – 12.16)  | 6.02<br>(5.02 – 8.42)  | 6.00<br>(4.56 – 9.23)  | 5.91<br>(4.61 – 8.95)  | 182.03<br>(155.77 – 235.86) | 190.48<br>(151.77 – 268.36) | 171.75<br>(138.38 – 232.82) |
| Southern Latin America           | 10.65<br>(9.51 – 11.93)  | 9.01<br>(8.10 – 10.17)   | 12.17<br>(10.73 – 13.85) | 4.13<br>(3.82 – 4.39)  | 4.12<br>(3.80 – 4.43)  | 4.17<br>(3.81 – 4.48)  | 134.19<br>(125.36 – 142.61) | 129.99<br>(120.33 – 139.57) | 138.22<br>(128.30 – 148.36) |
| Southern Sub-Saharan Africa      | 5.26<br>(4.59 – 6.10)    | 5.53<br>(4.83 – 6.36)    | 5.07<br>(4.37 – 5.91)    | 2.05<br>(1.70 – 2.62)  | 2.24<br>(1.72 – 3.16)  | 1.89<br>(1.53 – 2.34)  | 69.35<br>(58.45 – 86.11)    | 76.17<br>(60.43 – 104.79)   | 63.05<br>(52.41 – 75.64)    |
| Tropical Latin America           | 10.21<br>(8.88 – 11.79)  | 8.66<br>(7.50 – 10.00)   | 11.66<br>(10.10 – 13.57) | 5.45<br>(5.12 – 5.68)  | 4.61<br>(4.35 – 4.87)  | 6.20<br>(5.71 – 6.53)  | 177.53<br>(169.49 – 184.75) | 147.03<br>(140.10 – 154.33) | 204.92<br>(194.01 – 214.57) |
| Western Europe                   | 6.31<br>(5.57 – 7.13)    | 5.81<br>(5.15 – 6.54)    | 6.81<br>(5.94 – 7.75)    | 2.28<br>(2.07 – 2.41)  | 2.28<br>(2.14 – 2.39)  | 2.29<br>(2.05 – 2.45)  | 67.75<br>(63.56 – 71.94)    | 65.66<br>(62.01 – 69.54)    | 69.78<br>(64.68 – 74.36)    |



|                            |                       |                       |                       |                       |                       |                       |                           |                           |                           |
|----------------------------|-----------------------|-----------------------|-----------------------|-----------------------|-----------------------|-----------------------|---------------------------|---------------------------|---------------------------|
| Western Sub-Saharan Africa | 5.00<br>(4.34 – 5.84) | 5.64<br>(4.87 – 6.54) | 4.42<br>(3.79 – 5.16) | 2.22<br>(1.12 – 5.09) | 2.51<br>(0.76 – 8.51) | 1.95<br>(1.26 – 4.38) | 77.81<br>(44.39 – 161.92) | 91.73<br>(37.43 – 266.26) | 65.08<br>(45.87 – 124.61) |
|----------------------------|-----------------------|-----------------------|-----------------------|-----------------------|-----------------------|-----------------------|---------------------------|---------------------------|---------------------------|

---

*ASIR* age-standardized incidence rate, *ASMR* age-standardized mortality rate, *ASDR* age-standardized disability-adjusted life-year rate, *UI* uncertainty interval

**Table S5** EAPC of ASIR, ASMR, and ASDR for subarachnoid hemorrhage (SAH) in 21 regions from 1990 to 2021

| Location                   | EAPC of ASIR (95% CI)     |                           |                           | EAPC of ASMR (95% CI)     |                           |                           | EAPC of ASDR (95% CI)     |                           |                           |
|----------------------------|---------------------------|---------------------------|---------------------------|---------------------------|---------------------------|---------------------------|---------------------------|---------------------------|---------------------------|
|                            | Both                      | Male                      | Female                    | Both                      | Male                      | Female                    | Both                      | Male                      | Female                    |
| Andean Latin America       | -0.99<br>(-1.05 to -0.93) | -0.89<br>(-0.96 to -0.82) | -1.07<br>(-1.13 to -1.01) | -1.03<br>(-1.18 to -0.88) | -1.10<br>(-1.25 to -0.96) | -0.98<br>(-1.15 to -0.82) | -1.32<br>(-1.45 to -1.19) | -1.33<br>(-1.44 to -1.21) | -1.32<br>(-1.47 to -1.16) |
| Australasia                | -0.80<br>(-0.85 to -0.76) | -0.60<br>(-0.65 to -0.54) | -0.92<br>(-0.96 to -0.87) | -1.96<br>(-2.06 to -1.85) | -1.47<br>(-1.63 to -1.31) | -2.24<br>(-2.34 to -2.15) | -2.16<br>(-2.24 to -2.08) | -1.91<br>(-2.04 to -1.79) | -2.32<br>(-2.40 to -2.25) |
| Caribbean                  | -0.43<br>(-0.50 to -0.37) | -0.34<br>(-0.40 to -0.27) | -0.50<br>(-0.56 to -0.43) | -0.75<br>(-0.87 to -0.64) | -0.76<br>(-0.91 to -0.61) | -0.75<br>(-0.84 to -0.65) | -0.67<br>(-0.80 to -0.53) | -0.72<br>(-0.89 to -0.55) | -0.63<br>(-0.74 to -0.51) |
| Central Asia               | -0.05<br>(-0.09 to -0.02) | 0.03<br>(-0.01 to 0.08)   | -0.19<br>(-0.21 to -0.16) | 0.54<br>(0.33 – 0.75)     | 0.55<br>(0.34 – 0.77)     | 0.41<br>(0.21 – 0.61)     | -0.05<br>(-0.21 to 0.12)  | 0.15<br>(-0.04 to 0.33)   | -0.34<br>(-0.50 to -0.18) |
| Central Europe             | -1.14<br>(-1.23 to -1.04) | -0.95<br>(-1.03 to -0.87) | -1.30<br>(-1.41 to -1.19) | -1.65<br>(-1.91 to -1.38) | -1.43<br>(-1.65 to -1.22) | -1.84<br>(-2.14 to -1.54) | -2.00<br>(-2.23 to -1.76) | -1.79<br>(-1.99 to -1.59) | -2.19<br>(-2.45 to -1.92) |
| Central Latin America      | -0.28<br>(-0.30 to -0.25) | -0.12<br>(-0.14 to -0.10) | -0.41<br>(-0.44 to -0.38) | 0.40<br>(0.26 – 0.54)     | 0.76<br>(0.63 – 0.90)     | 0.11<br>(-0.04 to 0.26)   | -0.02<br>(-0.10 to 0.06)  | 0.37<br>(0.29 to 0.45)    | -0.33<br>(-0.42 to -0.25) |
| Central Sub-Saharan Africa | -0.25<br>(-0.29 to -0.22) | -0.20<br>(-0.24 to -0.17) | -0.26<br>(-0.31 to -0.22) | -0.48<br>(-0.56 to -0.41) | -0.37<br>(-0.47 to -0.26) | -0.50<br>(-0.58 to -0.42) | -0.57<br>(-0.63 to -0.51) | -0.47<br>(-0.55 to -0.39) | -0.69<br>(-0.76 to -0.62) |
| East Asia                  | -3.60<br>(-3.97 to -3.22) | -3.62<br>(-4.04 to -3.19) | -3.60<br>(-3.92 to -3.28) | -6.56<br>(-7.21 to -5.91) | -6.01<br>(-6.56 to -5.45) | -7.13<br>(-7.87 to -6.39) | -6.17<br>(-6.76 to -5.57) | -5.71<br>(-6.24 to -5.18) | -6.70<br>(-7.36 to -6.03) |
| Eastern Europe             | -0.27<br>(-0.52 to -0.02) | -0.24<br>(-0.46 to -0.03) | -0.36<br>(-0.63 to -0.09) | -0.72<br>(-1.65 to 0.22)  | -0.77<br>(-1.62 to 0.09)  | -0.77<br>(-1.76 to 0.23)  | -0.74<br>(-1.46 to -0.02) | -0.71<br>(-1.42 to -0.01) | -0.82<br>(-1.56 to -0.08) |

|                                  |                           |                           |                           |                           |                           |                           |                           |                           |                           |
|----------------------------------|---------------------------|---------------------------|---------------------------|---------------------------|---------------------------|---------------------------|---------------------------|---------------------------|---------------------------|
| Eastern Sub-Saharan Africa       | -0.90<br>(-0.97 to -0.83) | -0.77<br>(-0.84 to -0.70) | -1.02<br>(-1.10 to -0.95) | -1.55<br>(-1.61 to -1.50) | -1.62<br>(-1.69 to -1.55) | -1.29<br>(-1.36 to -1.22) | -1.44<br>(-1.50 to -1.39) | -1.47<br>(-1.53 to -1.41) | -1.32<br>(-1.39 to -1.25) |
| High-income Asia Pacific         | -0.73<br>(-0.80 to -0.66) | -0.54<br>(-0.60 to -0.48) | -0.77<br>(-0.86 to -0.69) | -2.90<br>(-3.00 to -2.80) | -2.44<br>(-2.55 to -2.32) | -3.21<br>(-3.31 to -3.11) | -2.54<br>(-2.60 to -2.47) | -2.25<br>(-2.33 to -2.18) | -2.75<br>(-2.83 to -2.68) |
| High-income North America        | -0.55<br>(-0.72 to -0.37) | -0.17<br>(-0.34 to 0.01)  | -0.77<br>(-0.94 to -0.60) | -0.58<br>(-0.73 to -0.43) | 0.10<br>(-0.09 to 0.29)   | -0.97<br>(-1.12 to -0.82) | -1.01<br>(-1.11 to -0.92) | -0.53<br>(-0.62 to -0.44) | -1.32<br>(-1.43 to -1.21) |
| North Africa and the Middle East | -1.54<br>(-1.63 to -1.44) | -1.59<br>(-1.69 to -1.48) | -1.49<br>(-1.59 to -1.39) | -2.61<br>(-2.75 to -2.48) | -3.08<br>(-3.22 to -2.95) | -2.11<br>(-2.25 to -1.97) | -2.90<br>(-3.01 to -2.79) | -3.22<br>(-3.34 to -3.09) | -2.56<br>(-2.66 to -2.46) |
| Oceania                          | -0.70<br>(-0.74 to -0.65) | -0.56<br>(-0.60 to -0.51) | -0.79<br>(-0.84 to -0.73) | -1.21<br>(-1.25 to -1.18) | -1.13<br>(-1.20 to -1.06) | -1.23<br>(-1.27 to -1.20) | -1.05<br>(-1.08 to -1.02) | -0.97<br>(-1.02 to -0.92) | -1.10<br>(-1.16 to -1.04) |
| South Asia                       | -1.12<br>(-1.23 to -1.02) | -1.00<br>(-1.10 to -0.91) | -1.22<br>(-1.35 to -1.10) | -1.38<br>(-1.43 to -1.33) | -1.50<br>(-1.56 to -1.45) | -1.10<br>(-1.19 to -1.01) | -1.35<br>(-1.39 to -1.30) | -1.45<br>(-1.50 to -1.39) | -1.13<br>(-1.22 to -1.05) |
| Southeast Asia                   | -0.89<br>(-0.96 to -0.82) | -0.81<br>(-0.87 to -0.75) | -0.98<br>(-1.06 to -0.90) | -1.46<br>(-1.54 to -1.37) | -1.42<br>(-1.49 to -1.36) | -1.52<br>(-1.63 to -1.41) | -1.39<br>(-1.46 to -1.32) | -1.29<br>(-1.35 to -1.22) | -1.53<br>(-1.61 to -1.45) |
| Southern Latin America           | -1.52<br>(-1.64 to -1.40) | -1.44<br>(-1.57 to -1.32) | -1.56<br>(-1.68 to -1.44) | -2.68<br>(-2.90 to -2.46) | -2.79<br>(-3.09 to -2.48) | -2.57<br>(-2.74 to -2.40) | -2.85<br>(-3.02 to -2.67) | -3.03<br>(-3.27 to -2.78) | -2.68<br>(-2.82 to -2.55) |
| Southern Sub-Saharan Africa      | -0.41<br>(-0.52 to -0.30) | -0.39<br>(-0.51 to -0.28) | -0.44<br>(-0.54 to -0.34) | 0.67<br>(0.28 – 1.05)     | 0.22<br>(-0.16 to 0.61)   | 1.11<br>(0.68 – 1.54)     | 0.50<br>(0.16 – 0.84)     | 0.20<br>(-0.15 to 0.54)   | 0.79<br>(0.40 – 1.18)     |
| Tropical Latin America           | -1.36<br>(-1.51 to -1.22) | -1.25<br>(-1.37 to -1.14) | -1.45<br>(-1.62 to -1.28) | -1.06<br>(-1.26 to -0.85) | -1.02<br>(-1.18 to -0.87) | -1.09<br>(-1.32 to -0.85) | -1.64<br>(-1.82 to -1.47) | -1.69<br>(-1.82 to -1.57) | -1.62<br>(-1.83 to -1.42) |
| Western Europe                   | -0.90<br>(-0.95 to -0.85) | -0.76<br>(-0.79 to -0.72) | -0.99<br>(-1.05 to -0.92) | -1.51<br>(-1.71 to -1.31) | -0.97<br>(-1.20 to -0.75) | -1.80<br>(-1.99 to -1.60) | -1.96<br>(-2.11 to -1.81) | -1.71<br>(-1.86 to -1.55) | -2.12<br>(-2.27 to -1.97) |

|                            |                           |                           |                           |                           |                           |                           |                           |                           |                           |
|----------------------------|---------------------------|---------------------------|---------------------------|---------------------------|---------------------------|---------------------------|---------------------------|---------------------------|---------------------------|
| Western Sub-Saharan Africa | -0.81<br>(-0.89 to -0.73) | -0.84<br>(-0.93 to -0.76) | -0.74<br>(-0.81 to -0.67) | -1.33<br>(-1.43 to -1.22) | -1.43<br>(-1.55 to -1.30) | -1.08<br>(-1.16 to -1.00) | -1.17<br>(-1.27 to -1.07) | -1.18<br>(-1.29 to -1.06) | -1.01<br>(-1.09 to -0.93) |
|----------------------------|---------------------------|---------------------------|---------------------------|---------------------------|---------------------------|---------------------------|---------------------------|---------------------------|---------------------------|

---

*ASIR* age-standardized incidence rate, *ASMR* age-standardized mortality rate, *ASDR* age-standardized disability-adjusted life-year rate, *EAPC* estimated annual percentage change, *CI* confidence interval

**Table S6** Incidence, deaths, and DALYs for subarachnoid hemorrhage (SAH) in 204 countries in 2021

| Location            | Incidence/1000 (95% UI)        |                                |                                | Deaths/1000 (95% UI)         |                             |                             | DALYs/1000 (95% UI)                  |                                    |                                    |
|---------------------|--------------------------------|--------------------------------|--------------------------------|------------------------------|-----------------------------|-----------------------------|--------------------------------------|------------------------------------|------------------------------------|
|                     | Both                           | Male                           | Female                         | Both                         | Male                        | Female                      | Both                                 | Male                               | Female                             |
| Afghanistan         | 1534.69<br>(1346.32 – 1740.13) | 738.04<br>(646.36 – 848.88)    | 796.65<br>(692.76 – 901.91)    | 726.21<br>(382.74 – 1212.60) | 398.67<br>(147.65 – 798.81) | 327.54<br>(86.58 – 546.25)  | 30,687.15<br>(17,825.55 – 48,511.74) | 16,726.01<br>(7414.32 – 30,588.86) | 13,961.15<br>(4594.91 – 21,617.64) |
| Albania             | 241.98<br>(214.00 – 270.70)    | 118.13<br>(102.89 – 133.91)    | 123.84<br>(109.02 – 138.97)    | 100.75<br>(65.32 – 139.88)   | 43.34<br>(24.69 – 67.97)    | 57.41<br>(35.17 – 85.89)    | 2576.29<br>(1882.52 – 3418.90)       | 1165.76<br>(752.12 – 1730.49)      | 1410.53<br>(959.27 – 2042.66)      |
| Algeria             | 2541.09<br>(2187.15 – 2873.71) | 1219.34<br>(1065.49 – 1383.66) | 1321.75<br>(1130.05 – 1527.35) | 795.2<br>(511.96 – 1218.69)  | 351.25<br>(196.45 – 643.40) | 443.95<br>(261.77 – 753.62) | 26,647.75<br>(18,742.46 – 38,755.54) | 11,457.38<br>(7112.93 – 19,498.49) | 15,190.37<br>(9940.56 – 23,765.15) |
| American Samoa      | 5.46<br>(4.86 – 6.11)          | 2.60<br>(2.29 – 2.97)          | 2.85<br>(2.52 – 3.23)          | 2.68<br>(2.13 – 3.42)        | 1.17<br>(0.86 – 1.61)       | 1.51<br>(1.14 – 1.98)       | 100.16<br>(80.00 – 124.59)           | 50.21<br>(37.94 – 67.24)           | 49.95<br>(39.18 – 63.36)           |
| Andorra             | 7.97<br>(6.90 – 9.27)          | 3.33<br>(2.80 – 3.99)          | 4.64<br>(4.01 – 5.32)          | 2.82<br>(1.91 – 3.82)        | 0.84<br>(0.48 – 1.22)       | 1.98<br>(1.26 – 2.81)       | 80.50<br>(59.00 – 106.41)            | 26.97<br>(18.12 – 36.78)           | 53.53<br>(37.68 – 72.52)           |
| Angola              | 1209.00<br>(1026.82 – 1391.51) | 638.85<br>(541.36 – 739.74)    | 570.15<br>(482.74 – 671.57)    | 360.18<br>(188.29 – 662.81)  | 198.22<br>(76.48 – 468.68)  | 161.96<br>(99.96 – 323.00)  | 15,347.95<br>(9101.51 – 26,373.12)   | 8572.31<br>(4057.64 – 18,167.82)   | 6775.63<br>(4646.16 – 12,111.82)   |
| Antigua and Barbuda | 10.59<br>(9.28 – 11.85)        | 4.56<br>(3.97 – 5.17)          | 6.04<br>(5.27 – 6.96)          | 4.13<br>(3.82 – 4.47)        | 1.92<br>(1.72 – 2.15)       | 2.21<br>(2.02 – 2.41)       | 127.99<br>(119.32 – 137.72)          | 58.04<br>(52.48 – 64.09)           | 69.95<br>(64.53 – 76.66)           |

|            |                                      |                                      |                                |                                    |                                  |                                |                                         |                                         |                                        |
|------------|--------------------------------------|--------------------------------------|--------------------------------|------------------------------------|----------------------------------|--------------------------------|-----------------------------------------|-----------------------------------------|----------------------------------------|
| Argentina  | 5583.39<br>(4971.78 – 6303.69)       | 2257.11<br>(2013.02 – 2567.39)       | 3326.29<br>(2941.57 – 3810.99) | 2218.52<br>(2029.62 – 2373.98)     | 992.73<br>(904.02 – 1073.41)     | 1225.79<br>(1105.00 – 1337.87) | 70,009.21<br>(64,857.55 – 74,938.90)    | 31,946.86<br>(29,332.83 – 34,772.48)    | 38,062.35<br>(35,051.50 – 41,502.46)   |
| Armenia    | 225.86<br>(200.57 – 252.96)          | 115.31<br>(102.23 – 128.49)          | 110.55<br>(95.86 – 125.56)     | 97.76<br>(87.19 – 110.31)          | 51.58<br>(45.73 – 57.88)         | 46.18<br>(40.28 – 52.53)       | 2816.67<br>(2508.63 – 3187.89)          | 1608.29<br>(1433.74 – 1799.42)          | 1208.38<br>(1059.20 – 1384.55)         |
| Australia  | 2226.4<br>(1969.18 – 2538.89)        | 896.86<br>(792.03 – 1020.74)         | 1329.54<br>(1164.55 – 1523.66) | 1,080.42<br>(946.80 – 1,178.80)    | 465.68<br>(419.55 – 511.93)      | 614.74<br>(519.50 – 680.09)    | 26,840.85<br>(24,677.84 – 28,931.76)    | 11,667.59<br>(10,770.69 – 12,592.48)    | 15,173.25<br>(13,697.92 – 16,676.88)   |
| Austria    | 1239.61<br>(1072.25 – 1429.03)       | 534.28<br>(450.36 – 626.70)          | 705.33<br>(601.43 – 809.97)    | 424.91<br>(370.90 – 467.94)        | 167.42<br>(149.16 – 184.12)      | 257.49<br>(214.74 – 290.00)    | 11,325.27<br>(10,132.50 – 12,465.83)    | 4692.03<br>(4221.14 – 5190.59)          | 6633.24<br>(5865.52 – 7393.10)         |
| Azerbaijan | 621.77<br>(525.01 – 725.82)          | 313.51<br>(261.83 – 367.61)          | 308.26<br>(260.38 – 361.68)    | 106.49<br>(69.91 – 151.97)         | 51.60<br>(28.42 – 84.08)         | 54.89<br>(30.27 – 89.57)       | 4441.45<br>(3319.27 – 5866.28)          | 2214.17<br>(1446.23 – 3263.91)          | 2227.28<br>(1580.99 – 3159.14)         |
| Bahamas    | 37.39<br>(32.96 – 42.04)             | 15.69<br>(13.75 – 17.77)             | 21.71<br>(18.80 – 24.72)       | 13.91<br>(11.29 – 17.24)           | 6.41<br>(5.17 – 8.07)            | 7.51<br>(6.13 – 9.32)          | 508.89<br>(417.00 – 625.22)             | 237.12<br>(193.13 – 297.46)             | 271.77<br>(221.21 – 333.00)            |
| Bahrain    | 61.62<br>(50.68 – 72.58)             | 37.65<br>(30.46 – 45.28)             | 23.97<br>(19.98 – 27.96)       | 14.60<br>(10.93 – 18.91)           | 8.19<br>(5.15 – 12.13)           | 6.41<br>(4.79 – 8.89)          | 621.90<br>(492.22 – 776.68)             | 368.41<br>(265.36 – 501.27)             | 253.5<br>(202.46 – 324.96)             |
| Bangladesh | 19,095.71<br>(16,867.10 – 21,923.94) | 11,460.58<br>(10,055.90 – 13,152.99) | 7635.13<br>(6619.94 – 8856.16) | 10,874.09<br>(6356.78 – 18,041.40) | 6455.33<br>(2757.30 – 13,618.49) | 4418.76<br>(2852.19 – 7457.33) | 368,375.40<br>(234,653.89 – 583,507.42) | 228,644.86<br>(113,471.13 – 447,747.29) | 139,730.53<br>(93,452.44 – 214,920.84) |

|                                                   |                                |                             |                              |                              |                             |                             |                                      |                                    |                                      |
|---------------------------------------------------|--------------------------------|-----------------------------|------------------------------|------------------------------|-----------------------------|-----------------------------|--------------------------------------|------------------------------------|--------------------------------------|
| Barbados                                          | 41.43<br>(37.17 – 47.17)       | 18.94<br>(16.81 – 21.65)    | 22.50<br>(19.74 – 26.11)     | 22.70<br>(18.17 – 28.06)     | 10.70<br>(8.40 – 13.50)     | 12.00<br>(9.52 – 14.85)     | 637.16<br>(505.37 – 786.19)          | 301.62<br>(237.57 – 382.77)        | 335.53<br>(266.25 – 421.53)          |
| Belarus                                           | 948.23<br>(848.85 – 1062.92)   | 430.12<br>(379.75 – 491.20) | 518.12<br>(461.43 – 588.71)  | 594.21<br>(483.06 – 706.86)  | 298.31<br>(240.66 – 362.74) | 295.9<br>(242.46 – 347.37)  | 17,141.25<br>(14,053.93 – 20,345.71) | 9644.88<br>(7766.08 – 11,681.48)   | 7496.36<br>(6192.45 – 8777.40)       |
| Belgium                                           | 1027.04<br>(912.00 – 1175.85)  | 441.87<br>(388.83 – 502.42) | 585.17<br>(515.18 – 675.66)  | 547.68<br>(476.41 – 595.53)  | 245.16<br>(222.49 – 267.45) | 302.53<br>(250.01 – 341.68) | 12,760.85<br>(11,780.47 – 13,743.24) | 5806.30<br>(5400.21 – 6259.55)     | 6954.55<br>(6218.15 – 7682.58)       |
| Belize                                            | 31.25<br>(27.67 – 35.01)       | 13.61<br>(11.98 – 15.27)    | 17.64<br>(15.40 – 20.03)     | 8.85<br>(7.72 – 10.04)       | 4.13<br>(3.52 – 4.79)       | 4.72<br>(4.13 – 5.35)       | 337.81<br>(298.01 – 380.55)          | 159.25<br>(136.56 – 183.49)        | 178.56<br>(157.76 – 202.68)          |
| Benin                                             | 490.32<br>(418.39 – 564.59)    | 270.83<br>(230.12 – 310.82) | 219.49<br>(185.52 – 255.04)  | 149.97<br>(69.63 – 349.43)   | 77.02<br>(22.57 – 276.13)   | 72.95<br>(42.53 – 159.00)   | 6294.81<br>(3449.82 – 13,226.78)     | 3409.75<br>(1363.27 – 10,381.75)   | 2885.06<br>(1885.61 – 5501.21)       |
| Bermuda                                           | 7.96<br>(6.97 – 9.13)          | 3.73<br>(3.28 – 4.23)       | 4.23<br>(3.60 – 4.95)        | 2.91<br>(2.46 – 3.50)        | 1.79<br>(1.51 – 2.16)       | 1.12<br>(0.92 – 1.40)       | 80.13<br>(68.64 – 94.44)             | 47.20<br>(39.85 – 56.52)           | 32.93<br>(27.70 – 39.25)             |
| Bhutan                                            | 52.68<br>(45.26 – 59.98)       | 28.21<br>(23.81 – 32.32)    | 24.47<br>(21.31 – 28.11)     | 22.72<br>(14.88 – 34.83)     | 11.56<br>(5.89 – 21.67)     | 11.17<br>(7.15 – 17.24)     | 765.87<br>(521.57 – 1149.23)         | 399.33<br>(222.01 – 714.35)        | 366.55<br>(243.59 – 547.94)          |
| Bolivia<br>(Plurinational<br>State of<br>Bolivia) | 1485.15<br>(1316.35 – 1663.76) | 602.13<br>(528.21 – 680.27) | 883.02<br>(776.94 – 1005.11) | 908.85<br>(645.45 – 1276.17) | 323.48<br>(213.10 – 460.45) | 585.37<br>(391.67 – 847.71) | 31,155.19<br>(22,888.72 – 42,571.15) | 12,114.64<br>(8469.69 – 16,879.53) | 19,040.55<br>(13,242.16 – 27,117.94) |

|                        |                                      |                                  |                                      |                                      |                                |                                |                                         |                                         |                                         |
|------------------------|--------------------------------------|----------------------------------|--------------------------------------|--------------------------------------|--------------------------------|--------------------------------|-----------------------------------------|-----------------------------------------|-----------------------------------------|
| Bosnia and Herzegovina | 387.15<br>(350.53 – 428.06)          | 170.42<br>(152.79 – 191.76)      | 216.73<br>(195.01 – 241.56)          | 189.92<br>(137.96 – 245.51)          | 81.51<br>(53.72 – 116.24)      | 108.41<br>(76.79 – 143.66)     | 5279.04<br>(3928.97 – 6756.72)          | 2385.51<br>(1639.57 – 3315.24)          | 2893.53<br>(2157.05 – 3694.58)          |
| Botswana               | 109.51<br>(93.28 – 127.77)           | 54.27<br>(46.12 – 63.99)         | 55.24<br>(46.95 – 64.65)             | 19.89<br>(12.90 – 34.14)             | 10.61<br>(6.10 – 22.69)        | 9.27<br>(6.30 – 17.95)         | 848.54<br>(596.71 – 1352.76)            | 465.84<br>(288.38 – 942.09)             | 382.70<br>(285.78 – 648.23)             |
| Brazil                 | 25,289.74<br>(21,783.79 – 29,544.03) | 9913.47<br>(8525.51 – 11,539.22) | 15,376.27<br>(13,197.96 – 17,973.86) | 13,700.99<br>(12,895.32 – 14,272.27) | 5197.85<br>(4929.47 – 5474.60) | 8503.14<br>(7848.01 – 8962.32) | 449,297.39<br>(429,646.53 – 466,339.18) | 173,468.00<br>(165,104.63 – 182,237.62) | 275,829.40<br>(260,962.04 – 289,177.31) |
| Brunei Darussalam      | 67.29<br>(58.61 – 78.59)             | 29.46<br>(24.83 – 34.73)         | 37.83<br>(32.72 – 44.07)             | 26.11<br>(21.25 – 31.69)             | 11.47<br>(8.59 – 15.63)        | 14.64<br>(11.52 – 18.18)       | 989.43<br>(829.81 – 1186.82)            | 475.80<br>(366.38 – 634.94)             | 513.62<br>(419.75 – 626.85)             |
| Bulgaria               | 900.42<br>(823.04 – 985.29)          | 424.60<br>(379.65 – 473.98)      | 475.83<br>(433.10 – 522.10)          | 663.10<br>(573.34 – 760.56)          | 308.64<br>(262.41 – 358.95)    | 354.46<br>(307.88 – 408.26)    | 16,938.38<br>(14,548.43 – 19,524.05)    | 8457.08<br>(7145.78 – 9956.06)          | 8481.30<br>(7293.11 – 9748.48)          |
| Burkina Faso           | 797.22<br>(686.89 – 911.74)          | 426.53<br>(365.07 – 494.39)      | 370.69<br>(316.01 – 425.39)          | 233.70<br>(89.04 – 585.63)           | 154.15<br>(40.05 – 501.27)     | 79.55<br>(43.22 – 182.02)      | 10,137.66<br>(4992.22 – 21,931.44)      | 6573.35<br>(2472.70 – 18,119.68)        | 3564.31<br>(2338.34 – 6716.83)          |
| Burundi                | 605.39<br>(519.10 – 699.64)          | 367.74<br>(312.62 – 430.59)      | 237.65<br>(202.37 – 275.96)          | 204.74<br>(49.21 – 724.39)           | 141.11<br>(20.35 – 645.76)     | 63.63<br>(25.93 – 201.84)      | 8501.31<br>(2814.36 – 26,543.67)        | 5721.83<br>(1284.41 – 23,229.58)        | 2779.47<br>(1395.60 – 7367.05)          |
| Côte d'Ivoire          | 1007.65<br>(863.30 – 1152.43)        | 589.03<br>(502.64 – 677.97)      | 418.62<br>(352.38 – 484.32)          | 343.66<br>(167.20 – 736.84)          | 215.30<br>(79.10 – 631.36)     | 128.36<br>(79.60 – 259.47)     | 15,993.22<br>(9038.23 – 30,972.89)      | 10,269.55<br>(4,749.09 – 25,989.22)     | 5723.67<br>(3934.85 – 10,388.23)        |



|                          |                                         |                                      |                                      |                                       |                                      |                                      |                                               |                                             |                                             |
|--------------------------|-----------------------------------------|--------------------------------------|--------------------------------------|---------------------------------------|--------------------------------------|--------------------------------------|-----------------------------------------------|---------------------------------------------|---------------------------------------------|
| Cabo Verde               | 27.25<br>(22.66 – 31.99)                | 14.12<br>(11.87 – 16.54)             | 13.12<br>(10.72 – 15.64)             | 7.89<br>(3.78 – 18.51)                | 4.38<br>(1.52 – 14.75)               | 3.52<br>(1.90 – 8.78)                | 321.98<br>(183.28 – 709.37)                   | 189.85<br>(79.96 – 559.29)                  | 132.13<br>(87.32 – 272.94)                  |
| Cambodia                 | 1495.21<br>(1316.14 – 1692.35)          | 642.81<br>(558.54 – 732.18)          | 852.4<br>(745.30 – 980.75)           | 670.52<br>(475.42 – 1044.27)          | 265.93<br>(173.33 – 463.71)          | 404.59<br>(278.92 – 663.58)          | 22,819.02<br>(16,681.61 – 32,966.48)          | 9900.94<br>(6617.30 – 15,783.85)            | 12,918.08<br>(9404.47 – 18,509.05)          |
| Cameroon                 | 1151.84<br>(983.63 – 1335.44)           | 644.29<br>(554.35 – 753.86)          | 507.56<br>(426.56 – 585.11)          | 424.55<br>(190.87 – 908.65)           | 252.84<br>(81.50 – 718.56)           | 171.71<br>(97.50 – 362.22)           | 19,001.32<br>(9624.58 – 37,450.38)            | 11,631.00<br>(4733.27 – 28,972.28)          | 7370.32<br>(4677.30 – 14,064.42)            |
| Canada                   | 3883.29<br>(3430.04 – 4441.58)          | 1527.50<br>(1344.13 – 1781.08)       | 2355.79<br>(2049.18 – 2721.29)       | 1655.34<br>(1460.06 – 1800.31)        | 679.43<br>(611.19 – 743.55)          | 975.91<br>(843.82 – 1078.03)         | 44,084.87<br>(40,485.46 – 47,579.39)          | 18,448.62<br>(16,862.28 – 20,014.60)        | 25,636.25<br>(23,152.68 – 28,023.40)        |
| Central African Republic | 252.19<br>(214.88 – 296.86)             | 139.28<br>(118.43 – 164.99)          | 112.91<br>(95.48 – 134.23)           | 111.33<br>(40.86 – 250.56)            | 68.47<br>(16.77 – 197.88)            | 42.86<br>(17.88 – 103.79)            | 4610.71<br>(1,987.36 – 9,667.42)              | 2894.89<br>(921.30 – 7528.10)               | 1715.81<br>(816.38 – 3775.54)               |
| Chad                     | 642.34<br>(548.22 – 735.13)             | 366.69<br>(309.26 – 422.18)          | 275.65<br>(233.34 – 318.31)          | 250.43<br>(105.47 – 583.27)           | 152.09<br>(44.82 – 493.70)           | 98.34<br>(55.17 – 206.54)            | 11,576.82<br>(5842.51 – 24,324.68)            | 7199.74<br>(2840.87 – 19,688.17)            | 4377.08<br>(2646.51 – 8547.62)              |
| Chile                    | 2225.08<br>(1960.75 – 2514.83)          | 823.95<br>(704.14 – 940.47)          | 1401.13<br>(1230.65 – 1609.24)       | 948.87<br>(873.77 – 1023.39)          | 407.49<br>(374.01 – 445.52)          | 541.38<br>(486.52 – 592.99)          | 28,538.95<br>(26,750.13 – 30,664.66)          | 12,624.98<br>(11,585.62 – 13,669.74)        | 15,913.97<br>(14,700.59 – 17,290.18)        |
| China                    | 145,138.48<br>(125,425.42 – 169,016.38) | 78,990.17<br>(67,566.71 – 93,431.54) | 66,148.31<br>(57,391.10 – 76,476.82) | 91,802.18<br>(66,671.88 – 116,215.44) | 49,084.73<br>(29,036.95 – 69,317.92) | 42,717.45<br>(29,206.73 – 57,848.12) | 2,296,534.29<br>(1,727,441.71 – 2,847,370.05) | 1,257,996.98<br>(796,778.55 – 1,713,591.99) | 1,038,537.31<br>(752,194.25 – 1,367,867.96) |

|              |                                |                                |                                |                                |                                |                                |                                        |                                      |                                      |
|--------------|--------------------------------|--------------------------------|--------------------------------|--------------------------------|--------------------------------|--------------------------------|----------------------------------------|--------------------------------------|--------------------------------------|
| Colombia     | 7570.42<br>(6798.04 – 8534.63) | 2963.21<br>(2613.97 – 3368.20) | 4607.21<br>(4061.30 – 5229.22) | 3353.40<br>(2803.39 – 3960.97) | 1346.94<br>(1103.01 – 1620.52) | 2006.46<br>(1678.32 – 2368.03) | 100,436.71<br>(84,643.23 – 118,485.56) | 42,007.44<br>(34,912.91 – 50,038.55) | 58,429.27<br>(49,326.05 – 68,039.44) |
| Comoros      | 44.52<br>(38.29 – 52.36)       | 24.96<br>(21.42 – 29.27)       | 19.56<br>(16.51 – 23.33)       | 13.36<br>(5.37 – 31.44)        | 7.66<br>(1.79 – 25.28)         | 5.70<br>(2.91 – 13.47)         | 522.13<br>(253.76 – 1121.88)           | 301.41<br>(96.66 – 860.28)           | 220.72<br>(135.24 – 450.93)          |
| Congo        | 243.97<br>(206.70 – 283.01)    | 130.45<br>(109.31 – 152.54)    | 113.52<br>(96.16 – 133.28)     | 79.72<br>(42.28 – 151.51)      | 39.06<br>(14.36 – 100.59)      | 40.66<br>(24.79 – 81.97)       | 3248.73<br>(1906.14 – 5801.05)         | 1642.77<br>(742.45 – 3799.42)        | 1605.96<br>(1032.74 – 3009.24)       |
| Cook Islands | 2.03<br>(1.79 – 2.29)          | 0.90<br>(0.78 – 1.03)          | 1.13<br>(0.99 – 1.30)          | 0.66<br>(0.43 – 0.91)          | 0.29<br>(0.17 – 0.42)          | 0.37<br>(0.22 – 0.57)          | 24.30<br>(18.41 – 31.25)               | 12.26<br>(8.38 – 16.61)              | 12.04<br>(8.74 – 16.79)              |
| Costa Rica   | 541.04<br>(470.49 – 616.01)    | 223.81<br>(194.45 – 259.67)    | 317.24<br>(271.76 – 365.50)    | 199.87<br>(173.33 – 221.37)    | 91.18<br>(78.80 – 101.29)      | 108.69<br>(93.54 – 123.30)     | 6377.41<br>(5673.36 – 6991.35)         | 2940.34<br>(2597.87 – 3264.89)       | 3437.07<br>(3019.20 – 3827.41)       |
| Croatia      | 391.58<br>(355.45 – 430.61)    | 166.98<br>(148.01 – 186.92)    | 224.61<br>(202.91 – 250.16)    | 299.23<br>(261.30 – 342.72)    | 125.39<br>(108.45 – 145.28)    | 173.85<br>(149.93 – 200.25)    | 6910.34<br>(6053.79 – 7851.17)         | 3152.29<br>(2752.72 – 3609.86)       | 3758.05<br>(3268.47 – 4316.02)       |
| Cuba         | 1277.57<br>(1126.31 – 1483.76) | 532.28<br>(462.68 – 614.61)    | 745.29<br>(647.08 – 885.30)    | 522.16<br>(447.07 – 593.85)    | 226.63<br>(191.61 – 265.65)    | 295.53<br>(251.79 – 340.17)    | 15,520.54<br>(13,536.87 – 17,518.75)   | 6823.75<br>(5845.03 – 7944.13)       | 8696.79<br>(7543.08 – 9988.83)       |
| Cyprus       | 123.44<br>(107.89 – 141.82)    | 55.39<br>(47.74 – 63.99)       | 68.05<br>(59.28 – 78.82)       | 47.63<br>(37.64 – 60.37)       | 20.47<br>(15.17 – 27.35)       | 27.16<br>(19.72 – 35.68)       | 1257.64<br>(1044.79 – 1519.86)         | 577.12<br>(449.97 – 742.20)          | 680.52<br>(550.89 – 837.90)          |

|                                       |                                |                                |                                |                                |                               |                               |                                       |                                      |                                      |
|---------------------------------------|--------------------------------|--------------------------------|--------------------------------|--------------------------------|-------------------------------|-------------------------------|---------------------------------------|--------------------------------------|--------------------------------------|
| Czechia                               | 956.85<br>(857.03 – 1066.05)   | 442.83<br>(390.44 – 501.67)    | 514.02<br>(457.20 – 577.20)    | 468.27<br>(410.44 – 534.55)    | 200.42<br>(173.03 – 231.36)   | 267.85<br>(230.91 – 305.71)   | 12,536.82<br>(11,056.17 – 14,366.04)  | 5617.56<br>(4855.15 – 6403.30)       | 6919.26<br>(6096.78 – 7966.28)       |
| Democratic People's Republic of Korea | 3649.43<br>(3191.87 – 4137.08) | 1760.99<br>(1506.72 – 2020.88) | 1888.44<br>(1650.58 – 2138.23) | 2432.33<br>(1456.97 – 4474.06) | 1088.50<br>(568.55 – 2634.69) | 1343.83<br>(828.80 – 2263.13) | 70,875.16<br>(44,787.01 – 120,722.57) | 34,729.55<br>(19,668.47 – 75,677.75) | 36,145.61<br>(23,362.41 – 56,933.53) |
| Democratic Republic of the Congo      | 4234.42<br>(3629.78 – 4964.34) | 2453.87<br>(2070.42 – 2882.92) | 1780.55<br>(1508.62 – 2091.37) | 1264.46<br>(431.66 – 4110.64)  | 741.74<br>(132.03 – 3424.99)  | 522.72<br>(250.35 – 1424.84)  | 50,353.05<br>(21,957.53 – 144,645.63) | 30,300.82<br>(8499.10 – 117,111.30)  | 20,052.23<br>(11,458.62 – 46,588.35) |
| Denmark                               | 654.66<br>(576.88 – 748.18)    | 277.89<br>(237.85 – 321.76)    | 376.77<br>(330.78 – 435.87)    | 326.15<br>(290.61 – 354.04)    | 135.13<br>(120.36 – 147.84)   | 191.02<br>(165.64 – 211.12)   | 7589.44<br>(6947.78 – 8132.83)        | 3287.72<br>(2951.11 – 3573.46)       | 4301.72<br>(3925.10 – 4713.80)       |
| Djibouti                              | 71.71<br>(60.61 – 84.62)       | 45.01<br>(38.18 – 53.18)       | 26.70<br>(22.07 – 32.07)       | 20.22<br>(7.92 – 45.13)        | 14.48<br>(4.43 – 39.44)       | 5.74<br>(2.92 – 13.24)        | 856.1<br>(390.85 – 1773.94)           | 613.07<br>(226.20 – 1530.53)         | 243.03<br>(144.23 – 489.18)          |
| Dominica                              | 6.85<br>(6.00 – 7.82)          | 3.31<br>(2.88 – 3.80)          | 3.54<br>(3.10 – 4.06)          | 3.59<br>(2.91 – 4.39)          | 1.87<br>(1.39 – 2.47)         | 1.72<br>(1.35 – 2.17)         | 110.06<br>(90.83 – 135.01)            | 58.91<br>(45.15 – 76.36)             | 51.15<br>(40.82 – 63.62)             |
| Dominican Republic                    | 1175.47<br>(1037.38 – 1336.76) | 454.90<br>(398.32 – 516.53)    | 720.57<br>(630.60 – 834.72)    | 419.43<br>(309.60 – 548.32)    | 168.76<br>(115.28 – 243.86)   | 250.67<br>(176.49 – 344.26)   | 15,791.69<br>(12,272.54 – 19,934.23)  | 6558.81<br>(4590.79 – 9036.58)       | 9232.89<br>(6820.53 – 12,413.07)     |
| Ecuador                               | 2585.02<br>(2336.50 – 2906.17) | 1127.11<br>(1010.51 – 1281.30) | 1457.90<br>(1292.44 – 1665.69) | 1256.57<br>(1001.49 – 1554.13) | 559.27<br>(436.80 – 722.68)   | 697.30<br>(551.00 – 858.82)   | 40,189.93<br>(32,586.06 – 49,510.92)  | 18,842.19<br>(15,137.10 – 24,110.63) | 21,347.74<br>(17,270.60 – 26,072.77) |

|                      |                                |                                |                                |                                |                              |                              |                                       |                                      |                                      |
|----------------------|--------------------------------|--------------------------------|--------------------------------|--------------------------------|------------------------------|------------------------------|---------------------------------------|--------------------------------------|--------------------------------------|
| Egypt                | 4577.52<br>(3929.51 – 5241.39) | 2178.16<br>(1879.93 – 2477.29) | 2399.36<br>(2046.95 – 2788.90) | 1673.83<br>(1141.50 – 2457.01) | 952.65<br>(608.99 – 1579.00) | 721.18<br>(423.91 – 1229.95) | 64,820.56<br>(47,313.50 – 93,503.97)  | 36,414.82<br>(24,837.36 – 57,734.99) | 28,405.74<br>(18,717.26 – 44,515.53) |
| El Salvador          | 615.97<br>(548.02 – 687.01)    | 227.57<br>(202.25 – 252.40)    | 388.41<br>(343.54 – 442.15)    | 211.64<br>(162.80 – 272.37)    | 76.54<br>(51.19 – 100.42)    | 135.10<br>(97.68 – 177.91)   | 7379.09<br>(5845.32 – 9175.76)        | 2877.37<br>(1933.23 – 3723.98)       | 4501.72<br>(3432.06 – 5759.98)       |
| Equatorial<br>Guinea | 48.70<br>(40.55 – 56.39)       | 27.03<br>(22.29 – 31.59)       | 21.67<br>(18.08 – 25.76)       | 9.39<br>(4.64 – 15.84)         | 4.65<br>(1.94 – 9.62)        | 4.74<br>(2.03 – 9.94)        | 439.98<br>(239.05 – 694.41)           | 231.42<br>(118.90 – 437.71)          | 208.56<br>(111.23 – 391.19)          |
| Eritrea              | 358.22<br>(304.37 – 419.38)    | 197.39<br>(166.07 – 234.38)    | 160.83<br>(135.38 – 191.98)    | 122.80<br>(44.13 – 283.26)     | 78.10<br>(17.94 – 228.85)    | 44.70<br>(23.67 – 103.98)    | 5250.00<br>(2186.24 – 11,402.07)      | 3445.06<br>(1007.82 – 9258.03)       | 1804.95<br>(1059.48 – 3672.18)       |
| Estonia              | 120.72<br>(107.53 – 135.56)    | 55.08<br>(48.35 – 62.12)       | 65.64<br>(57.67 – 74.45)       | 65.96<br>(57.23 – 74.03)       | 32.69<br>(28.47 – 37.41)     | 33.27<br>(27.40 – 37.84)     | 1547.44<br>(1348.79 – 1740.07)        | 872.16<br>(765.68 – 994.00)          | 675.28<br>(573.75 – 760.45)          |
| Eswatini             | 41.82<br>(35.93 – 48.00)       | 21.10<br>(18.14 – 24.39)       | 20.72<br>(17.64 – 24.01)       | 13.79<br>(8.59 – 22.32)        | 7.23<br>(3.92 – 13.00)       | 6.56<br>(3.75 – 10.86)       | 555.25<br>(350.16 – 894.68)           | 309.95<br>(181.44 – 538.58)          | 245.30<br>(154.47 – 388.48)          |
| Ethiopia             | 4,82.1<br>(3638.05 – 4945.19)  | 2615.17<br>(2216.80 – 3021.22) | 1666.93<br>(1409.76 – 1947.82) | 1025.25<br>(344.09 – 3099.83)  | 688.86<br>(140.10 – 2750.00) | 336.39<br>(165.94 – 907.61)  | 42,930.72<br>(18,318.57 – 113,072.26) | 27,930.69<br>(8410.40 – 97,918.73)   | 15,000.03<br>(8720.55 – 34,692.11)   |
| Fiji                 | 132.13<br>(119.02 – 146.39)    | 41.49<br>(36.42 – 46.79)       | 90.64<br>(81.27 – 101.48)      | 53.49<br>(40.36 – 70.99)       | 19.67<br>(14.44 – 27.12)     | 33.82<br>(24.27 – 46.55)     | 2153.70<br>(1687.54 – 2733.81)        | 908.12<br>(691.05 – 1198.08)         | 1245.58<br>(932.44 – 1654.83)        |

|         |                                  |                                |                                |                                |                                |                                |                                        |                                      |                                      |
|---------|----------------------------------|--------------------------------|--------------------------------|--------------------------------|--------------------------------|--------------------------------|----------------------------------------|--------------------------------------|--------------------------------------|
| Finland | 874.77<br>(771.60 – 993.05)      | 373.01<br>(325.63 – 431.42)    | 501.76<br>(440.82 – 574.62)    | 400.34<br>(348.64 – 435.53)    | 168.35<br>(150.87 – 181.76)    | 232.00<br>(195.88 – 258.41)    | 10,567.90<br>(9751.63 – 11,445.02)     | 4810.79<br>(4452.91 – 5169.72)       | 5757.11<br>(5190.55 – 6382.90)       |
| France  | 6760.79<br>(6084.51 – 7534.56)   | 2947.32<br>(2608.71 – 3297.97) | 3813.47<br>(3400.82 – 4323.20) | 3012.92<br>(2631.61 – 3283.36) | 1271.22<br>(1150.52 – 1374.03) | 1741.70<br>(1456.29 – 1939.10) | 72,173.24<br>(65,760.27 – 78,075.55)   | 33,330.30<br>(30,552.33 – 36,217.39) | 38,842.94<br>(34,636.79 – 43,294.27) |
| Gabon   | 83.02<br>(70.44 – 96.40)         | 44.30<br>(37.44 – 52.09)       | 38.73<br>(32.41 – 46.01)       | 21.08<br>(12.11 – 36.50)       | 12.16<br>(5.68 – 25.35)        | 8.92<br>(4.64 – 16.55)         | 836.76<br>(524.55 – 1382.20)           | 489.43<br>(261.80 – 932.80)          | 347.33<br>(217.96 – 582.48)          |
| Gambia  | 85.92<br>(73.49 – 99.39)         | 47.57<br>(40.90 – 55.25)       | 38.35<br>(32.26 – 44.39)       | 35.26<br>(15.22 – 87.20)       | 19.67<br>(5.58 – 71.27)        | 15.59<br>(8.40 – 34.12)        | 1520.21<br>(756.23 – 3556.87)          | 895.81<br>(331.45 – 2862.91)         | 624.40<br>(368.59 – 1223.12)         |
| Georgia | 831.28<br>(760.82 – 912.40)      | 405.80<br>(364.68 – 451.32)    | 425.48<br>(385.70 – 479.11)    | 522.71<br>(431.72 – 616.72)    | 245.80<br>(197.02 – 298.14)    | 276.90<br>(228.86 – 327.11)    | 12,933.66<br>(10,722.33 – 15,161.39)   | 7079.01<br>(5770.19 – 8603.93)       | 5854.66<br>(4875.63 – 6793.77)       |
| Germany | 8638.99<br>(7600.19 – 10,001.42) | 3674.14<br>(3177.88 – 4263.59) | 4964.85<br>(4297.00 – 5792.14) | 4090.89<br>(3540.24 – 4459.91) | 1729.36<br>(1549.33 – 1891.22) | 2361.53<br>(1947.08 – 2631.34) | 103,377.59<br>(94,795.23 – 111,589.09) | 44,721.66<br>(41,165.68 – 48,268.40) | 58,655.93<br>(52,880.17 – 64,151.90) |
| Ghana   | 1569.86<br>(1334.46 – 1,818.74)  | 856.61<br>(730.96 – 995.56)    | 713.25<br>(595.85 – 841.12)    | 625.10<br>(322.94 – 1243.40)   | 340.42<br>(123.63 – 928.25)    | 284.68<br>(173.32 – 553.44)    | 26,770.80<br>(14,853.99 – 50,608.87)   | 15,520.79<br>(6497.14 – 38,995.68)   | 11,250.02<br>(7459.27 – 20,388.40)   |
| Greece  | 1234.24<br>(1093.06 – 1413.49)   | 544.25<br>(472.14 – 621.45)    | 689.99<br>(603.46 – 795.02)    | 702.33<br>(617.77 – 759.86)    | 325.06<br>(293.28 – 353.47)    | 377.27<br>(317.62 – 416.16)    | 16,241.38<br>(15,015.66 – 17,522.97)   | 7945.86<br>(7246.03 – 8565.63)       | 8295.52<br>(7518.93 – 9066.38)       |

|               |                                |                             |                             |                               |                             |                              |                                      |                                    |                                    |
|---------------|--------------------------------|-----------------------------|-----------------------------|-------------------------------|-----------------------------|------------------------------|--------------------------------------|------------------------------------|------------------------------------|
| Greenland     | 7.48<br>(6.70 – 8.41)          | 3.37<br>(2.97 – 3.86)       | 4.11<br>(3.69 – 4.64)       | 4.90<br>(3.68 – 6.12)         | 2.11<br>(1.15 – 2.83)       | 2.80<br>(2.20 – 3.54)        | 160.97<br>(124.87 – 195.15)          | 69.56<br>(41.47 – 92.20)           | 91.42<br>(74.44 – 115.18)          |
| Grenada       | 11.42<br>(10.19 – 12.96)       | 4.85<br>(4.22 – 5.63)       | 6.57<br>(5.80 – 7.52)       | 5.28<br>(4.59 – 5.97)         | 2.41<br>(2.03 – 2.76)       | 2.86<br>(2.49 – 3.26)        | 171.70<br>(147.35 – 194.93)          | 81.05<br>(68.51 – 92.55)           | 90.65<br>(78.56 – 104.19)          |
| Guam          | 18.54<br>(16.49 – 20.73)       | 8.63<br>(7.65 – 9.75)       | 9.91<br>(8.82 – 11.15)      | 5.80<br>(4.82 – 6.87)         | 2.81<br>(2.18 – 3.66)       | 2.99<br>(2.31 – 3.73)        | 250.82<br>(215.72 – 292.88)          | 133.79<br>(109.39 – 166.33)        | 117.03<br>(97.03 – 139.84)         |
| Guatemala     | 1198.23<br>(1065.64 – 1345.01) | 519.84<br>(459.76 – 587.43) | 678.39<br>(596.66 – 770.22) | 300.86<br>(256.65 – 347.89)   | 141.80<br>(117.06 – 165.84) | 159.06<br>(133.59 – 184.89)  | 12,478.24<br>(10,724.55 – 14,233.55) | 5929.18<br>(5018.87 – 6851.13)     | 6549.05<br>(5608.67 – 7536.45)     |
| Guinea        | 554.97<br>(479.73 – 633.15)    | 316.83<br>(272.95 – 366.37) | 238.14<br>(203.14 – 275.13) | 202.33<br>(91.65 – 440.90)    | 109.97<br>(33.73 – 338.40)  | 92.36<br>(54.18 – 209.21)    | 9022.69<br>(4897.76 – 17,588.95)     | 5087.26<br>(2148.55 – 13,208.57)   | 3935.43<br>(2561.80 – 7567.36)     |
| Guinea-Bissau | 76.46<br>(64.55 – 88.27)       | 41.65<br>(35.08 – 48.36)    | 34.8<br>(29.54 – 40.26)     | 40.79<br>(17.07 – 89.93)      | 22.48<br>(5.99 – 71.23)     | 18.3<br>(10.04 – 39.00)      | 1822.08<br>(849.90 – 3821.58)        | 1047.38<br>(349.79 – 2986.93)      | 774.70<br>(453.99 – 1553.56)       |
| Guyana        | 80.84<br>(72.78 – 90.40)       | 35.54<br>(31.87 – 39.70)    | 45.31<br>(40.47 – 51.75)    | 37.48<br>(28.77 – 47.93)      | 19.52<br>(14.71 – 25.05)    | 17.95<br>(13.56 – 23.00)     | 1402.46<br>(1080.68 – 1786.78)       | 743.14<br>(569.50 – 947.90)        | 659.32<br>(499.95 – 847.09)        |
| Haiti         | 1464.4<br>(1290.88 – 1659.95)  | 606.96<br>(528.34 – 693.83) | 857.44<br>(747.80 – 971.51) | 1077.60<br>(568.22 – 1681.55) | 421.31<br>(186.90 – 795.37) | 656.29<br>(222.42 – 1068.50) | 45,553.99<br>(24,479.19 – 66,863.52) | 17,300.25<br>(8880.76 – 28,796.04) | 28,253.74<br>(9637.76 – 43,560.81) |

|                            |                                        |                                      |                                      |                                      |                                      |                                      |                                               |                                           |                                         |
|----------------------------|----------------------------------------|--------------------------------------|--------------------------------------|--------------------------------------|--------------------------------------|--------------------------------------|-----------------------------------------------|-------------------------------------------|-----------------------------------------|
| Honduras                   | 920.07<br>(819.19 – 1035.64)           | 375.62<br>(331.27 – 421.14)          | 544.45<br>(478.93 – 617.50)          | 774.85<br>(542.42 – 1012.95)         | 277.43<br>(172.40 – 406.17)          | 497.42<br>(325.35 – 687.57)          | 25,507.01<br>(17,323.85 – 34,149.77)          | 9349.25<br>(5765.56 – 13,956.93)          | 16,157.76<br>(10,297.74 – 22,413.86)    |
| Hungary                    | 848.18<br>(766.51 – 942.09)            | 348.67<br>(310.53 – 389.31)          | 499.51<br>(452.58 – 559.87)          | 381.26<br>(324.13 – 437.16)          | 156.40<br>(134.32 – 180.06)          | 224.87<br>(190.50 – 259.44)          | 11,389.01<br>(9775.44 – 13,016.55)            | 4,924.69<br>(4269.08 – 5613.96)           | 6464.33<br>(5497.68 – 7438.95)          |
| Iceland                    | 34.39<br>(30.37 – 39.56)               | 16.46<br>(14.30 – 19.22)             | 17.92<br>(15.62 – 20.73)             | 12.29<br>(10.40 – 13.74)             | 5.00<br>(4.33 – 5.64)                | 7.29<br>(5.98 – 8.27)                | 316.20<br>(284.32 – 350.03)                   | 143.08<br>(127.47 – 158.86)               | 173.12<br>(153.08 – 193.96)             |
| India                      | 101,503.37<br>(86,895.35 – 118,265.62) | 53,959.99<br>(45,889.42 – 63,232.67) | 47,543.38<br>(40,775.29 – 55,450.18) | 48,284.62<br>(33,671.85 – 66,531.02) | 26,849.20<br>(13,299.45 – 43,696.33) | 21,435.43<br>(15,961.55 – 29,437.49) | 1,657,353.60<br>(1,212,105.37 – 2,198,269.51) | 931,950.01<br>(521,672.35 – 1,439,379.61) | 725,403.59<br>(558,930.04 – 970,274.14) |
| Indonesia                  | 29,374.98<br>(25,055.82 – 34,149.62)   | 14,009.73<br>(11,854.27 – 16,422.74) | 15,365.25<br>(13,129.84 – 17,924.10) | 14,949.13<br>(10,996.66 – 22,995.92) | 6564.25<br>(3798.69 – 11,412.74)     | 8384.87<br>(5234.01 – 13,349.73)     | 542,472.01<br>(421,992.91 – 753,770.57)       | 254,540.77<br>(164,454.57 – 418,494.09)   | 287,931.24<br>(194,850.02 – 419,814.98) |
| Iran (Islamic Republic of) | 3971.54<br>(3395.11 – 4544.82)         | 1890.21<br>(1612.05 – 2165.37)       | 2081.33<br>(1762.61 – 2406.35)       | 1005.82<br>(786.71 – 1212.57)        | 485.50<br>(339.03 – 646.35)          | 520.32<br>(399.25 – 634.58)          | 33,898.63<br>(28,616.20 – 40,648.70)          | 16,532.87<br>(12,610.84 – 21,517.99)      | 17,365.75<br>(14,300.88 – 21,461.09)    |
| Iraq                       | 1676.02<br>(1428.11 – 1905.89)         | 798.31<br>(674.88 – 915.16)          | 877.70<br>(746.02 – 1008.34)         | 581.50<br>(417.59 – 786.57)          | 291.61<br>(197.45 – 409.51)          | 289.89<br>(199.44 – 404.10)          | 23,351.88<br>(17,842.97 – 30,730.60)          | 11,636.24<br>(8387.46 – 15,552.30)        | 11,715.64<br>(8657.67 – 15,652.41)      |
| Ireland                    | 499.88<br>(442.87 – 575.51)            | 203.86<br>(178.11 – 234.00)          | 296.02<br>(260.27 – 343.55)          | 213.20<br>(185.30 – 234.49)          | 91.61<br>(81.98 – 101.91)            | 121.59<br>(100.45 – 137.19)          | 5338.20<br>(4881.03 – 5806.33)                | 2401.15<br>(2196.14 – 2638.16)            | 2937.05<br>(2590.24 – 3242.95)          |

|            |                                      |                                      |                                      |                                      |                                |                                  |                                        |                                         |                                         |
|------------|--------------------------------------|--------------------------------------|--------------------------------------|--------------------------------------|--------------------------------|----------------------------------|----------------------------------------|-----------------------------------------|-----------------------------------------|
| Israel     | 605.78<br>(522.51 – 697.88)          | 281.19<br>(240.36 – 325.29)          | 324.58<br>(277.32 – 378.54)          | 168.17<br>(148.22 – 184.94)          | 96.00<br>(86.21 – 106.15)      | 72.17<br>(61.03 – 80.81)         | 4646.90<br>(4226.13 – 5067.46)         | 2547.40<br>(2314.46 – 2783.00)          | 2099.50<br>(1863.34 – 2340.86)          |
| Italy      | 5151.36<br>(4585.79 – 5770.49)       | 2159.24<br>(1904.62 – 2436.40)       | 2992.13<br>(2670.02 – 3367.88)       | 2964.51<br>(2531.17 – 3219.10)       | 1248.90<br>(1130.76 – 1324.13) | 1715.61<br>(1394.57 – 1904.91)   | 61,278.41<br>(55,770.61 – 66,042.38)   | 27,102.85<br>(25,354.46 – 28,881.16)    | 34,175.55<br>(30,242.41 – 37,297.47)    |
| Jamaica    | 351.00<br>(314.58 – 394.28)          | 140.64<br>(124.21 – 160.80)          | 210.36<br>(186.13 – 239.69)          | 148.86<br>(115.90 – 189.64)          | 62.01<br>(46.38 – 80.97)       | 86.85<br>(67.68 – 110.18)        | 4600.41<br>(3582.35 – 5838.54)         | 1879.89<br>(1440.10 – 2471.13)          | 2720.52<br>(2104.19 – 3440.84)          |
| Japan      | 37,011.29<br>(32,479.52 – 42,503.85) | 13,565.76<br>(11,782.04 – 15,809.76) | 23,445.52<br>(20,386.05 – 27,189.32) | 14,559.96<br>(12,000.36 – 16,026.64) | 5490.75<br>(5140.62 – 5729.09) | 9069.21<br>(6869.84 – 10,354.10) | 388,913.3<br>(344,185.46 – 426,023.17) | 169,485.66<br>(157,138.01 – 182,011.17) | 219,427.64<br>(187,697.19 – 244,982.01) |
| Jordan     | 490.88<br>(407.61 – 574.76)          | 264.36<br>(222.43 – 307.63)          | 226.51<br>(184.48 – 268.46)          | 38.12<br>(27.66 – 49.08)             | 19.93<br>(12.29 – 28.29)       | 18.19<br>(12.45 – 24.94)         | 2460.34<br>(1963.10 – 2999.05)         | 1300.16<br>(960.92 – 1682.93)           | 1160.18<br>(914.98 – 1476.87)           |
| Kazakhstan | 1852.81<br>(1645.98 – 2077.09)       | 978.39<br>(856.22 – 1123.83)         | 874.42<br>(777.12 – 980.84)          | 1057.07<br>(909.20 – 1217.86)        | 507.74<br>(425.19 – 599.75)    | 549.34<br>(466.72 – 639.69)      | 31,554.73<br>(26,965.96 – 36,229.48)   | 16,789.09<br>(14,071.40 – 19,714.56)    | 14,765.64<br>(12,627.65 – 17,158.74)    |
| Kenya      | 2161.52<br>(1843.53 – 2498.53)       | 1252.51<br>(1064.79 – 1447.02)       | 909.01<br>(770.38 – 1062.26)         | 502.16<br>(223.46 – 1215.21)         | 300.35<br>(98.58 – 948.80)     | 201.80<br>(104.04 – 571.88)      | 20,912.59<br>(10,865.31 – 44,370.20)   | 12,653.06<br>(5148.50 – 34,733.40)      | 8259.53<br>(5043.20 – 20,456.05)        |
| Kiribati   | 21.31<br>(18.68 – 24.12)             | 11.04<br>(9.16 – 12.89)              | 10.27<br>(9.05 – 11.65)              | 7.35<br>(5.24 – 10.68)               | 4.86<br>(3.07 – 8.17)          | 2.49<br>(1.75 – 3.41)            | 354.62<br>(256.81 – 491.14)            | 243.90<br>(164.72 – 378.04)             | 110.72<br>(81.89 – 144.73)              |



|                                        |                             |                             |                             |                             |                             |                             |                                    |                                |                                |
|----------------------------------------|-----------------------------|-----------------------------|-----------------------------|-----------------------------|-----------------------------|-----------------------------|------------------------------------|--------------------------------|--------------------------------|
| Kuwait                                 | 250.15<br>(200.09 – 302.14) | 123.72<br>(100.60 – 148.14) | 126.43<br>(98.77 – 155.27)  | 15.98<br>(13.22 – 19.34)    | 11.22<br>(9.04 – 14.02)     | 4.77<br>(4.03 – 5.57)       | 1126.21<br>(936.42 – 1330.90)      | 643.96<br>(530.30 – 767.65)    | 482.24<br>(389.59 – 595.75)    |
| Kyrgyzstan                             | 564.29<br>(502.58 – 629.38) | 304.26<br>(269.23 – 343.90) | 260.03<br>(231.15 – 292.06) | 301.38<br>(251.17 – 358.07) | 174.87<br>(141.98 – 210.04) | 126.51<br>(105.59 – 152.73) | 10,558.35<br>(8725.60 – 12,536.73) | 6343.40<br>(5167.97 – 7602.76) | 4214.95<br>(3497.51 – 5089.89) |
| Lao People's<br>Democratic<br>Republic | 571.33<br>(498.31 – 650.21) | 281.71<br>(244.58 – 324.19) | 289.62<br>(251.96 – 331.04) | 275.17<br>(194.80 – 404.90) | 131.54<br>(73.70 – 228.15)  | 143.64<br>(86.45 – 226.69)  | 10,871.26<br>(8037.53 – 15,242.21) | 5483.49<br>(3410.61 – 8952.14) | 5387.77<br>(3506.13 – 7809.14) |
| Latvia                                 | 198.15<br>(176.41 – 222.37) | 90.20<br>(79.68 – 101.35)   | 107.95<br>(94.78 – 124.00)  | 122.44<br>(107.70 – 137.72) | 53.67<br>(45.96 – 62.07)    | 68.77<br>(60.24 – 77.88)    | 2961.82<br>(2614.68 – 3352.06)     | 1487.76<br>(1270.67 – 1735.41) | 1474.06<br>(1296.35 – 1677.90) |
| Lebanon                                | 326.77<br>(279.93 – 369.03) | 143.82<br>(123.27 – 162.99) | 182.95<br>(157.38 – 208.64) | 130.53<br>(103.19 – 164.02) | 69.38<br>(49.73 – 92.93)    | 61.15<br>(44.94 – 79.97)    | 3676.20<br>(3055.91 – 4408.26)     | 1895.23<br>(1426.25 – 2435.91) | 1780.97<br>(1445.41 – 2222.84) |
| Lesotho                                | 82.35<br>(71.38 – 93.56)    | 37.10<br>(31.59 – 42.54)    | 45.24<br>(38.80 – 52.29)    | 38.09<br>(22.20 – 64.35)    | 19.80<br>(10.03 – 36.72)    | 18.29<br>(9.99 – 32.16)     | 1365.16<br>(827.30 – 2258.12)      | 754.50<br>(397.45 – 1372.25)   | 610.66<br>(357.85 – 1012.46)   |
| Liberia                                | 207.21<br>(174.91 – 243.38) | 120.64<br>(101.41 – 143.34) | 86.57<br>(72.95 – 101.83)   | 77.89<br>(26.26 – 235.91)   | 43.61<br>(7.58 – 198.62)    | 34.28<br>(16.60 – 93.40)    | 3515.31<br>(1452.24 – 9517.07)     | 2029.56<br>(548.08 – 7866.03)  | 1485.75<br>(834.29 – 3566.29)  |
| Libya                                  | 332.89<br>(281.20 – 386.40) | 153.03<br>(128.03 – 179.39) | 179.87<br>(152.46 – 210.62) | 114.23<br>(65.96 – 177.86)  | 44.16<br>(24.02 – 83.48)    | 70.07<br>(33.86 – 111.84)   | 4863.90<br>(2938.65 – 7359.76)     | 1958.08<br>(1208.13 – 3321.29) | 2905.83<br>(1543.79 – 4478.64) |

|            |                                |                                |                                |                              |                              |                             |                                      |                                      |                                    |
|------------|--------------------------------|--------------------------------|--------------------------------|------------------------------|------------------------------|-----------------------------|--------------------------------------|--------------------------------------|------------------------------------|
| Lithuania  | 267.97<br>(238.69 – 303.07)    | 116.58<br>(103.30 – 132.90)    | 151.39<br>(133.88 – 174.90)    | 169.92<br>(147.66 – 190.40)  | 74.57<br>(63.70 – 85.72)     | 95.35<br>(82.32 – 107.02)   | 4201.30<br>(3689.91 – 4696.50)       | 2087.12<br>(1790.77 – 2388.48)       | 2114.18<br>(1831.33 – 2385.72)     |
| Luxembourg | 47.14<br>(40.99 – 54.59)       | 21.87<br>(18.76 – 25.42)       | 25.27<br>(21.94 – 29.92)       | 17.54<br>(15.52 – 19.47)     | 7.91<br>(6.98 – 8.96)        | 9.64<br>(8.31 – 10.85)      | 443.27<br>(402.70 – 491.55)          | 208.32<br>(187.00 – 232.52)          | 234.95<br>(210.49 – 261.23)        |
| Madagascar | 1770.30<br>(1503.54 – 2078.11) | 1050.35<br>(897.45 – 1242.21)  | 719.95<br>(600.16 – 845.96)    | 736.12<br>(252.70 – 2030.67) | 460.42<br>(107.09 – 1713.50) | 275.69<br>(135.96 – 670.67) | 32,456.78<br>(13,116.97 – 81,902.68) | 20,665.65<br>(6088.50 – 69,796.34)   | 11,791.13<br>(6653.10 – 27,023.09) |
| Malawi     | 783.74<br>(667.19 – 912.03)    | 460.00<br>(390.70 – 541.78)    | 323.74<br>(272.61 – 378.63)    | 297.67<br>(99.54 – 853.78)   | 183.01<br>(39.47 – 747.22)   | 114.66<br>(50.18 – 327.41)  | 12,328.54<br>(4,838.82 – 32,934.30)  | 7812.61<br>(2204.56 – 28,636.82)     | 4515.93<br>(2335.66 – 11,364.58)   |
| Malaysia   | 2751.37<br>(2408.23 – 3100.60) | 1282.72<br>(1119.56 – 1459.34) | 1468.65<br>(1274.78 – 1674.70) | 932.45<br>(717.27 – 1140.61) | 382.03<br>(235.88 – 527.43)  | 550.42<br>(402.00 – 725.20) | 32,528.88<br>(25,809.99 – 38,492.27) | 14,641.60<br>(10,384.82 – 19,041.41) | 17,887.28<br>(13,924. – 22,024.35) |
| Maldives   | 39.57<br>(33.31 – 46.27)       | 24.29<br>(20.27 – 29.05)       | 15.27<br>(12.96 – 17.59)       | 8.89<br>(6.83 – 11.31)       | 4.93<br>(3.47 – 7.10)        | 3.97<br>(3.02 – 5.17)       | 354.15<br>(279.54 – 455.92)          | 218.61<br>(165.59 – 311.84)          | 135.54<br>(107.83 – 171.83)        |
| Mali       | 826.47<br>(707.59 – 943.21)    | 489.95<br>(415.74 – 561.99)    | 336.51<br>(282.31 – 389.47)    | 266.06<br>(126.08 – 573.70)  | 128.43<br>(41.11 – 415.76)   | 137.63<br>(78.34 – 273.52)  | 12,358.67<br>(7098.42 – 23,855.83)   | 6273.06<br>(2871.03 – 17,161.97)     | 6085.61<br>(3768.13 – 11,547.35)   |
| Malta      | 40.43<br>(34.94 – 46.50)       | 18.03<br>(15.46 – 20.91)       | 22.41<br>(19.02 – 26.11)       | 10.46<br>(9.21 – 11.75)      | 4.55<br>(4.04 – 5.14)        | 5.92<br>(5.09 – 6.75)       | 320.79<br>(285.49 – 361.84)          | 141.81<br>(125.69 – 161.04)          | 178.97<br>(157.15 – 201.81)        |

|                                             |                                      |                                |                                |                                |                                |                                |                                         |                                      |                                       |
|---------------------------------------------|--------------------------------------|--------------------------------|--------------------------------|--------------------------------|--------------------------------|--------------------------------|-----------------------------------------|--------------------------------------|---------------------------------------|
| Marshall Islands                            | 9.04<br>(7.90 – 10.25)               | 4.53<br>(3.93 – 5.20)          | 4.52<br>(3.94 – 5.10)          | 4.68<br>(2.99 – 6.96)          | 2.63<br>(1.35 – 4.34)          | 2.06<br>(1.07 – 3.18)          | 208.39<br>(138.78 – 300.94)             | 121.93<br>(68.04 – 190.75)           | 86.46<br>(49.21 – 128.95)             |
| Mauritania                                  | 164.94<br>(140.09 – 192.74)          | 89.68<br>(76.01 – 105.32)      | 75.26<br>(63.18 – 87.68)       | 52.79<br>(23.24 – 121.62)      | 25.47<br>(7.28 – 94.54)        | 27.32<br>(14.86 – 60.97)       | 2171.38<br>(1138.84 – 4635.35)          | 1112.57<br>(447.70 – 3544.95)        | 1058.81<br>(648.31 – 2122.60)         |
| Mauritius                                   | 171.61<br>(151.72 – 195.38)          | 78.83<br>(69.52 – 90.23)       | 92.78<br>(81.50 – 107.16)      | 97.47<br>(89.77 – 103.96)      | 47.94<br>(43.98 – 51.57)       | 49.53<br>(44.71 – 53.51)       | 3138.94<br>(2870.25 – 3347.17)          | 1640.35<br>(1489.47 – 1774.47)       | 1498.59<br>(1361.01 – 1624.87)        |
| Mexico                                      | 12,882.66<br>(11,193.66 – 14,846.74) | 5411.15<br>(4705.19 – 6223.49) | 7471.51<br>(6462.49 – 8680.30) | 5113.92<br>(4541.28 – 5694.27) | 2367.70<br>(1994.46 – 2781.54) | 2746.22<br>(2328.33 – 3151.19) | 172,718.14<br>(154,806.56 – 192,396.29) | 84,028.15<br>(71,521.48 – 97,365.69) | 88,689.99<br>(76,596.13 – 101,848.64) |
| Micronesia (Federated States of Micronesia) | 16.62<br>(14.63 – 18.70)             | 8.05<br>(7.01 – 9.17)          | 8.57<br>(7.57 – 9.79)          | 8.84<br>(5.71 – 12.62)         | 4.76<br>(2.73 – 7.76)          | 4.08<br>(2.41 – 6.37)          | 367.48<br>(247.67 – 505.07)             | 215.71<br>(134.82 – 331.41)          | 151.77<br>(94.35 – 226.14)            |
| Monaco                                      | 3.60<br>(3.13 – 4.20)                | 1.49<br>(1.27 – 1.78)          | 2.11<br>(1.82 – 2.46)          | 1.62<br>(1.17 – 2.18)          | 0.51<br>(0.32 – 0.71)          | 1.11<br>(0.74 – 1.56)          | 42.65<br>(32.27 – 55.42)                | 15.00<br>(10.51 – 19.76)             | 27.66<br>(19.73 – 37.87)              |
| Mongolia                                    | 329.70<br>(289.50 – 373.98)          | 173.59<br>(149.02 – 201.99)    | 156.10<br>(136.91 – 176.75)    | 263.24<br>(192.17 – 341.42)    | 138.08<br>(87.09 – 203.)       | 125.16<br>(92.00 – 167.17)     | 8234.61<br>(6170.67 – 10,980.21)        | 4595.66<br>(2894.05 – 6740.20)       | 3638.95<br>(2736.06 – 4790.46)        |
| Montenegro                                  | 39.85<br>(34.88 – 45.07)             | 18.32<br>(15.84 – 20.97)       | 21.53<br>(18.90 – 24.33)       | 19.10<br>(13.62 – 25.70)       | 6.69<br>(4.08 – 10.33)         | 12.41<br>(8.01 – 17.75)        | 530.98<br>(407.03 – 683.52)             | 203.55<br>(141.46 – 291.10)          | 327.43<br>(233.76 – 445.86)           |

|             |                                |                                |                                |                                |                               |                               |                                        |                                    |                                      |
|-------------|--------------------------------|--------------------------------|--------------------------------|--------------------------------|-------------------------------|-------------------------------|----------------------------------------|------------------------------------|--------------------------------------|
| Morocco     | 2445.18<br>(2129.40 – 2778.28) | 1156.05<br>(1009.13 – 1308.95) | 1289.13<br>(1114.17 – 1470.76) | 1111.11<br>(651.02 – 1761.57)  | 455.58<br>(221.94 – 905.80)   | 655.53<br>(286.04 – 1056.42)  | 35,213.52<br>(21,441.38 – 53,544.01)   | 13,840.03<br>(7468.13 – 25,791.33) | 21,373.49<br>(10,262.43 – 33,851.62) |
| Mozambique  | 1445.65<br>(1242.59 – 1674.33) | 857.42<br>(730.24 – 994.14)    | 588.23<br>(500.39 – 693.08)    | 694.00<br>(222.66 – 1992.21)   | 491.39<br>(121.50 – 1781.65)  | 202.61<br>(89.30 – 547.92)    | 27,379.83<br>(10,081.10 – 74,493.15)   | 19,822.65<br>(5813.91 – 67,281.51) | 7557.18<br>(3823.91 – 18,009.91)     |
| Myanmar     | 4975.62<br>(4419.14 – 5617.97) | 2495.96<br>(2183.02 – 2855.89) | 2479.66<br>(2187.72 – 2831.76) | 2854.08<br>(2017.94 – 4436.34) | 1496.80<br>(959.53 – 2484.40) | 1357.28<br>(940.69 – 2180.22) | 103,279.71<br>(77,326.03 – 142,870.59) | 57,606.64<br>(38,816. – 87,396.20) | 45,673.07<br>(33,576.65 – 64,893.04) |
| Namibia     | 101.37<br>(87.23 – 117.42)     | 50.38<br>(42.98 – 57.72)       | 50.99<br>(43.44 – 59.44)       | 27.05<br>(17.46 – 43.96)       | 14.82<br>(8.89 – 27.52)       | 12.23<br>(7.67 – 22.55)       | 1037.20<br>(708.86 – 1628.37)          | 590.37<br>(363.43 – 1021.63)       | 446.84<br>(304.47 – 776.30)          |
| Nauru       | 1.46<br>(1.29 – 1.62)          | 0.70<br>(0.61 – 0.80)          | 0.76<br>(0.67 – 0.85)          | 0.89<br>(0.63 – 1.21)          | 0.39<br>(0.23 – 0.58)         | 0.50<br>(0.32 – 0.70)         | 42.04<br>(30.98 – 55.77)               | 20.09<br>(12.67 – 28.64)           | 21.95<br>(15.26 – 30.11)             |
| Nepal       | 2283.78<br>(1968.77 – 2635.52) | 1077.61<br>(923.10 – 1252.45)  | 1206.17<br>(1024.47 – 1410.46) | 1068.19<br>(630.31 – 1674.85)  | 567.53<br>(247.50 – 1153.04)  | 500.66<br>(304.78 – 904.24)   | 36,133.93<br>(22,914.28 – 54,335.61)   | 19,198.76<br>(9628.18 – 37,069.74) | 16,935.17<br>(11,192.16 – 27,130.54) |
| Netherlands | 1693.99<br>(1495.57 – 1948.73) | 686.48<br>(596.92 – 793.87)    | 1007.51<br>(880.72 – 1174.56)  | 792.40<br>(697.82 – 860.64)    | 328.22<br>(296.35 – 360.78)   | 464.18<br>(398.21 – 514.37)   | 19,116.60<br>(17,523.75 – 20,504.29)   | 8133.43<br>(7448.74 – 8846.33)     | 10,983.17<br>(9938.32 – 12,008.67)   |
| New Zealand | 404.06<br>(355.83 – 460.19)    | 160.36<br>(139.26 – 184.34)    | 243.70<br>(215.06 – 276.07)    | 240.43<br>(214.90 – 261.71)    | 97.96<br>(90.19 – 106.07)     | 142.47<br>(123.46 – 157.21)   | 6421.40<br>(5923.81 – 6890.71)         | 2731.84<br>(2537.35 – 2927.76)     | 3689.56<br>(3337.63 – 4016.11)       |

|                          |                                |                                |                                |                               |                              |                              |                                       |                                       |                                      |
|--------------------------|--------------------------------|--------------------------------|--------------------------------|-------------------------------|------------------------------|------------------------------|---------------------------------------|---------------------------------------|--------------------------------------|
| Nicaragua                | 573.03<br>(498.02 – 651.34)    | 226.25<br>(195.32 – 259.16)    | 346.78<br>(299.74 – 396.46)    | 142.75<br>(111.83 – 174.44)   | 55.74<br>(38.48 – 72.99)     | 87.01<br>(64.35 – 111.29)    | 5484.41<br>(4476.19 – 6642.19)        | 2233.02<br>(1667.26 – 2864.32)        | 3251.38<br>(2541.45 – 4051.41)       |
| Niger                    | 916.56<br>(786.20 – 1048.63)   | 509.46<br>(431.42 – 587.58)    | 407.10<br>(347.61 – 470.10)    | 272.18<br>(106.09 – 665.75)   | 154.48<br>(33.22 – 510.29)   | 117.70<br>(63.30 – 297.43)   | 11,983.47<br>(6065.72 – 25,235.97)    | 6886.83<br>(2387.41 – 19,330.77)      | 5096.64<br>(3125.07 – 10,703.81)     |
| Nigeria                  | 7451.63<br>(6273.52 – 8603.02) | 3852.81<br>(3256.98 – 4452.12) | 3598.82<br>(3017.29 – 4164.76) | 1651.78<br>(810.75 – 3669.01) | 959.88<br>(327.57 – 3043.67) | 691.91<br>(403.54 – 1433.00) | 77,265.21<br>(47,024.06 – 148,445.10) | 46,001.92<br>(22,439.88 – 120,010.29) | 31,263.29<br>(21,553.93 – 53,948.42) |
| Niue                     | 0.25<br>(0.22 – 0.28)          | 0.10<br>(0.09 – 0.12)          | 0.14<br>(0.13 – 0.16)          | 0.14<br>(0.11 – 0.18)         | 0.06<br>(0.04 – 0.08)        | 0.08<br>(0.06 – 0.11)        | 5.29<br>(4.33 – 6.62)                 | 2.50<br>(1.90 – 3.38)                 | 2.79<br>(2.17 – 3.51)                |
| North Macedonia          | 344.85<br>(312.59 – 379.36)    | 147.29<br>(132.77 – 164.12)    | 197.56<br>(178.83 – 220.55)    | 225.00<br>(170.92 – 285.92)   | 80.55<br>(56.29 – 110.45)    | 144.44<br>(102.72 – 191.41)  | 6415.29<br>(5011.07 – 8044.85)        | 2437.59<br>(1749.06 – 3235.09)        | 3977.7<br>(2897.49 – 5132.06)        |
| Northern Mariana Islands | 6.57<br>(5.80 – 7.46)          | 3.65<br>(3.16 – 4.24)          | 2.92<br>(2.58 – 3.32)          | 3.15<br>(2.49 – 4.02)         | 1.51<br>(1.11 – 2.09)        | 1.64<br>(1.28 – 2.14)        | 115.85<br>(92.74 – 144.80)            | 62.97<br>(48.16 – 84.60)              | 52.89<br>(41.84 – 65.69)             |
| Norway                   | 547.74<br>(477.16 – 629.35)    | 241.57<br>(209.96 – 279.52)    | 306.17<br>(267.43 – 352.01)    | 229.64<br>(201.32 – 247.79)   | 99.77<br>(91.02 – 106.31)    | 129.87<br>(110.89 – 142.62)  | 5553.51<br>(5076.10 – 6019.25)        | 2624.70<br>(2421.31 – 2826.88)        | 2928.82<br>(2633.33 – 3203.34)       |
| Oman                     | 322.15<br>(277.46 – 363.75)    | 173.87<br>(148.18 – 197.16)    | 148.28<br>(129.75 – 168.79)    | 31.15<br>(20.85 – 42.06)      | 18.02<br>(11.35 – 28.21)     | 13.13<br>(8.30 – 18.38)      | 1662.46<br>(1306.76 – 2106.09)        | 967.86<br>(715.12 – 1374.94)          | 694.61<br>(537.09 – 886.13)          |

|                     |                                         |                                     |                                   |                                     |                                |                                   |                                            |                                           |                                           |
|---------------------|-----------------------------------------|-------------------------------------|-----------------------------------|-------------------------------------|--------------------------------|-----------------------------------|--------------------------------------------|-------------------------------------------|-------------------------------------------|
| Pakistan            | 17,598.22<br>(15,071.32 –<br>20,382.69) | 9001.18<br>(7665.90 –<br>10,392.15) | 8597.04<br>(7313.98 –<br>9992.53) | 7368.31<br>(4886.94 –<br>11,101.50) | 3766.67<br>(1953.94 – 7013.72) | 3601.64<br>(2119.33 –<br>5648.52) | 300,149.86<br>(213,300.67 –<br>421,458.55) | 154,761.87<br>(92,755.66 –<br>268,978.81) | 145,387.99<br>(92,024.37 –<br>213,639.49) |
| Palau               | 3.08<br>(2.71 – 3.55)                   | 1.57<br>(1.36 – 1.81)               | 1.51<br>(1.33 – 1.74)             | 1.28<br>(0.96 – 1.64)               | 0.72<br>(0.48 – 1.00)          | 0.56<br>(0.42 – 0.74)             | 52.71<br>(40.61 – 65.42)                   | 32.85<br>(23.37 – 43.08)                  | 19.86<br>(15.49 – 24.89)                  |
| Palestine           | 207.70<br>(174.47 – 238.66)             | 98.23<br>(81.94 – 113.36)           | 109.47<br>(91.63 – 126.55)        | 23.57<br>(18.25 – 28.70)            | 11.46<br>(7.81 – 15.24)        | 12.10<br>(9.22 – 15.40)           | 1210.67<br>(1015.31 – 1438.06)             | 588.46<br>(458.23 – 746.84)               | 622.21<br>(511.88 –<br>763.45)            |
| Panama              | 521.86<br>(462.04 – 588.07)             | 223.98<br>(196.17 – 255.54)         | 297.89<br>(259.56 – 338.14)       | 221.44<br>(173.53 – 265.51)         | 106.68<br>(81.69 – 130.65)     | 114.76<br>(92.07 – 136.83)        | 6784.43<br>(5454.03 – 8048.62)             | 3244.60<br>(2526.02 – 3922.13)            | 3539.83<br>(2923.28 –<br>4175.78)         |
| Papua New<br>Guinea | 805.64<br>(705.51 – 903.20)             | 443.26<br>(386.17 – 505.75)         | 362.39<br>(314.09 – 407.29)       | 504.94<br>(340.43 – 731.71)         | 245.37<br>(134.47 – 441.36)    | 259.57<br>(161.63 – 377.57)       | 22,851.5<br>(16,572.05 –<br>30,613.99)     | 11,541.92<br>(7017.34 – 18,635.19)        | 11,309.58<br>(7581.23 –<br>15,717.86)     |
| Paraguay            | 711.66<br>(632.87 – 793.84)             | 306.28<br>(269.62 – 348.31)         | 405.38<br>(359.63 – 460.37)       | 333.54<br>(249.61 – 435.58)         | 128.71<br>(87.07 – 183.34)     | 204.83<br>(145.17 – 274.67)       | 11,462.69<br>(8839.32 – 14,748.88)         | 4602.15<br>(3202.31 – 6384.99)            | 6860.55<br>(5093.49 –<br>9124.79)         |
| Peru                | 3772.06<br>(3341.19 –<br>4235.87)       | 1719.17<br>(1517.17 – 1931.93)      | 2052.89<br>(1801.89 –<br>2346.99) | 1476.93<br>(1061.29 –<br>1977.84)   | 631.66<br>(411.98 – 870.50)    | 845.27<br>(576.56 –<br>1151.15)   | 55,188.15<br>(40,896.99 –<br>70,949.88)    | 25,387.33<br>(17,470.04 –<br>33,956.76)   | 29,800.82<br>(21,522.72 –<br>39,382.91)   |
| Philippines         | 9471.19<br>(8154.81 –<br>10,901.26)     | 4542.52<br>(3869.07 – 5256.30)      | 4928.66<br>(4244.72 –<br>5691.49) | 3720.96<br>(3035.96 –<br>4446.95)   | 1768.90<br>(1240.10 – 2345.75) | 1952.06<br>(1498.73 –<br>2439.43) | 150,709.5<br>(120,818.33 –<br>177,279.40)  | 76,018.32<br>(53,462.09 –<br>96,147.03)   | 74,691.18<br>(59,008.75 –<br>91,727.42)   |

|                     |                                      |                                  |                                     |                                      |                                |                                |                                         |                                         |                                         |
|---------------------|--------------------------------------|----------------------------------|-------------------------------------|--------------------------------------|--------------------------------|--------------------------------|-----------------------------------------|-----------------------------------------|-----------------------------------------|
| Poland              | 3318.46<br>(2910.54 – 3855.53)       | 1594.78<br>(1387.98 – 1845.70)   | 1723.68<br>(1509.01 – 1995.52)      | 1678.47<br>(1525.17 – 1830.65)       | 796.07<br>(707.78 – 880.91)    | 882.40<br>(769.66 – 980.63)    | 51,621.50<br>(47,153.90 – 56,396.05)    | 26,659.8<br>(23,825.74 – 29,431.65)     | 24,961.69<br>(22,249.87 – 27,769.39)    |
| Portugal            | 1092.22<br>(944.36 – 1235.12)        | 480.14<br>(417.88 – 548.56)      | 612.08<br>(509.67 – 697.21)         | 782.12<br>(681.47 – 852.09)          | 328.85<br>(298.02 – 357.27)    | 453.28<br>(376.05 – 504.75)    | 16,751.03<br>(15,399.43 – 18,034.68)    | 7447.06<br>(6834.82 – 8027.22)          | 9303.98<br>(8311.73 – 10,127.79)        |
| Puerto Rico         | 368.76<br>(321.36 – 421.27)          | 140.66<br>(122.54 – 162.45)      | 228.10<br>(197.11 – 266.12)         | 132.08<br>(109.08 – 153.80)          | 53.87<br>(43.97 – 64.16)       | 78.21<br>(64.13 – 91.50)       | 3580.39<br>(3025.33 – 4154.94)          | 1491.17<br>(1230.16 – 1771.55)          | 2089.22<br>(1778.09 – 2431.81)          |
| Qatar               | 187.75<br>(151.72 – 227.41)          | 120.21<br>(94.48 – 147.01)       | 67.54<br>(55.62 – 80.27)            | 29.36<br>(20.26 – 42.01)             | 23.47<br>(15.45 – 35.29)       | 5.89<br>(4.09 – 7.99)          | 1506.07<br>(1126.67 – 1988.79)          | 1174.45<br>(844.62 – 1641.80)           | 331.62<br>(256.73 – 412.13)             |
| Republic of Korea   | 8825.64<br>(7695.53 – 10,359.89)     | 3374.53<br>(2847.80 – 4023.55)   | 5451.11<br>(4686.08 – 6403.42)      | 3044.19<br>(2481.61 – 3586.88)       | 1146.77<br>(835.48 – 1436.48)  | 1897.43<br>(1454.77 – 2351.03) | 90,558.76<br>(78,706.31 – 104,699.58)   | 39,885.12<br>(31,784.15 – 48,558.87)    | 50,673.64<br>(42,246.13 – 60,083.44)    |
| Republic of Moldova | 272.68<br>(237.22 – 308.68)          | 140.72<br>(122.02 – 161.45)      | 131.97<br>(113.91 – 152.48)         | 120.75<br>(108.64 – 135.55)          | 66.67<br>(57.73 – 77.24)       | 54.08<br>(47.51 – 61.67)       | 3618.55<br>(3235.68 – 4074.43)          | 2091.80<br>(1813.17 – 2397.75)          | 1526.75<br>(1357.87 – 1710.24)          |
| Romania             | 3152.63<br>(2901.62 – 3424.40)       | 1436.84<br>(1296.00 – 1580.76)   | 1715.79<br>(1568.14 – 1884.19)      | 1874.89<br>(1627.43 – 2109.37)       | 851.55<br>(720.91 – 990.78)    | 1023.34<br>(875.91 – 1163.69)  | 45,287.46<br>(38,768.24 – 51,071.02)    | 22,571.05<br>(19,009.20 – 26,219.91)    | 22,716.41<br>(19,747.74 – 25,509.23)    |
| Russian Federation  | 20,253.16<br>(17,894.64 – 23,245.53) | 9720.20<br>(8468.33 – 11,255.42) | 10,532.96<br>(9,271.69 – 12,085.71) | 13,480.56<br>(12,416.88 – 14,527.99) | 5968.02<br>(5336.43 – 6572.80) | 7512.54<br>(6699.71 – 8248.70) | 370,212.45<br>(343,245.15 – 400,092.75) | 189,299.50<br>(169,762.43 – 208,066.50) | 180,912.95<br>(162,531.85 – 199,108.07) |

|                                        |                                |                              |                             |                             |                            |                             |                                      |                                  |                                  |
|----------------------------------------|--------------------------------|------------------------------|-----------------------------|-----------------------------|----------------------------|-----------------------------|--------------------------------------|----------------------------------|----------------------------------|
| Rwanda                                 | 639.91<br>(543.50 – 738.03)    | 348.43<br>(294.66 – 405.00)  | 291.48<br>(247.36 – 337.88) | 184.12<br>(65.72 – 478.93)  | 115.60<br>(28.57 – 393.85) | 68.52<br>(30.36 – 172.32)   | 7397.00<br>(3223.68 – 18,048.47)     | 4642.17<br>(1480.96 – 14,595.15) | 2754.84<br>(1507.35 – 6107.47)   |
| Saint Kitts<br>and Nevis               | 6.86<br>(6.04 – 7.80)          | 3.07<br>(2.68 – 3.51)        | 3.79<br>(3.32 – 4.33)       | 2.90<br>(2.39 – 3.44)       | 1.37<br>(1.13 – 1.63)      | 1.53<br>(1.25 – 1.83)       | 95.42<br>(79.50 – 114.09)            | 47.44<br>(39.42 – 57.17)         | 47.97<br>(39.64 – 57.71)         |
| Saint Lucia                            | 21.00<br>(18.61 – 23.86)       | 8.50<br>(7.43 – 9.87)        | 12.50<br>(10.96 – 14.25)    | 8.66<br>(7.04 – 10.37)      | 3.47<br>(2.77 – 4.18)      | 5.19<br>(4.26 – 6.22)       | 273.48<br>(225.69 – 328.04)          | 113.11<br>(91.80 – 134.55)       | 160.38<br>(133.51 – 191.98)      |
| Saint Vincent<br>and the<br>Grenadines | 10.76<br>(9.60 – 12.17)        | 4.74<br>(4.19 – 5.42)        | 6.02<br>(5.33 – 6.86)       | 4.38<br>(3.83 – 4.97)       | 2.07<br>(1.78 – 2.36)      | 2.31<br>(1.98 – 2.66)       | 147.58<br>(129.32 – 167.83)          | 67.11<br>(58.44 – 76.12)         | 80.47<br>(69.56 – 93.10)         |
| Samoa                                  | 26.20<br>(23.46 – 29.56)       | 11.93<br>(10.48 – 13.55)     | 14.27<br>(12.68 – 16.20)    | 11.70<br>(8.22 – 16.58)     | 5.18<br>(3.07 – 8.77)      | 6.53<br>(4.54 – 9.10)       | 460.49<br>(332.31 – 625.23)          | 233.56<br>(146.26 – 368.68)      | 226.93<br>(164.78 – 306.29)      |
| San Marino                             | 2.87<br>(2.46 – 3.40)          | 1.30<br>(1.11 – 1.52)        | 1.58<br>(1.33 – 1.88)       | 0.52<br>(0.32 – 0.75)       | 0.22<br>(0.12 – 0.34)      | 0.30<br>(0.18 – 0.46)       | 17.05<br>(12.58 – 22.75)             | 7.39<br>(5.30 – 10.30)           | 9.66<br>(7.06 – 13.16)           |
| Sao Tome and<br>Principe               | 10.08<br>(8.57 – 11.82)        | 5.44<br>(4.61 – 6.54)        | 4.63<br>(3.88 – 5.42)       | 3.24<br>(1.37 – 8.15)       | 1.61<br>(0.35 – 6.57)      | 1.62<br>(0.95 – 3.69)       | 142.47<br>(68.18 – 343.78)           | 76.86<br>(23.75 – 278.99)        | 65.61<br>(40.74 – 131.78)        |
| Saudi Arabia                           | 1604.26<br>(1316.61 – 1891.46) | 832.54<br>(664.90 – 1011.11) | 771.72<br>(641.46 – 901.70) | 336.04<br>(214.79 – 465.54) | 165.60<br>(73.61 – 253.54) | 170.44<br>(107.68 – 254.47) | 16,539.95<br>(11,317.84 – 22,019.72) | 8193.95<br>(4264.49 – 11,971.09) | 8346.00<br>(5695.61 – 11,678.85) |



|                 |                                |                             |                             |                             |                             |                             |                                      |                                  |                                   |
|-----------------|--------------------------------|-----------------------------|-----------------------------|-----------------------------|-----------------------------|-----------------------------|--------------------------------------|----------------------------------|-----------------------------------|
| Senegal         | 595.54<br>(506.38 – 691.25)    | 328.51<br>(278.31 – 380.65) | 267.02<br>(223.37 – 312.68) | 237.52<br>(108.55 – 544.97) | 128.53<br>(35.16 – 432.16)  | 108.99<br>(64.03 – 249.26)  | 9847.76<br>(5069.51 – 21,004.63)     | 5584.19<br>(2062.34 – 16,699.14) | 4263.57<br>(2739.08 – 8460.16)    |
| Serbia          | 1373.21<br>(1258.09 – 1495.38) | 543.76<br>(489.93 – 597.45) | 829.45<br>(761.10 – 910.64) | 757.68<br>(600.16 – 953.56) | 275.47<br>(193.43 – 372.65) | 482.22<br>(366.31 – 628.55) | 19,696.47<br>(15,842.08 – 23,923.38) | 7609.17<br>(5660.33 – 9916.25)   | 12,087.3<br>(9574.65 – 15,463.68) |
| Seychelles      | 8.36<br>(7.23 – 9.60)          | 4.11<br>(3.53 – 4.80)       | 4.25<br>(3.67 – 4.96)       | 2.25<br>(1.50 – 3.27)       | 1.04<br>(0.38 – 2.10)       | 1.21<br>(0.67 – 1.89)       | 89.20<br>(66.43 – 116.62)            | 44.81<br>(22.27 – 76.28)         | 44.39<br>(30.34 – 61.81)          |
| Sierra Leone    | 351.57<br>(299.28 – 399.69)    | 197.69<br>(169.88 – 226.91) | 153.87<br>(128.90 – 178.54) | 136.51<br>(58.95 – 360.71)  | 72.35<br>(18.22 – 284.44)   | 64.16<br>(33.60 – 154.49)   | 6315.55<br>(3170.72 – 14,617.01)     | 3475.46<br>(1287.35 – 11,348.81) | 2840.09<br>(1645.41 – 5977.10)    |
| Singapore       | 713.55<br>(597.65 – 859.53)    | 317.44<br>(259.31 – 388.50) | 396.11<br>(329.06 – 483.72) | 111.52<br>(100.10 – 121.40) | 44.35<br>(40.01 – 48.59)    | 67.17<br>(58.43 – 74.44)    | 4757.52<br>(4160.94 – 5325.43)       | 2089.94<br>(1829.91 – 2354.98)   | 2667.58<br>(2314.84 – 3034.42)    |
| Slovakia        | 409.31<br>(361.00 – 459.32)    | 187.51<br>(162.98 – 211.72) | 221.8<br>(195.31 – 251.68)  | 189.52<br>(147.78 – 234.63) | 78.21<br>(55.03 – 101.19)   | 111.31<br>(81.18 – 145.65)  | 5837.04<br>(4790.73 – 7064.08)       | 2589.81<br>(1938.82 – 3294.32)   | 3247.23<br>(2557.23 – 4111.65)    |
| Slovenia        | 162.54<br>(142.95 – 186.10)    | 71.49<br>(61.79 – 81.92)    | 91.05<br>(79.94 – 104.50)   | 63.00<br>(52.89 – 71.93)    | 25.21<br>(21.56 – 29.16)    | 37.79<br>(30.77 – 44.03)    | 1582.88<br>(1353.35 – 1791.26)       | 703.5<br>(593.94 – 805.58)       | 879.38<br>(742.80 – 1010.02)      |
| Solomon Islands | 112.77<br>(99.91 – 127.72)     | 51.51<br>(45.12 – 59.74)    | 61.26<br>(53.91 – 69.09)    | 40.77<br>(25.84 – 59.32)    | 21.58<br>(11.65 – 35.21)    | 19.19<br>(11.67 – 30.20)    | 1647.28<br>(1130.89 – 2290.45)       | 931.13<br>(562.73 – 1409.25)     | 716.15<br>(476.09 – 1026.80)      |

|              |                                |                                |                                |                                |                               |                                |                                      |                                      |                                      |
|--------------|--------------------------------|--------------------------------|--------------------------------|--------------------------------|-------------------------------|--------------------------------|--------------------------------------|--------------------------------------|--------------------------------------|
| Somalia      | 1001.64<br>(849.77 – 1170.70)  | 593.92<br>(498.30 – 695.95)    | 407.71<br>(342.92 – 486.08)    | 330.63<br>(59.38 – 1095.32)    | 222.07<br>(17.23 – 933.67)    | 108.56<br>(30.76 – 470.07)     | 14,347.46<br>(3648.98 – 43,037.79)   | 9787.95<br>(1474.81 – 37,194.85)     | 4559.50<br>(1750.69 – 16,702.65)     |
| South Africa | 2390.06<br>(2039.24 – 2797.73) | 1102.25<br>(938.98 – 1277.95)  | 1287.81<br>(1090.70 – 1528.03) | 677.05<br>(553.16 – 784.29)    | 301.61<br>(198.90 – 392.16)   | 375.44<br>(295.42 – 444.08)    | 25,801.10<br>(21,831.83 – 29,660.51) | 12,139.52<br>(8829.35 – 15,307.73)   | 13,661.58<br>(11,164.11 – 16,088.19) |
| South Sudan  | 399.91<br>(339.72 – 461.15)    | 236.77<br>(202.83 – 272.57)    | 163.14<br>(136.20 – 193.29)    | 137.86<br>(56.11 – 316.88)     | 91.4<br>(26.04 – 264.56)      | 46.46<br>(24.51 – 106.46)      | 5871.41<br>(2869.72 – 12,151.43)     | 3798.14<br>(1432.15 – 9478.12)       | 2073.27<br>(1235.00 – 4176.28)       |
| Spain        | 4623.60<br>(4083.83 – 5223.32) | 1991.00<br>(1741.61 – 2259.31) | 2632.59<br>(2320.48 – 2997.14) | 2474.26<br>(2122.66 – 2720.22) | 1140.3<br>(1025.38 – 1245.45) | 1333.95<br>(1081.96 – 1508.69) | 53,156.45<br>(48,538.07 – 57,519.32) | 24,860.37<br>(22,852.85 – 26,836.15) | 28,296.08<br>(24,941.82 – 31,144.73) |
| Sri Lanka    | 2615.54<br>(2304.16 – 2954.90) | 1179.22<br>(1037.64 – 1337.26) | 1436.32<br>(1253.23 – 1638.97) | 495.72<br>(330.61 – 684.68)    | 229.96<br>(137.35 – 342.11)   | 265.77<br>(171.91 – 389.69)    | 17,825.05<br>(13,270.39 – 22,811.94) | 8464.03<br>(5749.78 – 11,967.60)     | 9361.03<br>(7005.49 – 12,348.52)     |
| Sudan        | 1851.3<br>(1607.52 – 2098.60)  | 938.68<br>(818.83 – 1068.29)   | 912.62<br>(777.22 – 1045.95)   | 771.99<br>(386.66 – 1350.76)   | 371.13<br>(147.51 – 819.32)   | 400.86<br>(154.57 – 728.82)    | 32,378.94<br>(17,157.46 – 53,172.79) | 15,044.62<br>(7145.74 – 29,209.22)   | 17,334.32<br>(7658.97 – 29,892.03)   |
| Suriname     | 64.21<br>(56.99 – 72.81)       | 28.19<br>(24.94 – 31.92)       | 36.02<br>(31.65 – 41.49)       | 28.17<br>(21.08 – 36.66)       | 13.19<br>(9.27 – 18.61)       | 14.98<br>(11.15 – 19.52)       | 992.69<br>(783.20 – 1248.41)         | 467.73<br>(344.87 – 648.16)          | 524.96<br>(408.20 – 658.61)          |
| Sweden       | 1038.10<br>(894.94 – 1202.39)  | 480.49<br>(411.84 – 559.25)    | 557.61<br>(478.59 – 649.23)    | 411.84<br>(352.30 – 466.38)    | 156.43<br>(131.59 – 179.55)   | 255.41<br>(209.72 – 294.47)    | 9604.48<br>(8563.56 – 10,707.74)     | 4026.13<br>(3468.20 – 4608.31)       | 5578.35<br>(4854.45 – 6304.65)       |

|                               |                                      |                                |                                |                                  |                                |                                |                                         |                                         |                                       |
|-------------------------------|--------------------------------------|--------------------------------|--------------------------------|----------------------------------|--------------------------------|--------------------------------|-----------------------------------------|-----------------------------------------|---------------------------------------|
| Switzerland                   | 765.47<br>(666.81 – 891.10)          | 323.96<br>(277.87 – 377.43)    | 441.51<br>(383.37 – 515.11)    | 332.46<br>(279.45 – 370.91)      | 140.1<br>(125.02 – 154.51)     | 192.36<br>(154.83 – 219.42)    | 7361.69<br>(6596.10 – 8087.88)          | 3307.48<br>(3026.20 – 3616.11)          | 4054.21<br>(3534.62 – 4506.76)        |
| Syrian Arab Republic          | 879.73<br>(767.05 – 986.19)          | 446.22<br>(392.99 – 506.01)    | 433.51<br>(373.01 – 493.71)    | 279.22<br>(185.27 – 400.02)      | 147.99<br>(88.77 – 235.90)     | 131.23<br>(85.48 – 190.87)     | 10,445.98<br>(7545.48 – 14,292.22)      | 5314.39<br>(3494.99 – 7925.51)          | 5131.59<br>(3699.41 – 7067.51)        |
| Taiwan<br>(Province of China) | 3028.13<br>(2678.85 – 3453.44)       | 1387.72<br>(1223.11 – 1580.99) | 1640.41<br>(1422. – 1924.11)   | 945.36<br>(846.02 – 1022.61)     | 466.42<br>(421.84 – 506.57)    | 478.94<br>(412.08 – 529.35)    | 29,545.28<br>(26,678.39 – 32,187.60)    | 14,671.57<br>(13,294.60 – 16,098.76)    | 14,873.71<br>(13,102.69 – 16,560.59)  |
| Tajikistan                    | 761.02<br>(667.80 – 854.18)          | 418.11<br>(364.44 – 479.95)    | 342.91<br>(301.11 – 390.98)    | 212.32<br>(150.04 – 287.77)      | 105.63<br>(60.26 – 164.51)     | 106.69<br>(72.80 – 150.86)     | 8099.04<br>(5901.39 – 10,920.35)        | 4129.71<br>(2485.66 – 6547.90)          | 3969.34<br>(2840.38 – 5424.45)        |
| Thailand                      | 12,269.69<br>(10,909.05 – 14,011.31) | 6298.93<br>(5568.43 – 7208.36) | 5970.76<br>(5255.81 – 6927.66) | 8543.31<br>(6551.23 – 10,927.66) | 4517.17<br>(3212.70 – 6106.95) | 4026.14<br>(2888.98 – 5298.93) | 233,062.81<br>(183,333.81 – 302,013.56) | 136,342.07<br>(101,956.59 – 184,277.50) | 96,720.74<br>(75,135.19 – 123,182.82) |
| Timor-Leste                   | 92.56<br>(80.63 – 104.85)            | 45.55<br>(39.39 – 52.15)       | 47.01<br>(41.10 – 53.43)       | 53.86<br>(30.59 – 95.44)         | 25.59<br>(12.68 – 58.94)       | 28.27<br>(15.55 – 49.33)       | 1924.13<br>(1235.21 – 3120.90)          | 980.87<br>(567.20 – 1937.43)            | 943.26<br>(557.12 – 1502.53)          |
| Togo                          | 334.96<br>(288.49 – 387.04)          | 184.4<br>(158.34 – 214.46)     | 150.56<br>(127.67 – 174.97)    | 140.56<br>(57.97 – 361.35)       | 78.04<br>(19.05 – 286.37)      | 62.52<br>(33.61 – 156.76)      | 5987.71<br>(2824.42 – 13,839.38)        | 3476.41<br>(1128.42 – 11,140.56)        | 2511.3<br>(1486.44 – 5449.89)         |
| Tokelau                       | 0.19<br>(0.17 – 0.21)                | 0.08<br>(0.07 – 0.09)          | 0.11<br>(0.10 – 0.13)          | 0.11<br>(0.08 – 0.16)            | 0.05<br>(0.03 – 0.08)          | 0.07<br>(0.05 – 0.09)          | 4.36<br>(3.40 – 6.03)                   | 1.94<br>(1.27 – 3.28)                   | 2.42<br>(1.73 – 3.05)                 |

|                       |                                |                                |                                |                                |                                |                                |                                       |                                      |                                      |
|-----------------------|--------------------------------|--------------------------------|--------------------------------|--------------------------------|--------------------------------|--------------------------------|---------------------------------------|--------------------------------------|--------------------------------------|
| Tonga                 | 9.05<br>(8.05 – 10.15)         | 3.99<br>(3.50 – 4.54)          | 5.06<br>(4.47 – 5.71)          | 3.18<br>(2.18 – 4.69)          | 1.20<br>(0.75 – 2.15)          | 1.98<br>(1.35 – 2.95)          | 119.85<br>(87.23 – 169.30)            | 55.81<br>(37.09 – 92.45)             | 64.04<br>(47.12 – 87.18)             |
| Trinidad and<br>Tbago | 166.61<br>(148.85 – 189.43)    | 73.76<br>(65.76 – 83.99)       | 92.85<br>(82.09 – 106.03)      | 90.64<br>(69.45 – 115.83)      | 44.68<br>(33.49 – 58.32)       | 45.96<br>(35.66 – 58.43)       | 2965.92<br>(2321.28 – 3758.70)        | 1514.37<br>(1153.62 – 1954.36)       | 1451.55<br>(1136.25 – 1837.00)       |
| Tunisia               | 767.91<br>(664.31 – 875.11)    | 363.58<br>(315.39 – 418.66)    | 404.33<br>(345.11 – 464.54)    | 263.35<br>(139.40 – 445.55)    | 121.21<br>(53.86 – 230.81)     | 142.14<br>(74.39 – 252.20)     | 7970.29<br>(4964.27 – 12,533.00)      | 3625.55<br>(2016.48 – 6626.64)       | 4344.74<br>(2776.24 – 7083.32)       |
| Turkey                | 6169.61<br>(5446.59 – 6954.53) | 2920.49<br>(2556.81 – 3299.99) | 3249.12<br>(2844.71 – 3713.89) | 3415.29<br>(2636.05 – 4257.15) | 1773.91<br>(1269.21 – 2407.07) | 1641.38<br>(1220.45 – 2178.43) | 99,852.48<br>(80,291.96 – 123,128.32) | 52,869.42<br>(39,709.85 – 69,296.15) | 46,983.05<br>(36,856.65 – 59,660.54) |
| Turkmenistan          | 563.93<br>(503.34 – 631.09)    | 318.47<br>(279.99 – 362.41)    | 245.46<br>(219.98 – 276.74)    | 350.16<br>(262.27 – 495.80)    | 210.56<br>(143.16 – 351.51)    | 139.59<br>(85.11 – 192.55)     | 12,388.27<br>(9440.57 – 16,975.60)    | 7762.46<br>(5420.33 – 12,377.87)     | 4625.80<br>(2896.96 – 6368.75)       |
| Tuvalu                | 1.85<br>(1.64 – 2.08)          | 0.89<br>(0.77 – 1.01)          | 0.96<br>(0.85 – 1.11)          | 1.05<br>(0.68 – 1.52)          | 0.50<br>(0.28 – 0.87)          | 0.55<br>(0.33 – 0.82)          | 40.50<br>(27.75 – 56.76)              | 22.00<br>(13.26 – 35.70)             | 18.50<br>(11.95 – 26.33)             |
| Uganda                | 1607.48<br>(1384.23 – 1857.58) | 925.08<br>(795.16 – 1073.65)   | 682.39<br>(581.75 – 799.13)    | 399.37<br>(148.12 – 1058.35)   | 273.93<br>(74.44 – 917.85)     | 125.44<br>(63.18 – 319.28)     | 17,762.41<br>(8,210.98 – 42,884.09)   | 12,131.48<br>(4,260.48 – 36,992.55)  | 5630.94<br>(3410.45 – 12,175.08)     |
| Ukraine               | 5676.21<br>(5004.12 – 6503.61) | 2848.57<br>(2488.26 – 3290.37) | 2827.64<br>(2485.49 – 3258.87) | 3645.61<br>(2770.94 – 4573.76) | 1686.33<br>(1147.26 – 2301.37) | 1959.29<br>(1367.09 – 2723.78) | 94,973.97<br>(71,883.26 – 118,614.15) | 51,040.73<br>(34,805.97 – 69,218.29) | 43,933.25<br>(30,651.32 – 60,287.28) |

|                              |                                      |                                      |                                      |                                      |                                |                                    |                                         |                                         |                                         |
|------------------------------|--------------------------------------|--------------------------------------|--------------------------------------|--------------------------------------|--------------------------------|------------------------------------|-----------------------------------------|-----------------------------------------|-----------------------------------------|
| United Arab Emirates         | 542.19<br>(427.08 – 668.26)          | 357.92<br>(277.53 – 452.73)          | 184.27<br>(148.73 – 224.12)          | 108.02<br>(79.68 – 143.28)           | 66.52<br>(46.52 – 94.57)       | 41.50<br>(28.73 – 56.21)           | 5088.33<br>(4053.37 – 6405.76)          | 3293.14<br>(2506.10 – 4399.25)          | 1795.19<br>(1380.55 – 2303.95)          |
| United Kingdom               | 7198.45<br>(6369.08 – 8166.66)       | 2854.47<br>(2493.45 – 3270.10)       | 4343.98<br>(3851.66 – 4923.13)       | 3927.12<br>(3515.88 – 4140.82)       | 1546.37<br>(1442.48 – 1606.16) | 2380.75<br>(2077.43 – 2543.75)     | 91,480.24<br>(86,290.63 – 96,130.90)    | 37,995.65<br>(36,109.53 – 39,698.69)    | 53,484.60<br>(49,748.35 – 56,667.98)    |
| United Republic of Tanzania  | 2552.67<br>(2192.55 – 2944.60)       | 1441.15<br>(1232.44 – 1676.09)       | 1111.52<br>(944.51 – 1299.34)        | 625.34<br>(244.56 – 1704.66)         | 380.27<br>(92.42 – 1457.43)    | 245.07<br>(122.84 – 555.52)        | 26,522.26<br>(12,745.68 – 64,684.43)    | 16,351.04<br>(5779.16 – 54,275.74)      | 10,171.22<br>(5962.75 – 19,912.03)      |
| United States of America     | 29,757.84<br>(26,203.88 – 34,291.00) | 12,307.46<br>(10,763.88 – 14,120.81) | 17,450.38<br>(15,245.10 – 20,223.94) | 18,044.53<br>(16,291.84 – 19,093.20) | 7470.84<br>(6947.25 – 7859.94) | 10,573.69<br>(9288.51 – 11,332.28) | 481,261.46<br>(452,792.89 – 508,845.19) | 203,350.05<br>(192,684.85 – 214,164.26) | 277,911.41<br>(257,859.64 – 295,747.98) |
| United States Virgin Islands | 12.78<br>(11.25 – 14.51)             | 5.48<br>(4.81 – 6.24)                | 7.30<br>(6.36 – 8.49)                | 3.97<br>(2.99 – 5.13)                | 2.03<br>(1.46 – 2.88)          | 1.93<br>(1.38 – 2.72)              | 120.07<br>(92.64 – 152.59)              | 60.96<br>(44.97 – 83.23)                | 59.11<br>(44.21 – 80.40)                |
| Uruguay                      | 608.58<br>(548.13 – 679.35)          | 212.39<br>(190.68 – 240.81)          | 396.20<br>(349.54 – 446.55)          | 354.16<br>(324.52 – 381.12)          | 129.95<br>(117.80 – 141.05)    | 224.21<br>(200.40 – 244.04)        | 9603.19<br>(8914.60 – 10,263.93)        | 3835.65<br>(3504.47 – 4160.03)          | 5767.54<br>(5315.75 – 6207.58)          |
| Uzbekistan                   | 2063.02<br>(1793.11 – 2334.85)       | 1130.39<br>(971.59 – 1284.06)        | 932.63<br>(796.37 – 1061.39)         | 1094.56<br>(914.44 – 1327.23)        | 660.80<br>(546.11 – 818.11)    | 433.76<br>(362.67 – 519.56)        | 34,891.39<br>(29,824.73 – 41,371.44)    | 21,603.58<br>(18,264.89 – 26,071.36)    | 13,287.81<br>(11,365.10 – 15,667.70)    |
| Vanuatu                      | 40.13<br>(35.50 – 45.04)             | 20.50<br>(18.01 – 23.41)             | 19.62<br>(17.24 – 22.13)             | 18.69<br>(11.65 – 27.60)             | 10.42<br>(5.99 – 18.19)        | 8.26<br>(3.52 – 12.92)             | 846.60<br>(572.56 – 1223.17)            | 500.83<br>(312.66 – 815.10)             | 345.76<br>(180.65 – 525.60)             |

|                                          |                          |                     |                        |                        |                         |                        |                              |                             |                             |
|------------------------------------------|--------------------------|---------------------|------------------------|------------------------|-------------------------|------------------------|------------------------------|-----------------------------|-----------------------------|
| Venezuela                                | 3643.01                  | 1388.36             | 2254.66                | 1627.65                | 648.84                  | 978.80                 | 55,022.54                    | 22,348.21                   | 32,674.33                   |
| (Bolivarian<br>Republic of<br>Venezuela) | (3244.55 –<br>4223.40)   | (1211.25 – 1602.81) | (1981.51 –<br>2622.87) | (1206.80 –<br>2110.47) | (471.04 – 866.30)       | (707.21 –<br>1280.83)  | (41,131.60 –<br>70,454.58)   | (16,629.98 –<br>29,472.14)  | (24,107.52 –<br>42,362.36)  |
| Viet Nam                                 | 10,871.03                | 5594.07             | 5276.96                | 4925.50                | 2596.26                 | 2329.24                | 158,571.90                   | 91,624.28                   | 66,947.61                   |
|                                          | (9514.81 –<br>12,535.68) | (4845.55 – 6518.70) | (4607.13 –<br>6076.13) | (2830.24 –<br>8829.73) | (1287.50 – 4<br>905.39) | (1389.51 –<br>4700.93) | (105,632.77 –<br>248,409.91) | (52,638.78 –<br>154,717.37) | (47,676.90 –<br>110,889.03) |
| Yemen                                    | 1615.19                  | 765.69              | 849.50                 | 784.65                 | 410.71                  | 373.94                 | 29,475.80                    | 14,789.09                   | 14,686.71                   |
|                                          | (1418.98 –<br>1807.11)   | (669.39 – 868.09)   | (738.55 – 963.29)      | (373.99 –<br>1445.49)  | (144.74 – 895.80)       | (156.48 – 783.64)      | (15,799.29 –<br>48,741.58)   | (6322.19 – 28,833.65)       | (6,905.98 –<br>26,860.15)   |
| Zambia                                   | 842.93                   | 506.59              | 336.34                 | 281.59                 | 172.36                  | 109.23                 | 11,534.78                    | 7161.02                     | 4373.76                     |
|                                          | (718.60 – 971.98)        | (434.63 – 589.13)   | (284.26 – 391.71)      | (124.51 – 591.04)      | (57.79 – 478.24)        | (57.99 – 257.97)       | (5692.32 – 22,740.92)        | (2797.97 – 18,274.02)       | (2632.14 –<br>9406.17)      |
| Zimbabwe                                 | 865.10                   | 463.08              | 402.01                 | 444.33                 | 235.70                  | 208.62                 | 17,404.23                    | 9809.48                     | 7594.75                     |
|                                          | (754.11 – 985.62)        | (404.11 – 528.06)   | (345.84 – 468.47)      | (293.58 – 708.67)      | (145.32 – 414.30)       | (126.78 – 338.31)      | (11,843.38 –<br>26,503.73)   | (6499.23 – 16,427.68)       | (4812.69 –<br>11,566.36)    |

---

*DALYs* disability-adjusted life-years, *UI* uncertainty interval

**Table S7** ASIR, ASMR, and ASDR for subarachnoid hemorrhage (SAH) in 204 countries in 2021

| Location            | ASIR/100,000 persons (95% UI) |                         |                          | ASMR/100,000 persons (95% UI) |                        |                        | ASDR/100,000 persons (95% UI) |                             |                             |
|---------------------|-------------------------------|-------------------------|--------------------------|-------------------------------|------------------------|------------------------|-------------------------------|-----------------------------|-----------------------------|
|                     | Both                          | Male                    | Female                   | Both                          | Male                   | Female                 | Both                          | Male                        | Female                      |
| Afghanistan         | 8.88<br>(7.88 – 10.14)        | 8.94<br>(7.80 – 10.27)  | 8.86<br>(7.90 – 10.08)   | 6.60<br>(3.24 – 11.83)        | 7.76<br>(2.46 – 16.74) | 5.52<br>(1.49 – 10.12) | 186.26<br>(101.62 – 309.66)   | 209.59<br>(83.69 – 420.17)  | 165.42<br>(52.85 – 266.91)  |
| Albania             | 6.73<br>(5.93 – 7.56)         | 6.92<br>(6.04 – 7.75)   | 6.61<br>(5.75 – 7.42)    | 2.49<br>(1.61 – 3.46)         | 2.34<br>(1.34 – 3.66)  | 2.61<br>(1.61 – 3.92)  | 69.05<br>(50.78 – 91.71)      | 65.92<br>(42.56 – 95.86)    | 71.75<br>(49.16 – 102.32)   |
| Algeria             | 6.27<br>(5.48 – 7.07)         | 6.06<br>(5.30 – 6.85)   | 6.44<br>(5.55 – 7.32)    | 2.60<br>(1.72 – 3.95)         | 2.22<br>(1.25 – 3.94)  | 3.14<br>(1.71 – 4.97)  | 69.50<br>(48.57 – 99.79)      | 59.10<br>(36.61 – 100.26)   | 81.47<br>(52.34 – 127.29)   |
| American Samoa      | 11.56<br>(10.39 – 12.83)      | 10.65<br>(9.47 – 11.98) | 12.38<br>(11.09 – 13.96) | 6.03<br>(4.83 – 7.57)         | 4.85<br>(3.56 – 6.66)  | 7.07<br>(5.41 – 9.21)  | 202.28<br>(164.02 – 251.73)   | 195.44<br>(149.58 – 260.78) | 207.59<br>(161.59 – 261.46) |
| Andorra             | 6.10<br>(5.27 – 6.98)         | 5.19<br>(4.42 – 6.06)   | 7.08<br>(6.13 – 8.02)    | 1.80<br>(1.22 – 2.44)         | 1.12<br>(0.64 – 1.62)  | 2.47<br>(1.59 – 3.50)  | 57.46<br>(41.75 – 75.52)      | 38.68<br>(26.40 – 52.26)    | 77.28<br>(54.56 – 104.80)   |
| Angola              | 6.31<br>(5.46 – 7.40)         | 7.11<br>(6.06 – 8.25)   | 5.67<br>(4.85 – 6.71)    | 2.74<br>(1.43 – 5.16)         | 3.31<br>(1.20 – 8.33)  | 2.31<br>(1.43 – 4.93)  | 88.71<br>(50.99 – 154.18)     | 104.45<br>(46.28 – 234.63)  | 75.47<br>(51.27 – 139.61)   |
| Antigua and Barbuda | 10.34<br>(9.19 – 11.48)       | 9.54<br>(8.42 – 10.66)  | 11.19<br>(9.88 – 12.66)  | 3.99<br>(3.71 – 4.30)         | 4.12<br>(3.75 – 4.56)  | 3.95<br>(3.62 – 4.31)  | 118.60<br>(110.98 – 127.41)   | 114.75<br>(104.41 – 125.55) | 122.69<br>(113.55 – 133.57) |
| Argentina           | 10.86<br>(9.70 – 12.25)       | 9.49<br>(8.49 – 10.73)  | 12.18<br>(10.70 – 13.90) | 4.06<br>(3.72 – 4.34)         | 4.17<br>(3.80 – 4.51)  | 4.01<br>(3.62 – 4.36)  | 134.14<br>(124.15 – 143.62)   | 132.47<br>(121.54 – 144.07) | 136.28<br>(125.94 – 147.98) |
| Armenia             | 6.16<br>(5.46 – 6.90)         | 7.03<br>(6.25 – 7.84)   | 5.42<br>(4.65 – 6.17)    | 2.34<br>(2.08 – 2.64)         | 2.96<br>(2.63 – 3.32)  | 1.83<br>(1.58 – 2.08)  | 71.12<br>(63.51 – 80.44)      | 92.59<br>(82.77 – 103.61)   | 52.82<br>(46.08 – 60.61)    |

|            |                          |                          |                         |                        |                        |                        |                             |                             |                             |
|------------|--------------------------|--------------------------|-------------------------|------------------------|------------------------|------------------------|-----------------------------|-----------------------------|-----------------------------|
| Australia  | 6.11<br>(5.37 – 6.92)    | 5.21<br>(4.55 – 5.94)    | 6.98<br>(6.04 – 8.05)   | 2.38<br>(2.13 – 2.59)  | 2.30<br>(2.08 – 2.52)  | 2.46<br>(2.14 – 2.70)  | 70.06<br>(64.90 – 75.38)    | 65.21<br>(60.33 – 70.40)    | 74.54<br>(67.84 – 81.71)    |
| Austria    | 8.86<br>(7.58 – 10.19)   | 8.19<br>(6.95 – 9.50)    | 9.52<br>(8.04 – 10.98)  | 2.22<br>(1.98 – 2.42)  | 2.11<br>(1.89 – 2.30)  | 2.32<br>(2.00 – 2.58)  | 71.68<br>(64.60 – 78.56)    | 65.92<br>(59.64 – 72.33)    | 76.82<br>(68.82 – 85.49)    |
| Azerbaijan | 5.85<br>(5.03 – 6.68)    | 6.14<br>(5.26 – 7.06)    | 5.53<br>(4.72 – 6.37)   | 1.10<br>(0.74 – 1.57)  | 1.18<br>(0.66 – 1.90)  | 1.03<br>(0.56 – 1.67)  | 39.40<br>(29.64 – 51.87)    | 41.36<br>(27 – 61.29)       | 37.44<br>(26.61 – 53.09)    |
| Bahamas    | 8.97<br>(7.98 – 9.97)    | 8.14<br>(7.20 – 9.08)    | 9.76<br>(8.55 – 11.01)  | 3.31<br>(2.70 – 4.08)  | 3.36<br>2.73 – 4.15    | 3.28<br>(2.69 – 4.07)  | 115.57<br>(94.93 – 141.03)  | 115.16<br>(94.13 – 143.51)  | 115.71<br>(94.78 – 141.63)  |
| Bahrain    | 4.48<br>(3.90 – 5.04)    | 4.38<br>(3.78 – 4.97)    | 4.72<br>(4.09 – 5.35)   | 1.99<br>(1.45 – 2.51)  | 1.96<br>(1.09 – 2.82)  | 2.09<br>(1.57 – 2.90)  | 52.26<br>(41.52 – 63.45)    | 49.39<br>(33.95 – 66.97)    | 57.26<br>(45.42 – 74.29)    |
| Bangladesh | 12.74<br>(11.31 – 14.63) | 15.27<br>(13.49 – 17.39) | 10.35<br>(8.97 – 11.96) | 7.93<br>(4.69 – 13.16) | 9.15<br>(3.86 – 19.57) | 6.74<br>(4.34 – 12.00) | 243.46<br>(154.02 – 386.81) | 299.85<br>(147.80 – 589.48) | 190.56<br>(128.77 – 302)    |
| Barbados   | 10.24<br>(9.21 – 11.50)  | 10.01<br>(8.93 – 11.28)  | 10.49<br>(9.30 – 11.94) | 4.69<br>(3.74 – 5.82)  | 4.96<br>(3.90 – 6.24)  | 4.49<br>(3.54 – 5.60)  | 144.16<br>(114.34 – 179.24) | 148.79<br>(117.25 – 189.32) | 140.18<br>(111.44 – 176.76) |
| Belarus    | 7.36<br>(6.57 – 8.19)    | 8.06<br>(7.17 – 9.08)    | 6.70<br>(5.93 – 7.57)   | 3.93<br>(3.19 – 4.68)  | 5.27<br>(4.32 – 6.38)  | 2.96<br>(2.40 – 3.50)  | 123.73<br>(101.18 – 146.64) | 164.45<br>(133.10 – 197.23) | 90.30<br>(74.37 – 106.39)   |
| Belgium    | 5.72<br>(5.02 – 6.53)    | 5.30<br>(4.68 – 5.96)    | 6.20<br>(5.35 – 7.16)   | 2.31<br>(2.09 – 2.49)  | 2.39<br>(2.18 – 2.59)  | 2.28<br>(2.00 – 2.55)  | 67.19<br>(62.95 – 72.38)    | 65.12<br>(60.39 – 70.30)    | 69.69<br>(63.87 – 76.43)    |
| Belize     | 8.43<br>(7.49 – 9.44)    | 7.51<br>(6.65 – 8.42)    | 9.34<br>(8.27 – 10.56)  | 2.73<br>(2.39 – 3.10)  | 2.52<br>(2.16 – 2.92)  | 2.94<br>(2.57 – 3.31)  | 92.36<br>(81.22 – 103.89)   | 86.10<br>(74.20 – 99.57)    | 98.71<br>(87.08 – 111.53)   |
| Benin      | 5.41<br>(4.70 – 6.35)    | 6.20<br>(5.37 – 7.15)    | 4.72<br>(3.99 – 5.59)   | 2.60<br>(1.22 – 6.16)  | 2.70<br>(0.73 – 10.08) | 2.49<br>(1.41 – 5.60)  | 84.74<br>(44.30 – 183.61)   | 92.30<br>(33.70 – 303.30)   | 77.35<br>(48.79 – 155.28)   |



|                                                |                          |                          |                          |                        |                        |                         |                             |                             |                             |
|------------------------------------------------|--------------------------|--------------------------|--------------------------|------------------------|------------------------|-------------------------|-----------------------------|-----------------------------|-----------------------------|
| Bermuda                                        | 8.64<br>(7.54 – 9.71)    | 8.34<br>(7.30 – 9.28)    | 9.04<br>(7.73 – 10.38)   | 2.24<br>(1.89 – 2.70)  | 3.14<br>(2.65 – 3.80)  | 1.51<br>(1.24 – 1.90)   | 72.39<br>(61.63 – 86.07)    | 91.28<br>(76.77 – 108.23)   | 55.76<br>(46.52 – 66.15)    |
| Bhutan                                         | 7.64<br>(6.68 – 8.71)    | 7.89<br>(6.80 – 9.05)    | 7.38<br>(6.48 – 8.43)    | 3.68<br>(2.44 – 5.58)  | 3.66<br>(1.90 – 6.88)  | 3.70<br>(2.38 – 5.66)   | 114.23<br>(78.27 – 170.02)  | 114.23<br>(64.30 – 204.19)  | 114.16<br>(76.21 – 170.24)  |
| Bolivia<br>(Plurinational<br>State of Bolivia) | 14.43<br>(12.86 – 16.20) | 12.02<br>(10.55 – 13.52) | 16.71<br>(14.80 – 19.03) | 9.70<br>(6.98 – 13.63) | 7.12<br>(4.65 – 10.17) | 11.98<br>(8.02 – 17.33) | 300.13<br>(219.35 – 411.66) | 234.42<br>(162.75 – 325.88) | 359.90<br>(249.22 – 515.21) |
| Bosnia and<br>Herzegovina                      | 7.73<br>(6.93 – 8.59)    | 7.57<br>(6.78 – 8.46)    | 7.92<br>(7.05 – 8.84)    | 3.25<br>(2.38 – 4.21)  | 3.19<br>(2.14 – 4.53)  | 3.28<br>(2.35 – 4.33)   | 102.57<br>(77.01 – 130.54)  | 100.70<br>(69.44 – 140.09)  | 103.86<br>(77.63 – 133.43)  |
| Botswana                                       | 5.86<br>(5.12 – 6.74)    | 6.29<br>(5.44 – 7.32)    | 5.58<br>(4.84 – 6.49)    | 1.34<br>(0.93 – 2.21)  | 1.55<br>(0.93 – 3.01)  | 1.17<br>(0.81 – 2.18)   | 46.75<br>(33.73 – 72.24)    | 53.35<br>(34.98 – 101.50)   | 40.68<br>(30.67 – 68.33)    |
| Brazil                                         | 10.20<br>(8.84 – 11.81)  | 8.64<br>(7.47 – 9.97)    | 11.65<br>(10.06 – 13.57) | 5.45<br>(5.12 – 5.68)  | 4.62<br>(4.36 – 4.87)  | 6.19<br>(5.72 – 6.53)   | 177.61<br>(169.76 – 184.33) | 147.19<br>(140.13 – 154.67) | 204.89<br>(194.17 – 214.64) |
| Brunei<br>Darussalam                           | 15.60<br>(13.78 – 17.87) | 12.43<br>(10.70 – 14.52) | 18.34<br>(16.04 – 21.30) | 7.00<br>(5.73 – 8.50)  | 5.57<br>(4.20 – 7.46)  | 8.23<br>(6.41 – 10.28)  | 224.11<br>(188.53 – 267.80) | 196.73<br>(152.17 – 259.19) | 247.95<br>(201.13 – 299.61) |
| Bulgaria                                       | 8.32<br>(7.54 – 9.13)    | 8.82<br>(7.87 – 9.81)    | 7.96<br>(7.18 – 8.74)    | 5.09<br>(4.38 – 5.86)  | 5.66<br>(4.82 – 6.58)  | 4.62<br>(3.99 – 5.36)   | 154.16<br>(132.14 – 178.07) | 169.73<br>(144.36 – 198.67) | 139.96<br>(119.41 – 161.15) |
| Burkina Faso                                   | 5.00<br>(4.31 – 5.83)    | 5.68<br>(4.87 – 6.66)    | 4.42<br>(3.76 – 5.23)    | 2.25<br>(0.82 – 5.81)  | 3.08<br>(0.71 – 10.68) | 1.51<br>(0.79 – 3.70)   | 76.70<br>(34.78 – 176.90)   | 103.14<br>(33.48 – 314.74)  | 52.56<br>(33.08 – 108.35)   |
| Burundi                                        | 7.99<br>(6.86 – 9.49)    | 9.39<br>(7.97 – 11.15)   | 6.58<br>(5.58 – 7.87)    | 3.76<br>(0.85 – 13.92) | 5.10<br>(0.68 – 24.70) | 2.41<br>(0.93 – 8.27)   | 119.38<br>(37.30 – 389.51)  | 155.25<br>(32.85 – 663.13)  | 81.13<br>(39.71 – 228.46)   |

|                             |                          |                          |                          |                        |                        |                        |                             |                             |                             |
|-----------------------------|--------------------------|--------------------------|--------------------------|------------------------|------------------------|------------------------|-----------------------------|-----------------------------|-----------------------------|
| Côte d'Ivoire               | 5.07<br>(4.37 – 5.84)    | 5.68<br>(4.88 – 6.55)    | 4.43<br>(3.75 – 5.21)    | 2.45<br>(1.19 – 5.34)  | 2.73<br>(0.92 – 8.62)  | 2.12<br>(1.31 – 4.47)  | 87.78<br>(48.28 – 175.32)   | 102.29<br>(43.34 – 278.10)  | 71.25<br>(47.95 – 133.71)   |
| Cabo Verde                  | 5.18<br>(4.36 – 6.08)    | 5.58<br>(4.77 – 6.47)    | 4.88<br>(3.99 – 5.82)    | 1.66<br>(0.81 – 3.81)  | 1.95<br>(0.70 – 6.69)  | 1.36<br>(0.74 – 3.37)  | 62.53<br>(36.17 – 135.13)   | 74.46<br>(32.71 – 220.39)   | 49.99<br>(32.90 – 103.76)   |
| Cambodia                    | 10.80<br>(9.55 – 12.18)  | 10.34<br>(9.09 – 11.68)  | 11.20<br>(9.91 – 12.81)  | 5.88<br>(4.20 – 10.09) | 5.29<br>(3.39 – 9.61)  | 6.19<br>(4.32 – 10.85) | 165.54<br>(122.80 – 242.74) | 155.18<br>(105.68 – 255.96) | 170.76<br>(124.35 – 257.70) |
| Cameroon                    | 5.27<br>(4.56 – 6.14)    | 5.99<br>(5.19 – 7.02)    | 4.61<br>(3.91 – 5.38)    | 2.80<br>(1.27 – 6.19)  | 3.26<br>(0.99 – 9.72)  | 2.36<br>(1.30 – 5.32)  | 97.33<br>(48.64 – 195.34)   | 116.35<br>(44.28 – 310.22)  | 78.64<br>(48.18 – 153.59)   |
| Canada                      | 7.03<br>(6.11 – 8.04)    | 5.90<br>(5.15 – 6.75)    | 8.14<br>(6.93 – 9.45)    | 2.36<br>(2.13 – 2.55)  | 2.24<br>(2.02 – 2.45)  | 2.47<br>(2.18 – 2.71)  | 76.13<br>(69.97 – 82.49)    | 69.67<br>(63.95 – 75.54)    | 82.01<br>(74.43 – 89.56)    |
| Central African<br>Republic | 7.50<br>(6.45 – 8.84)    | 8.75<br>(7.53 – 10.27)   | 6.54<br>(5.58 – 7.78)    | 4.49<br>(1.55 – 11.58) | 5.92<br>(1.24 – 19.89) | 3.40<br>(1.44 – 9.43)  | 141.68<br>(57.82 – 314.50)  | 183.26<br>(51.72 – 529.94)  | 105.63<br>(51.92 – 243.45)  |
| Chad                        | 5.67<br>(4.90 – 6.60)    | 6.41<br>(5.53 – 7.44)    | 4.91<br>(4.22 – 5.78)    | 3.45<br>(1.34 – 8.47)  | 3.80<br>(0.93 – 13.40) | 3.10<br>(1.67 – 6.79)  | 117.76<br>(52.85 – 264.50)  | 135.53<br>(45.26 – 428.69)  | 100.31<br>(59.08 – 199.65)  |
| Chile                       | 9.61<br>(8.46 – 10.82)   | 7.66<br>(6.61 – 8.67)    | 11.40<br>(9.98 – 13.06)  | 3.79<br>(3.50 – 4.08)  | 3.66<br>(3.36 – 4.00)  | 3.91<br>(3.54 – 4.27)  | 120.38<br>(112.85 – 129.21) | 114.32<br>(104.88 – 123.67) | 125.87<br>(116.27 – 136.73) |
| China                       | 7.81<br>(6.88 – 8.95)    | 8.78<br>(7.67 – 10.15)   | 6.95<br>(6.06 – 7.92)    | 4.72<br>(3.45 – 5.95)  | 5.68<br>(3.31 – 7.93)  | 4.02<br>(2.76 – 5.43)  | 115.49<br>(86.86 – 142.50)  | 133.36<br>(84.49 – 181.13)  | 99.70<br>(73.36 – 130.60)   |
| Colombia                    | 13.97<br>(12.55 – 15.71) | 11.80<br>(10.43 – 13.42) | 15.85<br>(14.02 – 17.98) | 6.09<br>(5.08 – 7.19)  | 5.43<br>(4.45 – 6.53)  | 6.62<br>(5.54 – 7.80)  | 184.51<br>(155.49 – 217.65) | 166.35<br>(138.46 – 198.16) | 199.23<br>(168.05 – 232.34) |
| Comoros                     | 7.36<br>(6.39 – 8.62)    | 8.58<br>(7.43 – 10.11)   | 6.27<br>(5.37 – 7.45)    | 2.63<br>(1.07 – 6.33)  | 3.22<br>(0.75 – 10.95) | 2.12<br>(1.07 – 5.20)  | 88.71<br>(43.07 – 188.52)   | 105.73<br>(33.82 – 311.80)  | 72.99<br>(44.57 – 152.96)   |

|                                                |                          |                          |                         |                        |                        |                        |                             |                             |                             |
|------------------------------------------------|--------------------------|--------------------------|-------------------------|------------------------|------------------------|------------------------|-----------------------------|-----------------------------|-----------------------------|
| Congo                                          | 6.17<br>(5.35 – 7.09)    | 6.72<br>(5.77 – 7.74)    | 5.71<br>(4.91 – 6.68)   | 2.69<br>(1.45 – 5.27)  | 2.69<br>(0.96 – 7.22)  | 2.70<br>(1.69 – 5.63)  | 87.67<br>(51.87 – 155.51)   | 87.63<br>(38.14 – 208.30)   | 87.83<br>(57.82 – 166.36)   |
| Cook Islands                                   | 9.90<br>(8.77 – 11.05)   | 9.57<br>(8.32 – 10.91)   | 10.21<br>(8.99 – 11.52) | 2.83<br>(1.87 – 3.90)  | 2.68<br>(1.62 – 3.93)  | 2.92<br>(1.78 – 4.48)  | 113.54<br>(86.33 – 144.32)  | 122.29<br>(83.55 – 167.92)  | 105.96<br>(77.35 – 145.18)  |
| Costa Rica                                     | 10.25<br>(8.95 – 11.66)  | 9.07<br>(7.91 – 10.48)   | 11.32<br>(9.73 – 12.96) | 3.65<br>(3.16 – 4.04)  | 3.64<br>(3.15 – 4.05)  | 3.65<br>(3.15 – 4.13)  | 117.80<br>(104.96 – 129.08) | 116.54<br>(103.00 – 129.22) | 118.69<br>(104.38 – 132.05) |
| Croatia                                        | 5.93<br>(5.34 – 6.60)    | 5.72<br>(5.06 – 6.44)    | 6.13<br>(5.53 – 6.88)   | 3.39<br>(2.95 – 3.91)  | 3.48<br>(3.01 – 4.03)  | 3.29<br>(2.83 – 3.78)  | 93.44<br>(82.06 – 106.54)   | 95.56<br>(83.67 – 109.43)   | 91.18<br>(78.65 – 105.33)   |
| Cuba                                           | 8.44<br>(7.42 – 9.54)    | 7.31<br>(6.43 – 8.25)    | 9.56<br>(8.35 – 11.02)  | 2.79<br>(2.39 – 3.17)  | 2.61<br>(2.22 – 3.04)  | 2.94<br>(2.50 – 3.40)  | 91.85<br>(80.29 – 103.71)   | 85.42<br>(73.37 – 98.66)    | 97.56<br>(84.53 – 112.17)   |
| Cyprus                                         | 7.01<br>(6.13 – 7.98)    | 6.71<br>(5.82 – 7.71)    | 7.25<br>(6.26 – 8.33)   | 2.65<br>(2.11 – 3.36)  | 2.44<br>(1.78 – 3.20)  | 2.74<br>(2.03 – 3.55)  | 68.28<br>(56.81 – 81.96)    | 66.26<br>(51.35 – 84.27)    | 69.20<br>(56.59 – 84.39)    |
| Czechia                                        | 6.11<br>(5.35 – 6.81)    | 6.15<br>(5.39 – 6.90)    | 6.10<br>(5.30 – 6.89)   | 2.30<br>(2.01 – 2.64)  | 2.30<br>(1.99 – 2.63)  | 2.31<br>(2.00 – 2.66)  | 73.74<br>(64.69 – 84.50)    | 70.61<br>(60.87 – 79.99)    | 76.91<br>(67.21 – 88.84)    |
| Democratic<br>People's<br>Republic of<br>Korea | 11.65<br>(10.29 – 13.04) | 13.34<br>(11.67 – 15.12) | 10.79<br>(9.51 – 12.19) | 7.72<br>(4.65 – 14.04) | 8.76<br>(4.46 – 22.79) | 7.08<br>(4.41 – 11.88) | 216.33<br>(136.18 – 370.31) | 238.75<br>(132.87 – 541.67) | 198.52<br>(129.22 – 309.49) |
| Democratic<br>Republic of the<br>Congo         | 7.75<br>(6.67 – 9.12)    | 9.28<br>(7.93 – 10.99)   | 6.47<br>(5.51 – 7.72)   | 3.30<br>(1.08 – 10.89) | 4.25<br>(0.68 – 20.46) | 2.60<br>(1.22 – 7.31)  | 102.20<br>(42.99 – 302.44)  | 126.40<br>(31.62 – 540.51)  | 81.11<br>(44.90 – 198.66)   |
| Denmark                                        | 7.42<br>(6.51 – 8.47)    | 6.64<br>(5.65 – 7.60)    | 8.17<br>(7.10 – 9.46)   | 2.73<br>(2.47 – 2.95)  | 2.59<br>(2.32 – 2.83)  | 2.85<br>(2.53 – 3.12)  | 76.66<br>(70.56 – 81.99)    | 71.00<br>(64.50 – 77.11)    | 82.03<br>(75.23 – 89.18)    |

|                       |                          |                          |                          |                       |                        |                       |                             |                             |                             |
|-----------------------|--------------------------|--------------------------|--------------------------|-----------------------|------------------------|-----------------------|-----------------------------|-----------------------------|-----------------------------|
| Djibouti              | 7.49<br>(6.45 – 8.73)    | 8.77<br>(7.57 – 10.24)   | 6.09<br>(5.14 – 7.32)    | 2.83<br>(1.15 – 6.26) | 3.69<br>(1.18 – 10.42) | 1.88<br>(0.94 – 4.34) | 94.58<br>(44.72 – 194.76)   | 121.89<br>(46.59 – 308.79)  | 62.85<br>(37.71 – 127.25)   |
| Dominica              | 8.99<br>(7.91 – 10.12)   | 8.90<br>(7.83 – 10.06)   | 9.31<br>(8.08 – 10.59)   | 4.42<br>(3.56 – 5.39) | 4.97<br>(3.75 – 6.49)  | 4.00<br>(3.13 – 5.04) | 136.67<br>(113.11 – 166.88) | 146.93<br>(113.61 – 188.01) | 127.09<br>(100.80 – 158.85) |
| Dominican<br>Republic | 10.97<br>(9.68 – 12.47)  | 8.62<br>(7.57 – 9.81)    | 13.30<br>(11.67 – 15.39) | 4.04<br>(2.98 – 5.27) | 3.32<br>(2.28 – 4.79)  | 4.72<br>(3.32 – 6.51) | 146.74<br>(114.48 – 185.95) | 122.13<br>(86.09 – 167.31)  | 170.70<br>(126.51 – 229.28) |
| Ecuador               | 14.98<br>(13.58 – 16.91) | 13.47<br>(12.10 – 15.34) | 16.38<br>(14.53 – 18.74) | 7.69<br>(6.14 – 9.47) | 7.23<br>(5.71 – 9.28)  | 8.09<br>(6.40 – 9.94) | 234.98<br>(190.75 – 288.98) | 226.17<br>(181.86 – 289.46) | 242.30<br>(196.25 – 295.55) |
| Egypt                 | 5.52<br>(4.84 – 6.20)    | 5.06<br>(4.44 – 5.71)    | 6.00<br>(5.23 – 6.80)    | 2.99<br>(2.05 – 4.36) | 3.00<br>(1.86 – 4.76)  | 3.17<br>(1.82 – 5.56) | 83.75<br>(60.65 – 119.58)   | 86.60<br>(57.93 – 138.54)   | 82.63<br>(53.12 – 130.84)   |
| El Salvador           | 9.75<br>(8.67 – 10.93)   | 8.26<br>(7.28 – 9.25)    | 10.88<br>(9.63 – 12.39)  | 3.37<br>(2.57 – 4.34) | 2.86<br>(1.90 – 3.78)  | 3.73<br>(2.70 – 4.94) | 118.51<br>(93.68 – 147.91)  | 105.43<br>(70.53 – 137.47)  | 127.57<br>(97.29 – 163.78)  |
| Equatorial<br>Guinea  | 5.30<br>(4.51 – 6.21)    | 5.83<br>(4.94 – 6.79)    | 4.82<br>(4.06 – 5.75)    | 1.56<br>(0.78 – 2.63) | 1.65<br>(0.65 – 3.58)  | 1.48<br>(0.66 – 3.12) | 54.32<br>(30.08 – 83.95)    | 56.97<br>(27.94 – 109.37)   | 51.60<br>(28.03 – 98.49)    |
| Eritrea               | 8.20<br>(7.10 – 9.67)    | 9.44<br>(8.11 – 11.07)   | 7.21<br>(6.18 – 8.66)    | 3.84<br>(1.45 – 9.04) | 5.51<br>(1.24 – 18.03) | 2.69<br>(1.44 – 6.61) | 127.23<br>(54.59 – 272.81)  | 174.16<br>(50.64 – 496.55)  | 88.32<br>(52.48 – 186.04)   |
| Estonia               | 6.36<br>(5.57 – 7.12)    | 6.81<br>(5.96 – 7.62)    | 5.98<br>(5.17 – 6.78)    | 2.41<br>(2.08 – 2.71) | 3.47<br>(3.03 – 3.97)  | 1.65<br>(1.36 – 1.88) | 70.24<br>(61.16 – 79.30)    | 96.99<br>(85.21 – 110.54)   | 47.91<br>(41.36 – 54.51)    |
| Eswatini              | 5.57<br>(4.90 – 6.44)    | 6.40<br>(5.62 – 7.37)    | 5.05<br>(4.39 – 5.89)    | 2.32<br>(1.50 – 3.70) | 2.72<br>(1.54 – 4.84)  | 2.00<br>(1.18 – 3.30) | 75.24<br>(48.72 – 118.52)   | 90.16<br>(53.54 – 155.93)   | 62.46<br>(39.88 – 97.75)    |

|           |                          |                          |                          |                        |                         |                        |                             |                             |                             |
|-----------|--------------------------|--------------------------|--------------------------|------------------------|-------------------------|------------------------|-----------------------------|-----------------------------|-----------------------------|
| Ethiopia  | 6.55<br>(5.60 – 7.73)    | 8.02<br>(6.86 – 9.42)    | 5.05<br>(4.32 – 5.96)    | 2.15<br>(0.70 – 6.65)  | 2.88<br>(0.58 – 11.81)  | 1.41<br>(0.67 – 3.87)  | 70.39<br>(29.41 – 189.81)   | 90.73<br>(26.69 – 327.23)   | 49.81<br>(28.82 – 117.11)   |
| Fiji      | 16.55<br>(15.02 – 18.22) | 9.66<br>(8.62 – 10.77)   | 22.05<br>(19.96 – 24.56) | 7.83<br>(5.97 – 10.32) | 5.30<br>(4.01 – 7.21)   | 9.37<br>(6.84 – 12.62) | 254.88<br>(198.88 – 321.88) | 205.23<br>(158.32 – 268.68) | 292.81<br>(218.47 – 387.12) |
| Finland   | 10.27<br>(9.00 – 11.74)  | 9.42<br>(8.25 – 10.78)   | 11.07<br>(9.58 – 12.73)  | 3.35<br>(3.00 – 3.61)  | 3.33<br>(3.04 – 3.57)   | 3.33<br>(2.94 – 3.65)  | 110.60<br>(102.95 – 119.05) | 110.57<br>(102.31 – 119.66) | 109.92<br>(101.01 – 120.35) |
| France    | 6.48<br>(5.75 – 7.26)    | 6.29<br>(5.57 – 7.07)    | 6.68<br>(5.87 – 7.66)    | 2.09<br>(1.89 – 2.25)  | 2.22<br>(2.04 – 2.38)   | 1.98<br>(1.72 – 2.18)  | 66.55<br>(61.47 – 71.66)    | 69.99<br>(64.37 – 75.65)    | 63.21<br>(57.62 – 69.70)    |
| Gabon     | 5.96<br>(5.18 – 6.97)    | 6.65<br>(5.71 – 7.71)    | 5.41<br>(4.55 – 6.43)    | 1.95<br>(1.16 – 3.29)  | 2.37<br>(1.14 – 4.97)   | 1.61<br>(0.84 – 2.97)  | 64.90<br>(41.12 – 105.68)   | 77.18<br>(41.40 – 148.76)   | 53.74<br>(33.70 – 91.22)    |
| Gambia    | 5.27<br>(4.56 – 6.15)    | 6.00<br>(5.13 – 6.96)    | 4.62<br>(3.93 – 5.42)    | 3.05<br>(1.31 – 7.59)  | 3.29<br>(0.88 – 12.50)  | 2.80<br>(1.48 – 6.54)  | 105.25<br>(51.58 – 242.97)  | 119.66<br>(42.19 – 402.38)  | 91.09<br>(53.03 – 186.17)   |
| Georgia   | 16.12<br>(14.71 – 17.80) | 19.18<br>(17.22 – 21.32) | 13.29<br>(11.92 – 15.03) | 8.83<br>(7.26 – 10.49) | 11.02<br>(8.85 – 13.37) | 7.08<br>(5.83 – 8.37)  | 244.00<br>(201.68 – 286.44) | 319.30<br>(260.34 – 388.32) | 177.12<br>(146.67 – 206.65) |
| Germany   | 6.30<br>(5.42 – 7.26)    | 5.71<br>(4.97 – 6.57)    | 6.90<br>(5.85 – 8.08)    | 2.17<br>(1.94 – 2.34)  | 2.10<br>(1.91 – 2.28)   | 2.27<br>(1.98 – 2.48)  | 69.11<br>(64.47 – 74.57)    | 63.91<br>(59.08 – 68.84)    | 74.43<br>(68.18 – 80.98)    |
| Ghana     | 6.08<br>(5.21 – 7.10)    | 7.13<br>(6.11 – 8.21)    | 5.22<br>(4.38 – 6.16)    | 3.19<br>(1.70 – 6.19)  | 3.54<br>(1.28 – 10.25)  | 2.85<br>(1.73 – 5.55)  | 113.34<br>(64.95 – 211.59)  | 134.78<br>(57.36 – 341.66)  | 93.91<br>(62.08 – 168.83)   |
| Greece    | 7.20<br>(6.30 – 8.23)    | 6.79<br>(5.92 – 7.71)    | 7.59<br>(6.51 – 8.77)    | 2.86<br>(2.60 – 3.05)  | 3.06<br>(2.79 – 3.30)   | 2.69<br>(2.37 – 2.93)  | 86.72<br>(80.58 – 93.76)    | 93.60<br>(85.63 – 101.08)   | 80.30<br>(73.14 – 88.07)    |
| Greenland | 11.62<br>(10.55 – 12.93) | 10.39<br>(9.41 – 11.54)  | 13.29<br>(12.04 – 14.81) | 7.53<br>(5.65 – 9.37)  | 6.05<br>(3.30 – 8.20)   | 9.03<br>(7.11 – 11.59) | 231.20<br>(182.48 – 279.81) | 183.56<br>(113.00 – 239.09) | 284.02<br>(228.51 – 354.89) |

|               |                          |                          |                          |                         |                         |                         |                             |                             |                             |
|---------------|--------------------------|--------------------------|--------------------------|-------------------------|-------------------------|-------------------------|-----------------------------|-----------------------------|-----------------------------|
| Grenada       | 10.27<br>(9.19 – 11.49)  | 9.89<br>(8.85 – 11.05)   | 11.60<br>(10.34 – 13.22) | 4.67<br>(4.08 – 5.27)   | 4.76<br>(4.12 – 5.42)   | 4.82<br>(4.17 – 5.50)   | 146.31<br>(126.09 – 165.44) | 140.85<br>(120.74 – 159.74) | 154.24<br>(133.98 – 176.63) |
| Guam          | 10.11<br>(8.99 – 11.25)  | 9.94<br>(8.86 – 11.08)   | 10.13<br>(8.92 – 11.40)  | 2.95<br>(2.46 – 3.46)   | 3.04<br>(2.38 – 3.97)   | 2.80<br>(2.19 – 3.46)   | 136.77<br>(117.70 – 159.68) | 150.35<br>(122.41 – 186.29) | 121.31<br>(101.23 – 144.34) |
| Guatemala     | 8.94<br>(8.00 – 10.10)   | 8.21<br>(7.30 – 9.30)    | 9.58<br>(8.45 – 10.92)   | 2.53<br>(2.16 – 2.91)   | 2.53<br>(2.09 – 2.96)   | 2.53<br>(2.13 – 2.93)   | 93.75<br>(80.59 – 107.15)   | 92.76<br>(78.44 – 107.43)   | 94.36<br>(80.70 – 108.20)   |
| Guinea        | 6.05<br>(5.19 – 7.05)    | 7.19<br>(6.20 – 8.44)    | 4.99<br>(4.25 – 5.79)    | 3.04<br>(1.32 – 6.88)   | 3.21<br>(0.85 – 10.70)  | 2.90<br>(1.65 – 7.23)   | 107.15<br>(55.14 – 216.70)  | 119.50<br>(45.79 – 334.98)  | 96.41<br>(61.18 – 201.26)   |
| Guinea-Bissau | 5.68<br>(4.91 – 6.62)    | 6.59<br>(5.64 – 7.75)    | 4.92<br>(4.21 – 5.77)    | 4.41<br>(1.85 – 9.87)   | 4.89<br>(1.20 – 16.49)  | 3.98<br>(2.20 – 9.45)   | 151.44<br>(70.21 – 320.57)  | 175.81<br>(53.99 – 539.94)  | 129.49<br>(75.22 – 268.57)  |
| Guyana        | 11.29<br>(10.21 – 12.57) | 10.50<br>(9.44 – 11.70)  | 12.09<br>(10.81 – 13.76) | 5.51<br>(4.26 – 6.96)   | 6.05<br>(4.61 – 7.69)   | 5.03<br>(3.83 – 6.40)   | 191.24<br>(147.74 – 242.52) | 209.36<br>(161.29 – 266.13) | 174.22<br>(133.18 – 221.81) |
| Haiti         | 14.75<br>(13.08 – 16.88) | 13.03<br>(11.53 – 14.96) | 16.30<br>(14.32 – 18.64) | 12.78<br>(6.59 – 20.85) | 10.95<br>(4.42 – 22.25) | 14.45<br>(4.97 – 24.62) | 434.98<br>(237.15 – 658.46) | 352.07<br>(168.36 – 635.23) | 511.90<br>(180.91 – 806.50) |
| Honduras      | 12.35<br>(11.06 – 13.91) | 10.77<br>(9.56 – 12.22)  | 13.73<br>(12.17 – 15.66) | 11.86<br>(8.47 – 15.42) | 9.13<br>(5.67 – 13.37)  | 14.22<br>(9.44 – 19.38) | 340.96<br>(235.34 – 447.31) | 263.84<br>(167.08 – 390.44) | 407.97<br>(268.02 – 562.14) |
| Hungary       | 5.99<br>(5.33 – 6.64)    | 5.68<br>(5.03 – 6.37)    | 6.33<br>(5.61 – 7.12)    | 2.17<br>(1.84 – 2.50)   | 2.15<br>(1.84 – 2.46)   | 2.18<br>(1.84 – 2.55)   | 75.62<br>(65.06 – 86.61)    | 72.49<br>(63.06 – 82.50)    | 78.50<br>(66.46 – 91.25)    |
| Iceland       | 7.24<br>(6.34 – 8.32)    | 7.10<br>(6.17 – 8.22)    | 7.40<br>(6.37 – 8.58)    | 2.05<br>(1.76 – 2.27)   | 1.87<br>(1.64 – 2.10)   | 2.19<br>(1.85 – 2.46)   | 62.92<br>(56.80 – 69.61)    | 59.92<br>(53.82 – 66.50)    | 65.54<br>(58.33 – 73.23)    |
| India         | 7.70<br>(6.65 – 8.95)    | 8.25<br>(7.11 – 9.57)    | 7.19<br>(6.21 – 8.37)    | 3.95<br>(2.73 – 5.50)   | 4.55<br>(2.18 – 7.46)   | 3.42<br>(2.54 – 4.73)   | 125.93<br>(91.47 – 167.76)  | 142.61<br>(78.43 – 221.67)  | 109.71<br>(84.38 – 146.99)  |

|                            |                          |                          |                          |                        |                        |                        |                             |                             |                             |
|----------------------------|--------------------------|--------------------------|--------------------------|------------------------|------------------------|------------------------|-----------------------------|-----------------------------|-----------------------------|
| Indonesia                  | 10.94<br>(9.54 – 12.64)  | 10.66<br>(9.26 – 12.24)  | 11.26<br>(9.81 – 13.06)  | 6.53<br>(4.72 – 10.63) | 5.58<br>(3.03 – 10.30) | 7.27<br>(4.56 – 12.88) | 198.84<br>(154.02 – 287.20) | 182.64<br>(115.14 – 298.94) | 212.18<br>(142.83 – 317.26) |
| Iran (Islamic Republic of) | 4.76<br>(4.15 – 5.41)    | 4.54<br>(3.95 – 5.16)    | 4.98<br>(4.31 – 5.69)    | 1.40<br>(1.05 – 1.69)  | 1.30<br>(0.88 – 1.74)  | 1.50<br>(1.09 – 1.83)  | 40.90<br>(34.14 – 48.29)    | 39.05<br>(29.87 – 50.44)    | 42.79<br>(35.07 – 51.96)    |
| Iraq                       | 5.11<br>(4.47 – 5.76)    | 5.04<br>(4.43 – 5.68)    | 5.30<br>(4.58 – 6.06)    | 2.36<br>(1.69 – 3.07)  | 2.44<br>(1.60 – 3.38)  | 2.30<br>(1.58 – 3.21)  | 74.78<br>(56.72 – 97.71)    | 73.59<br>(52.78 – 99.14)    | 76.47<br>(56.60 – 101.96)   |
| Ireland                    | 7.53<br>(6.64 – 8.52)    | 6.51<br>(5.64 – 7.41)    | 8.49<br>(7.40 – 9.79)    | 2.68<br>(2.36 – 2.94)  | 2.57<br>(2.29 – 2.86)  | 2.76<br>(2.35 – 3.09)  | 74.87<br>(68.89 – 81.33)    | 71.17<br>(64.98 – 78.17)    | 78.06<br>(69.12 – 86.04)    |
| Israel                     | 5.65<br>(4.84 – 6.54)    | 5.49<br>(4.68 – 6.32)    | 5.83<br>(4.90 – 6.84)    | 1.33<br>(1.18 – 1.45)  | 1.71<br>(1.53 – 1.89)  | 1.02<br>(0.88 – 1.13)  | 41.16<br>(37.50 – 44.92)    | 48.03<br>(43.66 – 52.58)    | 35.16<br>(31.26 – 39.42)    |
| Italy                      | 4.84<br>(4.26 – 5.39)    | 4.48<br>(3.95 – 5.02)    | 5.20<br>(4.57 – 5.87)    | 1.87<br>(1.66 – 2.01)  | 1.94<br>(1.78 – 2.05)  | 1.83<br>(1.59 – 1.99)  | 52.22<br>(48.49 – 55.95)    | 51.57<br>(48.37 – 54.88)    | 53.00<br>(48.58 – 57.31)    |
| Jamaica                    | 11.67<br>(10.55 – 13.08) | 9.67<br>(8.57 – 11.00)   | 13.63<br>(12.09 – 15.49) | 4.75<br>(3.68 – 6.04)  | 4.23<br>(3.16 – 5.51)  | 5.25<br>(4.07 – 6.67)  | 149.99<br>(116.73 – 190.13) | 126.71<br>(97.23 – 166.70)  | 172.53<br>(133.38 – 218.04) |
| Japan                      | 15.83<br>(13.71 – 18.40) | 13.59<br>(11.68 – 15.77) | 17.76<br>(15.35 – 20.76) | 4.21<br>(3.76 – 4.49)  | 4.18<br>(3.99 – 4.35)  | 4.06<br>(3.42 – 4.45)  | 150.89<br>(138.85 – 162.62) | 156.53<br>(146.64 – 166.62) | 142.30<br>(127.94 – 156.17) |
| Jordan                     | 4.69<br>(4.03 – 5.37)    | 4.80<br>(4.16 – 5.55)    | 4.56<br>(3.81 – 5.33)    | 0.51<br>(0.36 – 0.65)  | 0.47<br>(0.29 – 0.68)  | 0.55<br>(0.37 – 0.74)  | 24.18<br>(19.26 – 29.41)    | 23.26<br>(17.12 – 30.18)    | 25.24<br>(19.93 – 32.09)    |
| Kazakhstan                 | 10.15<br>(9.12 – 11.28)  | 12.05<br>(10.73 – 13.66) | 8.64<br>(7.68 – 9.66)    | 6.46<br>(5.60 – 7.37)  | 7.46<br>(6.41 – 8.64)  | 5.65<br>(4.84 – 6.53)  | 169.52<br>(145.47 – 193.34) | 203.46<br>(172.66 – 236.42) | 141.10<br>(121.09 – 163.10) |
| Kenya                      | 6.46<br>(5.58 – 7.60)    | 7.81<br>(6.76 – 9.11)    | 5.34<br>(4.60 – 6.26)    | 2.07<br>(0.93 – 5.05)  | 2.70<br>(0.89 – 9.07)  | 1.60<br>(0.82 – 4.50)  | 68.12<br>(35.50 – 148.42)   | 84.38<br>(34.00 – 243.07)   | 53.90<br>(32.92 – 134.44)   |

|                                        |                          |                          |                          |                        |                         |                        |                             |                             |                             |
|----------------------------------------|--------------------------|--------------------------|--------------------------|------------------------|-------------------------|------------------------|-----------------------------|-----------------------------|-----------------------------|
| Kiribati                               | 22.01<br>(19.58 – 24.58) | 22.43<br>(19.14 – 26.07) | 20.95<br>(18.62 – 23.77) | 9.04<br>(6.61 – 13.07) | 11.66<br>(7.21 – 20.35) | 6.54<br>(4.67 – 8.91)  | 349.55<br>(258.11 – 479.78) | 485.74<br>(327.54 – 778.30) | 223.08<br>(168.27 – 288.73) |
| Kuwait                                 | 5.55<br>(4.76 – 6.31)    | 5.27<br>(4.57 – 5.98)    | 5.83<br>(4.99 – 6.69)    | 0.51<br>(0.42 – 0.61)  | 0.63<br>(0.51 – 0.78)   | 0.34<br>(0.29 – 0.40)  | 25.93<br>(21.96 – 30.34)    | 27.85<br>(23.38 – 32.96)    | 23.69<br>(19.34 – 28.70)    |
| Kyrgyzstan                             | 9.56<br>(8.55 – 10.68)   | 11.08<br>(9.85 – 12.55)  | 8.30<br>(7.40 – 9.35)    | 6.13<br>(5.19 – 7.21)  | 8.19<br>(6.90 – 9.75)   | 4.64<br>(3.87 – 5.56)  | 186.36<br>(156.23 – 220.95) | 242.92<br>(200.40 – 288.78) | 139.54<br>(116.59 – 166.50) |
| Lao People's<br>Democratic<br>Republic | 9.87<br>(8.74 – 11.12)   | 9.89<br>(8.77 – 11.26)   | 9.88<br>(8.69 – 11.20)   | 5.68<br>(4.03 – 8.68)  | 5.33<br>(2.87 – 9.88)   | 5.93<br>(3.58 – 10.07) | 183.57<br>(135.18 – 261.22) | 180.91<br>(110.08 – 293.35) | 184.74<br>(120.21 – 273.55) |
| Latvia                                 | 7.23<br>(6.39 – 8.05)    | 7.92<br>(6.98 – 8.86)    | 6.65<br>(5.80 – 7.58)    | 3.14<br>(2.75 – 3.56)  | 4.04<br>(3.44 – 4.67)   | 2.51<br>(2.19 – 2.86)  | 93.12<br>(81.10 – 106.48)   | 118.05<br>(100.67 – 137.63) | 72.22<br>(62.47 – 82.18)    |
| Lebanon                                | 5.55<br>(4.80 – 6.29)    | 5.09<br>(4.38 – 5.79)    | 6.00<br>(5.19 – 6.81)    | 2.06<br>(1.62 – 2.58)  | 2.36<br>(1.71 – 3.17)   | 1.79<br>(1.32 – 2.38)  | 61.49<br>(51.22 – 73.63)    | 67.07<br>(50.60 – 86.05)    | 56.37<br>(45.83 – 70.26)    |
| Lesotho                                | 6.46<br>(5.64 – 7.39)    | 6.89<br>(5.96 – 7.88)    | 6.28<br>(5.45 – 7.31)    | 3.49<br>(2.08 – 5.80)  | 4.44<br>(2.32 – 8.09)   | 2.86<br>(1.62 – 4.98)  | 106.98<br>(65.68 – 176.90)  | 135.16<br>(73.95 – 243.24)  | 85.57<br>(50.33 – 141.88)   |
| Liberia                                | 5.51<br>(4.73 – 6.47)    | 6.32<br>(5.35 – 7.50)    | 4.66<br>(4.01 – 5.48)    | 2.91<br>(0.97 – 9.10)  | 2.99<br>(0.47 – 14.83)  | 2.82<br>(1.40 – 8.63)  | 101.07<br>(41.10 – 284.17)  | 108.11<br>(27.86 – 449.31)  | 93.45<br>(51.21 – 235.23)   |
| Libya                                  | 5.09<br>(4.47 – 5.76)    | 4.73<br>(4.11 – 5.39)    | 5.48<br>(4.77 – 6.30)    | 2.15<br>(1.29 – 3.35)  | 1.71<br>(0.94 – 3.25)   | 2.61<br>(1.37 – 4.15)  | 79.74<br>(49.55 – 120.40)   | 65.15<br>(40.48 – 110.35)   | 94.98<br>(51.39 – 144.08)   |
| Lithuania                              | 6.75<br>(5.96 – 7.56)    | 7.02<br>(6.21 – 7.91)    | 6.51<br>(5.66 – 7.35)    | 3.03<br>(2.64 – 3.41)  | 3.79<br>(3.26 – 4.35)   | 2.47<br>(2.12 – 2.79)  | 91.73<br>(80.30 – 102.93)   | 113.05<br>(97.61 – 129.04)  | 73.66<br>(63.19 – 83.74)    |
| Luxembourg                             | 5.22<br>(4.50 – 6.00)    | 5.12<br>(4.43 – 5.88)    | 5.38<br>(4.57 – 6.24)    | 1.58<br>(1.41 – 1.76)  | 1.68<br>(1.48 – 1.89)   | 1.54<br>(1.35 – 1.73)  | 45.54<br>(41.35 – 50.45)    | 45.26<br>(40.70 – 50.39)    | 46.31<br>(41.65 – 51.55)    |



|                  |                          |                          |                          |                         |                         |                         |                             |                             |                             |
|------------------|--------------------------|--------------------------|--------------------------|-------------------------|-------------------------|-------------------------|-----------------------------|-----------------------------|-----------------------------|
| Madagascar       | 9.87<br>(8.43 – 11.47)   | 11.85<br>(10.15 – 13.86) | 8.04<br>(6.82 – 9.56)    | 5.37<br>(1.86 – 15.13)  | 6.89<br>(1.52 – 26.77)  | 4.02<br>(1.96 – 9.86)   | 182.17<br>(73.64 – 469.84)  | 231.59<br>(67.03 – 815.27)  | 136.05<br>(76.23 – 309.78)  |
| Malawi           | 6.95<br>(5.91 – 8.15)    | 8.63<br>(7.35 – 10.26)   | 5.58<br>(4.69 – 6.58)    | 3.51<br>(1.19 – 10.68)  | 4.62<br>(0.98 – 20.55)  | 2.62<br>(1.12 – 7.85)   | 114.81<br>(45.32 – 308.47)  | 150.65<br>(41.30 – 585.91)  | 83.34<br>(42.11 – 217.98)   |
| Malaysia         | 9.05<br>(8.05 – 10.12)   | 8.14<br>(7.22 – 9.19)    | 9.97<br>(8.79 – 11.20)   | 3.50<br>(2.67 – 4.28)   | 2.69<br>(1.66 – 3.65)   | 4.34<br>(3.18 – 5.70)   | 107.43<br>(84.91 – 127.31)  | 91.99<br>(64.86 – 120.29)   | 122.71<br>(96.03 – 150.78)  |
| Maldives         | 8.55<br>(7.54 – 9.73)    | 8.40<br>(7.33 – 9.68)    | 8.64<br>(7.57 – 9.80)    | 2.64<br>(2.05 – 3.31)   | 2.38<br>(1.68 – 3.29)   | 2.88<br>(2.19 – 3.73)   | 79.13<br>(63.73 – 97.86)    | 75.77<br>(57.92 – 103.89)   | 80.91<br>(64.85 – 101.62)   |
| Mali             | 5.19<br>(4.46 – 6.02)    | 6.18<br>(5.28 – 7.19)    | 4.18<br>(3.49 – 4.90)    | 2.48<br>(1.11 – 5.53)   | 2.28<br>(0.62 – 7.80)   | 2.70<br>(1.50 – 5.63)   | 87.74<br>(47.00 – 178.27)   | 84.54<br>(33.14 – 254.34)   | 91.18<br>(56.32 – 175.31)   |
| Malta            | 6.14<br>(5.27 – 7.10)    | 5.66<br>(4.86 – 6.52)    | 6.66<br>(5.66 – 7.77)    | 1.18<br>(1.05 – 1.32)   | 1.16<br>(1.04 – 1.31)   | 1.21<br>(1.06 – 1.36)   | 45.19<br>(40.40 – 50.63)    | 42.76<br>(38.27 – 48.23)    | 47.59<br>(41.66 – 53.81)    |
| Marshall Islands | 20.18<br>(18.03 – 22.51) | 18.41<br>(16.27 – 20.78) | 22.00<br>(19.52 – 24.75) | 12.31<br>(7.83 – 17.85) | 12.06<br>(6.26 – 20.18) | 12.64<br>(6.69 – 18.94) | 431.34<br>(286.73 – 619.46) | 469.86<br>(261.01 – 738.53) | 391.72<br>(222.68 – 578.96) |
| Mauritania       | 5.18<br>(4.40 – 6.09)    | 5.76<br>(4.92 – 6.81)    | 4.61<br>(3.88 – 5.46)    | 2.25<br>(0.98 – 5.16)   | 2.11<br>(0.58 – 8.13)   | 2.39<br>(1.31 – 5.47)   | 77.82<br>(39.96 – 164.89)   | 78.16<br>(30.11 – 256.56)   | 77.90<br>(47.34 – 159.35)   |
| Mauritius        | 10.76<br>(9.55 – 12.13)  | 10.37<br>(9.22 – 11.69)  | 11.16<br>(9.77 – 12.74)  | 5.72<br>(5.27 – 6.09)   | 6.14<br>(5.68 – 6.58)   | 5.23<br>(4.73 – 5.64)   | 187.30<br>(171.59 – 199.49) | 206.00<br>(188.34 – 221.29) | 167.21<br>(152.04 – 181.06) |
| Mexico           | 9.82<br>(8.60 – 11.24)   | 8.71<br>(7.62 – 9.99)    | 10.82<br>(9.43 – 12.48)  | 4.04<br>(3.59 – 4.49)   | 3.95<br>(3.32 – 4.63)   | 4.10<br>(3.48 – 4.69)   | 130.47<br>(117.11 – 144.99) | 132.76<br>(113.25 – 153.60) | 127.76<br>(110.88 – 146.31) |

|                                                      |                          |                          |                          |                         |                         |                         |                             |                             |                             |
|------------------------------------------------------|--------------------------|--------------------------|--------------------------|-------------------------|-------------------------|-------------------------|-----------------------------|-----------------------------|-----------------------------|
| Micronesia<br>(Federated<br>States of<br>Micronesia) | 19.75<br>(17.67 – 22.13) | 17.95<br>(15.79 – 20.37) | 20.80<br>(18.55 – 23.52) | 11.87<br>(7.68 – 16.99) | 11.59<br>(6.43 – 19.19) | 11.46<br>(6.72 – 17.37) | 406.22<br>(273.77 – 555.66) | 451.81<br>(278.93 – 702.69) | 349.75<br>(219.14 – 522.15) |
| Monaco                                               | 5.60<br>(4.82 – 6.42)    | 4.95<br>(4.21 – 5.73)    | 6.24<br>(5.33 – 7.17)    | 1.87<br>(1.34 – 2.55)   | 1.38<br>(0.85 – 1.91)   | 2.29<br>(1.51 – 3.28)   | 65.82<br>(49.14 – 88.01)    | 51.14<br>(35.04 – 68.92)    | 79.53<br>(55.75 – 112.94)   |
| Mongolia                                             | 13.01<br>(11.61 – 14.64) | 15.34<br>(13.61 – 17.37) | 11.34<br>(10.03 – 12.81) | 12.41<br>(9.07 – 16.05) | 14.54<br>(9.03 – 21.18) | 10.77<br>(7.81 – 14.27) | 312.23<br>(232.02 – 397.20) | 375.93<br>(240.63 – 544.06) | 259.56<br>(195.67 – 342.32) |
| Montenegro                                           | 5.23<br>(4.58 – 5.88)    | 5.26<br>(4.58 – 5.95)    | 5.28<br>(4.59 – 5.98)    | 2.15<br>(1.54 – 2.89)   | 1.74<br>(1.06 – 2.70)   | 2.46<br>(1.60 – 3.50)   | 61.62<br>(47.52 – 78.33)    | 51.25<br>(35.88 – 73.48)    | 70.46<br>(50.93 – 95.15)    |
| Morocco                                              | 6.87<br>(6.05 – 7.77)    | 6.71<br>(5.91 – 7.62)    | 7.07<br>(6.17 – 8.04)    | 3.43<br>(2.02 – 5.41)   | 2.96<br>(1.46 – 5.70)   | 3.89<br>(1.69 – 6.29)   | 97.77<br>(59.95 – 148.98)   | 78.97<br>(42.84 – 147.04)   | 116.54<br>(56.45 – 184.82)  |
| Mozambique                                           | 8.46<br>(7.27 – 10.10)   | 10.77<br>(9.26 – 12.77)  | 6.60<br>(5.59 – 7.94)    | 5.38<br>(1.75 – 15.43)  | 8.23<br>(1.91 – 31.61)  | 3.14<br>(1.33 – 8.51)   | 174.18<br>(64.61 – 475.93)  | 265.87<br>(75.07 – 928.51)  | 96.80<br>(48.49 – 240.55)   |
| Myanmar                                              | 9.48<br>(8.49 – 10.69)   | 10.46<br>(9.22 – 11.90)  | 8.69<br>(7.71 – 9.78)    | 5.89<br>(4.15 – 9.64)   | 6.83<br>(4.29 – 11.89)  | 5.08<br>(3.50 – 8.42)   | 191.83<br>(142.91 – 273.19) | 229.52<br>(154.05 – 354.83) | 158.06<br>(116.39 – 227.25) |
| Namibia                                              | 5.78<br>(5.05 – 6.68)    | 6.44<br>(5.59 – 7.52)    | 5.32<br>(4.56 – 6.19)    | 1.96<br>(1.33 – 3.12)   | 2.43<br>(1.51 – 4.36)   | 1.60<br>(1.03 – 2.89)   | 62.49<br>(43.55 – 94.93)    | 77.30<br>(49.83 – 134.34)   | 50.18<br>(34.69 – 86.16)    |
| Nauru                                                | 16.13<br>(14.37 – 17.95) | 14.84<br>(13.06 – 16.86) | 17.03<br>(15.13 – 19.22) | 12.87<br>(9.14 – 17.22) | 10.46<br>(6.15 – 15.60) | 14.56<br>(8.99 – 20.18) | 476.38<br>(352.58 – 635.27) | 438.93<br>(275.76 – 630.20) | 501.68<br>(343.10 – 687.54) |
| Nepal                                                | 8.88<br>(7.71 – 10.34)   | 9.08<br>(7.86 – 10.53)   | 8.73<br>(7.48 – 10.12)   | 4.57<br>(2.67 – 7.23)   | 5.20<br>(2.19 – 10.50)  | 4.03<br>(2.40 – 7.55)   | 139.47<br>(88.10 – 211.95)  | 157.91<br>(78 – 307.09)     | 123.50<br>(80.69 – 203.53)  |

|                          |                          |                          |                          |                       |                        |                        |                             |                             |                             |
|--------------------------|--------------------------|--------------------------|--------------------------|-----------------------|------------------------|------------------------|-----------------------------|-----------------------------|-----------------------------|
| Netherlands              | 6.53<br>(5.68 – 7.43)    | 5.59<br>(4.85 – 6.36)    | 7.48<br>(6.48 – 8.65)    | 2.27<br>(2.03 – 2.45) | 2.18<br>(1.98 – 2.38)  | 2.38<br>(2.08 – 2.60)  | 65.47<br>(60.53 – 70.34)    | 59.69<br>(55.13 – 64.83)    | 71.25<br>(65.24 – 77.90)    |
| New Zealand              | 5.81<br>(5.07 – 6.60)    | 4.87<br>(4.22 – 5.59)    | 6.70<br>(5.85 – 7.59)    | 2.97<br>(2.68 – 3.21) | 2.67<br>(2.47 – 2.88)  | 3.24<br>(2.86 – 3.55)  | 89.48<br>(82.69 – 95.65)    | 80.40<br>(74.82 – 86.36)    | 97.86<br>(89.34 – 105.74)   |
| Nicaragua                | 10.04<br>(8.78 – 11.51)  | 8.49<br>(7.45 – 9.84)    | 11.40<br>(9.86 – 13.11)  | 2.75<br>(2.15 – 3.37) | 2.31<br>(1.53 – 3.04)  | 3.11<br>(2.30 – 3.97)  | 96.00<br>(78.21 – 115.95)   | 81.50<br>(60.44 – 104.62)   | 108.10<br>(84.89 – 134.03)  |
| Niger                    | 5.83<br>(5.06 – 6.89)    | 6.68<br>(5.79 – 7.87)    | 5.03<br>(4.30 – 5.93)    | 2.95<br>(1.04 – 7.65) | 3.38<br>(0.62 – 11.92) | 2.54<br>(1.30 – 6.89)  | 94.89<br>(42.70 – 216.47)   | 109.40<br>(31.19 – 340.97)  | 81.32<br>(48.17 – 190.49)   |
| Nigeria                  | 4.46<br>(3.84 – 5.20)    | 4.87<br>(4.19 – 5.66)    | 4.10<br>(3.48 – 4.80)    | 1.55<br>(0.75 – 3.55) | 1.81<br>(0.52 – 6.24)  | 1.34<br>(0.78 – 2.86)  | 55.39<br>(31.94 – 111.94)   | 67.16<br>(27.75 – 194.27)   | 45.27<br>(30.43 – 82.54)    |
| Niue                     | 13.10<br>(11.65 – 14.70) | 11.63<br>(10.40 – 13.17) | 14.06<br>(12.40 – 15.89) | 7.37<br>(5.75 – 9.48) | 6.33<br>(4.67 – 9.08)  | 7.91<br>(5.85 – 10.28) | 298.12<br>(246.16 – 369.82) | 285.45<br>(219.81 – 381.29) | 305.83<br>(239.99 – 378.44) |
| North Macedonia          | 12.93<br>(11.83 – 14.06) | 11.36<br>(10.31 – 12.61) | 14.25<br>(12.91 – 15.65) | 7.79<br>(5.94 – 9.92) | 5.83<br>(4.01 – 7.96)  | 9.41<br>(6.74 – 12.39) | 211.45<br>(166.54 – 264.51) | 164.44<br>(117.31 – 216.35) | 255.34<br>(188.15 – 326.84) |
| Northern Mariana Islands | 12.95<br>(11.65 – 14.31) | 13.43<br>(11.87 – 15.12) | 12.26<br>(10.98 – 13.66) | 7.11<br>(5.75 – 8.91) | 5.73<br>(4.37 – 7.92)  | 8.15<br>(6.31 – 10.35) | 216.18<br>(175.42 – 265.97) | 214.39<br>(166.09 – 285.58) | 214.78<br>(172.58 – 272.85) |
| Norway                   | 6.91<br>(6.02 – 7.96)    | 6.38<br>(5.54 – 7.35)    | 7.46<br>(6.51 – 8.63)    | 2.20<br>(1.97 – 2.35) | 2.21<br>(2.03 – 2.35)  | 2.15<br>(1.90 – 2.34)  | 63.46<br>(58.36 – 68.61)    | 63.67<br>(58.62 – 68.60)    | 62.81<br>(57.33 – 68.72)    |
| Oman                     | 11.42<br>(10.19 – 12.71) | 10.43<br>(9.24 – 11.65)  | 12.75<br>(11.23 – 14.40) | 1.57<br>(1.06 – 2.09) | 1.72<br>(1.04 – 2.62)  | 1.50<br>(0.96 – 2.14)  | 52.11<br>(39.30 – 65.13)    | 50.38<br>(35.33 – 70.09)    | 55.97<br>(41.96 – 70.71)    |
| Pakistan                 | 10.37<br>(9.02 – 11.96)  | 10.28<br>(8.91 – 11.87)  | 10.50<br>(9.16 – 12.25)  | 5.34<br>(3.48 – 8.29) | 5.20<br>(2.54 – 9.96)  | 5.49<br>(3.27 – 8.78)  | 176.88<br>(123.25 – 257.80) | 174.86<br>(100.45 – 312.80) | 179.62<br>(112.51 – 271.14) |

|                     |                          |                          |                          |                        |                        |                         |                             |                             |                             |
|---------------------|--------------------------|--------------------------|--------------------------|------------------------|------------------------|-------------------------|-----------------------------|-----------------------------|-----------------------------|
| Palau               | 14.52<br>(12.97 – 16.19) | 13.46<br>(11.88 – 15.21) | 15.41<br>(13.82 – 17.29) | 6.59<br>(5.04 – 8.28)  | 5.88<br>(4.05 – 7.80)  | 7.28<br>(5.59 – 9.37)   | 245.55<br>(193.08 – 301.42) | 259.94<br>(185.76 – 336.96) | 216.79<br>(172.66 – 269.71) |
| Palestine           | 5.33<br>(4.62 – 6.03)    | 5.38<br>(4.65 – 6.12)    | 5.47<br>(4.74 – 6.23)    | 0.97<br>(0.74 – 1.17)  | 1.02<br>(0.69 – 1.32)  | 0.96<br>(0.71 – 1.23)   | 34.44<br>(28.83 – 40.46)    | 33.23<br>(25.70 – 41.96)    | 35.86<br>(29.47 – 43.77)    |
| Panama              | 11.81<br>(10.47 – 13.30) | 10.38<br>(9.09 – 11.82)  | 13.22<br>(11.50 – 15.00) | 4.97<br>(3.90 – 5.97)  | 4.99<br>(3.82 – 6.11)  | 4.97<br>(3.99 – 5.92)   | 153.87<br>(123.67 – 182.57) | 149.58<br>(116.60 – 180.71) | 158.15<br>(130.21 – 186.72) |
| Papua New<br>Guinea | 10.99<br>(9.77 – 12.28)  | 11.01<br>(9.73 – 12.61)  | 11.06<br>(9.73 – 12.42)  | 9.06<br>(5.89 – 13.58) | 7.46<br>(3.89 – 14.08) | 10.89<br>(6.62 – 16.44) | 290.54<br>(204.77 – 407.57) | 269.57<br>(159.62 – 462.09) | 316.46<br>(207.08 – 449.13) |
| Paraguay            | 10.88<br>(9.68 – 12.15)  | 9.40<br>(8.31 – 10.68)   | 12.30<br>(10.90 – 13.91) | 5.47<br>(4.10 – 7.14)  | 4.40<br>(2.92 – 6.24)  | 6.48<br>(4.59 – 8.69)   | 176.82<br>(136.33 – 228.17) | 143.20<br>(100.04 – 200.24) | 209.44<br>(155.35 – 278.30) |
| Peru                | 10.45<br>(9.31 – 11.74)  | 9.65<br>(8.51 – 10.85)   | 11.20<br>(9.87 – 12.78)  | 4.25<br>(3.04 – 5.70)  | 3.71<br>(2.40 – 5.11)  | 4.73<br>(3.22 – 6.45)   | 153.50<br>(113.79 – 197.66) | 141.94<br>(97.64 – 190.24)  | 163.92<br>(118.87 – 216.12) |
| Philippines         | 9.60<br>(8.37 – 11.03)   | 9.34<br>(8.11 – 10.69)   | 9.85<br>(8.56 – 11.42)   | 4.29<br>(3.54 – 5.18)  | 4.06<br>(2.99 – 5.70)  | 4.41<br>(3.38 – 5.56)   | 151.94<br>(125.29 – 178.28) | 150.71<br>(109.92 – 191.68) | 150.72<br>(119.16 – 183.66) |
| Poland              | 6.21<br>(5.40 – 7.09)    | 6.54<br>(5.65 – 7.48)    | 5.99<br>(5.17 – 6.86)    | 2.60<br>(2.37 – 2.84)  | 2.91<br>(2.59 – 3.22)  | 2.29<br>(2.01 – 2.56)   | 91.34<br>(83.49 – 99.86)    | 102.68<br>(92.05 – 113.39)  | 79.85<br>(71.17 – 89.29)    |
| Portugal            | 5.65<br>(4.84 – 6.43)    | 5.76<br>(5.01 – 6.59)    | 5.55<br>(4.56 – 6.39)    | 3.10<br>(2.80 – 3.35)  | 3.18<br>(2.92 – 3.43)  | 3.04<br>(2.65 – 3.33)   | 85.82<br>(79.96 – 92.53)    | 85.71<br>(79.21 – 92.15)    | 86.17<br>(78.77 – 93.45)    |
| Puerto Rico         | 7.83<br>(6.81 – 8.85)    | 6.42<br>(5.57 – 7.34)    | 9.12<br>(7.83 – 10.38)   | 1.97<br>(1.62 – 2.31)  | 1.90<br>(1.56 – 2.27)  | 2.01<br>(1.66 – 2.39)   | 66.93<br>(56.65 – 77.65)    | 64.28<br>(53.92 – 76.43)    | 68.77<br>(58.38 – 80.65)    |
| Qatar               | 7.80<br>(6.85 – 8.70)    | 6.62<br>(5.70 – 7.46)    | 9.91<br>(8.78 – 11.15)   | 3.22<br>(2.22 – 4.42)  | 3.91<br>(2.42 – 5.82)  | 2.47<br>(1.69 – 3.54)   | 82.29<br>(61.54 – 108.28)   | 91.40<br>(63.89 – 128.50)   | 69.42<br>(53.14 – 89.01)    |

|                                        |                          |                          |                          |                        |                        |                        |                             |                             |                             |
|----------------------------------------|--------------------------|--------------------------|--------------------------|------------------------|------------------------|------------------------|-----------------------------|-----------------------------|-----------------------------|
| Republic of<br>Korea                   | 10.63<br>(9.32 – 12.29)  | 8.74<br>(7.48 – 10.14)   | 12.18<br>(10.48 – 14.26) | 3.42<br>(2.79 – 4.02)  | 2.88<br>(2.08 – 3.53)  | 3.65<br>(2.83 – 4.43)  | 107.27<br>(93.63 – 123.56)  | 100.20<br>(79.99 – 121.38)  | 110.17<br>(93.61 – 130.11)  |
| Republic of<br>Moldova                 | 5.67<br>(4.91 – 6.39)    | 6.49<br>(5.64 – 7.39)    | 4.98<br>(4.21 – 5.69)    | 2.08<br>(1.86 – 2.34)  | 2.84<br>(2.46 – 3.28)  | 1.52<br>(1.34 – 1.73)  | 66.94<br>(59.78 – 75.43)    | 88.46<br>(76.54 – 101.66)   | 49.08<br>(43.66 – 55.41)    |
| Romania                                | 9.66<br>(8.82 – 10.44)   | 10.44<br>(9.50 – 11.45)  | 9.00<br>(8.19 – 9.91)    | 5.25<br>(4.54 – 5.93)  | 5.79<br>(4.89 – 6.72)  | 4.77<br>(4.11 – 5.40)  | 150.40<br>(128.51 – 169.85) | 166.77<br>(140.43 – 192.69) | 135.16<br>(116.08 – 153.01) |
| Russian<br>Federation                  | 10.12<br>(8.88 – 11.54)  | 11.78<br>(10.30 – 13.47) | 8.73<br>(7.66 – 9.98)    | 5.99<br>(5.51 – 6.44)  | 6.98<br>(6.26 – 7.67)  | 5.13<br>(4.57 – 5.64)  | 177.74<br>(164.71 – 191.72) | 215.37<br>(193.94 – 236.16) | 145.45<br>(130.03 – 160.39) |
| Rwanda                                 | 7.26<br>(6.28 – 8.56)    | 8.70<br>(7.45 – 10.30)   | 6.17<br>(5.24 – 7.17)    | 2.77<br>(1.01 – 7.37)  | 4.14<br>(1.04 – 14.03) | 1.85<br>(0.81 – 4.75)  | 88.92<br>(39.00 – 209.75)   | 123.89<br>(39.73 – 388.75)  | 61.91<br>(33.87 – 137.79)   |
| Saint Kitts and<br>Nevis               | 9.97<br>(8.90 – 11.15)   | 9.38<br>(8.40 – 10.53)   | 10.69<br>(9.49 – 12.21)  | 4.36<br>(3.66 – 5.09)  | 4.47<br>(3.82 – 5.20)  | 4.32<br>(3.58 – 5.13)  | 132.11<br>(111.94 – 156.24) | 134.60<br>(114.07 – 160.32) | 129.44<br>(107.68 – 155.14) |
| Saint Lucia                            | 9.61<br>(8.56 – 10.75)   | 8.07<br>(7.09 – 9.20)    | 11.12<br>(9.80 – 12.54)  | 3.69<br>(3.01 – 4.42)  | 3.20<br>(2.59 – 3.82)  | 4.15<br>(3.40 – 4.98)  | 118.66<br>(98.19 – 142.38)  | 102.08<br>(83.21 – 120.99)  | 134.33<br>(111.55 – 160.99) |
| Saint Vincent<br>and the<br>Grenadines | 8.31<br>(7.43 – 9.22)    | 7.23<br>(6.40 – 8.17)    | 9.48<br>(8.41 – 10.65)   | 3.22<br>(2.83 – 3.65)  | 3.07<br>(2.66 – 3.49)  | 3.43<br>(2.95 – 3.94)  | 109.86<br>(96.29 – 124.86)  | 97.78<br>(85.21 – 111.04)   | 122.77<br>(106.22 – 141.75) |
| Samoa                                  | 15.40<br>(13.78 – 17.40) | 13.18<br>(11.62 – 15.02) | 17.47<br>(15.54 – 19.86) | 8.10<br>(5.75 – 11.36) | 6.55<br>(3.95 – 10.87) | 9.29<br>(6.42 – 12.99) | 272.27<br>(197.64 – 370.52) | 258.39<br>(161.82 – 407.22) | 281.17<br>(204.30 – 383.12) |
| San Marino                             | 5.62<br>(4.80 – 6.60)    | 5.33<br>(4.49 – 6.21)    | 5.87<br>(5.00 – 6.90)    | 0.69<br>(0.42 – 1.02)  | 0.64<br>(0.36 – 1.00)  | 0.74<br>(0.44 – 1.13)  | 29.91<br>(21.78 – 40.14)    | 28.00<br>(19.82 – 39.04)    | 31.65<br>(22.99 – 42.61)    |

|                       |                          |                          |                          |                         |                         |                         |                             |                             |                             |
|-----------------------|--------------------------|--------------------------|--------------------------|-------------------------|-------------------------|-------------------------|-----------------------------|-----------------------------|-----------------------------|
| Sao Tome and Principe | 5.96<br>(5.10 – 7.02)    | 6.43<br>(5.50 – 7.65)    | 5.51<br>(4.69 – 6.48)    | 2.45<br>(1.12 – 6.00)   | 2.32<br>(0.54 – 9.54)   | 2.54<br>(1.50 – 5.80)   | 90.59<br>(45.45 – 211.51)   | 92.49<br>(29.53 – 336.27)   | 87.90<br>(55.65 – 181.20)   |
| Saudi Arabia          | 4.57<br>(3.96 – 5.17)    | 4.15<br>(3.55 – 4.80)    | 5.18<br>(4.47 – 5.88)    | 1.32<br>(0.90 – 1.75)   | 1.10<br>(0.59 – 1.57)   | 1.67<br>(1.08 – 2.57)   | 46.41<br>(33.48 – 59.46)    | 37.78<br>(22.02 – 52.08)    | 59.79<br>(42.13 – 83.88)    |
| Senegal               | 5.13<br>(4.38 – 6.04)    | 5.83<br>(4.98 – 6.89)    | 4.50<br>(3.77 – 5.32)    | 2.75<br>(1.27 – 6.29)   | 2.98<br>(0.78 – 10.41)  | 2.53<br>(1.51 – 5.93)   | 94.31<br>(48.54 – 200.08)   | 106.38<br>(37.33 – 328.27)  | 82.87<br>(52.87 – 172.20)   |
| Serbia                | 9.88<br>(9.04 – 10.69)   | 8.85<br>(7.98 – 9.73)    | 10.62<br>(9.69 – 11.63)  | 4.88<br>(3.87 – 6.08)   | 4.08<br>(2.90 – 5.48)   | 5.56<br>(4.28 – 7.28)   | 142.86<br>(115.43 – 173.60) | 119.38<br>(89.69 – 156.86)  | 164.37<br>(130.83 – 208.97) |
| Seychelles            | 7.19<br>(6.29 – 8.12)    | 6.92<br>(6.05 – 7.89)    | 7.48<br>(6.50 – 8.62)    | 1.98<br>(1.31 – 2.92)   | 1.75<br>(0.61 – 3.69)   | 2.07<br>(1.15 – 3.26)   | 73.17<br>(54.77 – 94.85)    | 68.53<br>(33.75 – 119.03)   | 75.84<br>(51.98 – 105.55)   |
| Sierra Leone          | 5.61<br>(4.80 – 6.56)    | 6.33<br>(5.47 – 7.44)    | 4.89<br>(4.10 – 5.78)    | 2.93<br>(1.21 – 8.14)   | 2.94<br>(0.63 – 12.81)  | 2.90<br>(1.52 – 7.45)   | 106.18<br>(52.39 – 262.54)  | 111.73<br>(36.45 – 404.08)  | 100.46<br>(57.27 – 223.35)  |
| Singapore             | 8.72<br>(7.40 – 10.29)   | 7.66<br>(6.40 – 9.14)    | 9.80<br>(8.19 – 11.80)   | 1.32<br>(1.19 – 1.44)   | 1.06<br>(0.96 – 1.16)   | 1.54<br>(1.34 – 1.72)   | 57.01<br>(49.88 – 63.87)    | 49.42<br>(43.22 – 55.59)    | 64.02<br>(55.44 – 72.89)    |
| Slovakia              | 5.59<br>(4.86 – 6.29)    | 5.68<br>(4.91 – 6.34)    | 5.60<br>(4.84 – 6.36)    | 2.15<br>(1.68 – 2.64)   | 2.08<br>(1.46 – 2.72)   | 2.18<br>(1.60 – 2.83)   | 73.18<br>(60.56 – 87.70)    | 70.33<br>(53.10 – 89.05)    | 75.45<br>(60.33 – 95.18)    |
| Slovenia              | 5.27<br>(4.53 – 5.98)    | 5.03<br>(4.32 – 5.72)    | 5.52<br>(4.75 – 6.32)    | 1.37<br>(1.15 – 1.57)   | 1.37<br>(1.16 – 1.58)   | 1.35<br>(1.13 – 1.57)   | 43.32<br>(37.01 – 49.25)    | 42.52<br>(35.72 – 48.93)    | 43.81<br>(36.80 – 51.20)    |
| Solomon Islands       | 24.22<br>(21.64 – 27.07) | 20.17<br>(17.96 – 23.17) | 28.30<br>(25.04 – 31.77) | 11.68<br>(7.44 – 16.89) | 10.56<br>(5.69 – 18.06) | 12.79<br>(7.61 – 20.74) | 359.24<br>(244.30 – 501.87) | 372.44<br>(222.97 – 580.18) | 345.78<br>(225.52 – 515.22) |
| Somalia               | 9.04<br>(7.74 – 10.81)   | 11.26<br>(9.59 – 13.31)  | 7.28<br>(6.08 – 8.70)    | 4.62<br>(0.79 – 16.89)  | 7.07<br>(0.49 – 32.98)  | 2.92<br>(0.77 – 13.89)  | 146.23<br>(36.19 – 474.18)  | 212.88<br>(29.99 – 880.64)  | 93.52<br>(34.77 – 357.19)   |

|                                  |                          |                          |                         |                       |                        |                       |                             |                             |                             |
|----------------------------------|--------------------------|--------------------------|-------------------------|-----------------------|------------------------|-----------------------|-----------------------------|-----------------------------|-----------------------------|
| South Africa                     | 4.63<br>(4.02 – 5.39)    | 4.72<br>(4.08 – 5.43)    | 4.59<br>(3.93 – 5.41)   | 1.46<br>(1.20 – 1.68) | 1.50<br>(0.97 – 1.93)  | 1.42<br>(1.12 – 1.68) | 49.67<br>(42.12 – 56.90)    | 50.78<br>(36.57 – 68.2)     | 48.39<br>(39.75 – 56.87)    |
| South Sudan                      | 6.82<br>(5.88 – 8.02)    | 8.14<br>(6.98 – 9.52)    | 5.48<br>(4.66 – 6.49)   | 3.14<br>(1.20 – 7.70) | 4.05<br>(1.08 – 12.58) | 2.17<br>(1.08 – 5.18) | 101.47<br>(47.05 – 219.37)  | 128.99<br>(45.19 – 350.22)  | 73.22<br>(43.57 – 154.30)   |
| Spain                            | 6.05<br>(5.27 – 6.89)    | 5.74<br>(4.98 – 6.51)    | 6.38<br>(5.48 – 7.37)   | 2.27<br>(2.02 – 2.47) | 2.56<br>(2.33 – 2.77)  | 2.09<br>(1.80 – 2.32) | 63.46<br>(58.71 – 68.10)    | 65.52<br>(60.26 – 70.58)    | 62.36<br>(56.69 – 68.22)    |
| Sri Lanka                        | 10.69<br>(9.44 – 12.00)  | 10.85<br>(9.60 – 12.20)  | 10.67<br>(9.27 – 12.07) | 2.01<br>(1.34 – 2.77) | 2.11<br>(1.26 – 3.06)  | 1.88<br>(1.21 – 2.76) | 69.07<br>(51.67 – 88.03)    | 71.68<br>(48.94 – 100.75)   | 66.02<br>(49.62 – 86.71)    |
| Sudan                            | 6.36<br>(5.62 – 7.19)    | 6.48<br>(5.73 – 7.40)    | 6.17<br>(5.38 – 7.04)   | 3.60<br>(1.84 – 6.50) | 3.34<br>(1.25 – 7.85)  | 3.90<br>(1.53 – 7.50) | 110.18<br>(59.09 – 182.69)  | 99.50<br>(44.03 – 205.39)   | 121.83<br>(53.62 – 213.02)  |
| Suriname                         | 10.29<br>(9.18 – 11.54)  | 9.55<br>(8.47 – 10.75)   | 11.02<br>(9.70 – 12.59) | 4.44<br>(3.31 – 5.75) | 4.46<br>(3.13 – 6.26)  | 4.44<br>(3.31 – 5.75) | 155.77<br>(122.99 – 195.04) | 152.92<br>(112.86 – 211.75) | 158.42<br>(122.95 – 198.42) |
| Sweden                           | 6.48<br>(5.59 – 7.44)    | 6.34<br>(5.45 – 7.26)    | 6.60<br>(5.67 – 7.65)   | 1.81<br>(1.58 – 2.04) | 1.57<br>(1.33 – 1.80)  | 2.01<br>(1.70 – 2.31) | 52.92<br>(47.30 – 58.72)    | 47.93<br>(41.15 – 55.15)    | 57.50<br>(49.92 – 64.87)    |
| Switzerland                      | 5.52<br>(4.73 – 6.42)    | 5.00<br>(4.20 – 5.81)    | 6.03<br>(5.18 – 7.03)   | 1.66<br>(1.43 – 1.84) | 1.67<br>(1.51 – 1.83)  | 1.67<br>(1.40 – 1.88) | 46.55<br>(42.15 – 51.03)    | 45.65<br>(41.94 – 49.83)    | 47.41<br>(41.95 – 52.61)    |
| Syrian Arab<br>Republic          | 6.73<br>(5.96 – 7.48)    | 6.88<br>(6.14 – 7.68)    | 6.57<br>(5.78 – 7.38)   | 2.35<br>(1.56 – 3.31) | 2.41<br>(1.47 – 3.86)  | 2.30<br>(1.50 – 3.17) | 75.11<br>(54.37 – 101.19)   | 77.21<br>(51.37 – 114.62)   | 73.57<br>(53.14 – 99.06)    |
| Taiwan<br>(Province of<br>China) | 8.94<br>(7.91 – 10.04)   | 8.65<br>(7.64 – 9.65)    | 9.22<br>(8.04 – 10.62)  | 2.30<br>(2.08 – 2.49) | 2.49<br>(2.27 – 2.70)  | 2.12<br>(1.84 – 2.33) | 80.11<br>(72.28 – 87.41)    | 84.28<br>(76.47 – 92.54)    | 75.77<br>(66.36 – 85.05)    |
| Tajikistan                       | 11.16<br>(10.03 – 12.44) | 12.67<br>(11.22 – 14.34) | 9.76<br>(8.65 – 10.99)  | 3.87<br>(2.75 – 5.14) | 3.89<br>(2.27 – 5.80)  | 3.85<br>(2.64 – 5.31) | 112.59<br>(83.54 – 147.39)  | 114.84<br>(69.73 – 172.18)  | 110.33<br>(79.62 – 150.05)  |

|                        |                          |                          |                          |                         |                         |                         |                             |                             |                             |
|------------------------|--------------------------|--------------------------|--------------------------|-------------------------|-------------------------|-------------------------|-----------------------------|-----------------------------|-----------------------------|
| Thailand               | 12.63<br>(11.30 – 14.29) | 14.06<br>(12.49 – 15.83) | 11.35<br>(10.03 – 13.00) | 8.18<br>(6.29 – 10.53)  | 9.65<br>(6.92 – 12.99)  | 6.77<br>(4.90 – 8.92)   | 237.39<br>(186.44 – 308.38) | 301.38<br>(225.96 – 407.24) | 177.34<br>(137.47 – 224.58) |
| Timor-Leste            | 9.39<br>(8.25 – 10.71)   | 9.20<br>(8.02 – 10.57)   | 9.59<br>(8.40 – 10.91)   | 6.35<br>(3.51 – 11.85)  | 5.89<br>(2.79 – 14.32)  | 6.78<br>(3.71 – 12.44)  | 193.12<br>(121.46 – 327.81) | 190.30<br>(106.41 – 401.69) | 195.32<br>(115.09 – 318.46) |
| Togo                   | 5.45<br>(4.69 – 6.37)    | 6.46<br>(5.56 – 7.55)    | 4.65<br>(3.95 – 5.46)    | 3.15<br>(1.34 – 8.02)   | 3.66<br>(0.85 – 14.59)  | 2.69<br>(1.42 – 7.00)   | 107.37<br>(50.83 – 256.83)  | 129.25<br>(39.95 – 446.37)  | 87.77<br>(50.91 – 202.87)   |
| Tokelau                | 13.55<br>(12.03 – 15.22) | 11.32<br>(9.97 – 12.95)  | 15.65<br>(13.95 – 17.75) | 7.97<br>(5.84 – 11.52)  | 6.52<br>(3.95 – 11.47)  | 9.27<br>(6.24 – 12.31)  | 320.05<br>(251 – 442.39)    | 282.92<br>(184.46 – 478.89) | 356.03<br>(255.77 – 446.32) |
| Tonga                  | 10.04<br>(8.90 – 11.32)  | 8.96<br>(7.86 – 10.17)   | 10.82<br>(9.55 – 12.30)  | 3.91<br>(2.68 – 5.69)   | 3.01<br>(1.89 – 5.39)   | 4.48<br>(3.04 – 6.71)   | 134.15<br>(97.09 – 189.50)  | 127.01<br>(84.68 – 209.83)  | 138.26<br>(101.32 – 189.46) |
| Trinidad and<br>Tobago | 9.79<br>(8.80 – 10.98)   | 8.95<br>(8.03 – 10.01)   | 10.65<br>(9.42 – 12.02)  | 4.95<br>(3.80 – 6.31)   | 5.12<br>(3.87 – 6.61)   | 4.78<br>(3.69 – 6.09)   | 169.90<br>(133.29 – 215.74) | 177.15<br>(136.21 – 227.13) | 162.27<br>(126.68 – 205.22) |
| Tunisia                | 6.05<br>(5.29 – 6.80)    | 5.96<br>(5.22 – 6.78)    | 6.19<br>(5.34 – 7.00)    | 2.14<br>(1.14 – 3.59)   | 2.13<br>(0.95 – 4.06)   | 2.16<br>(1.13 – 3.83)   | 60.86<br>(37.89 – 96.26)    | 57.71<br>(32.23 – 105.15)   | 64.00<br>(40.96 – 104.05)   |
| Turkey                 | 6.85<br>(6.05 – 7.63)    | 6.75<br>(5.93 – 7.59)    | 6.99<br>(6.13 – 7.92)    | 3.84<br>(2.98 – 4.78)   | 4.35<br>(3.13 – 5.87)   | 3.40<br>(2.54 – 4.49)   | 107.74<br>(86.97 – 132.16)  | 119.01<br>(89.38 – 156.37)  | 97.22<br>(76.69 – 122.74)   |
| Turkmenistan           | 12.15<br>(10.92 – 13.50) | 13.98<br>(12.44 – 15.76) | 10.36<br>(9.30 – 11.63)  | 8.38<br>(6.32 – 11.99)  | 11.05<br>(7.64 – 18.31) | 6.22<br>(3.82 – 8.58)   | 264.08<br>(202.57 – 363.86) | 343.56<br>(240.38 – 555.95) | 191.21<br>(121.22 – 261.37) |
| Tuvalu                 | 16.93<br>(15.06 – 19.00) | 15.47<br>(13.57 – 17.47) | 17.80<br>(15.88 – 20.43) | 10.45<br>(6.82 – 15.16) | 9.37<br>(5.26 – 16.67)  | 10.87<br>(6.55 – 15.90) | 358.85<br>(245.49 – 500.52) | 371.43<br>(225.47 – 607.89) | 333.14<br>(215.44 – 474.79) |
| Uganda                 | 6.79<br>(5.83 – 8.06)    | 8.34<br>(7.19 – 9.78)    | 5.56<br>(4.70 – 6.59)    | 2.33<br>(0.88 – 6.13)   | 3.61<br>(0.94 – 12.04)  | 1.39<br>(0.69 – 3.58)   | 78.61<br>(35.91 – 188.61)   | 114.97<br>(39.13 – 356.40)  | 48.72<br>(29.53 – 108.61)   |



|                                              |                          |                          |                          |                        |                        |                        |                             |                             |                             |
|----------------------------------------------|--------------------------|--------------------------|--------------------------|------------------------|------------------------|------------------------|-----------------------------|-----------------------------|-----------------------------|
| Ukraine                                      | 9.20<br>(8.07 – 10.49)   | 11.05<br>(9.64 – 12.64)  | 7.53<br>(6.56 – 8.68)    | 4.97<br>(3.78 – 6.28)  | 6.22<br>(4.30 – 8.38)  | 4.01<br>(2.72 – 5.64)  | 142.97<br>(107.72 – 179.64) | 185.21<br>(127.74 – 249.89) | 107.64<br>(74.14 – 148.03)  |
| United Arab Emirates                         | 5.73<br>(4.99 – 6.43)    | 5.30<br>(4.60 – 6.02)    | 6.95<br>(6.04 – 7.82)    | 3.69<br>(2.72 – 4.85)  | 2.25<br>(1.52 – 3.10)  | 9.77<br>(6.16 – 13.74) | 86.38<br>(67.94 – 109.03)   | 59.27<br>(44.77 – 78.14)    | 191.68<br>(135.01 – 259.80) |
| United Kingdom                               | 7.08<br>(6.24 – 8.10)    | 6.06<br>(5.31 – 6.91)    | 8.03<br>(7.05 – 9.21)    | 3.01<br>(2.76 – 3.14)  | 2.72<br>(2.56 – 2.81)  | 3.26<br>(2.94 – 3.44)  | 85.03<br>(80.48 – 89.34)    | 76.80<br>(73.13 – 80.13)    | 92.62<br>(87.19 – 98.04)    |
| United Republic of Tanzania                  | 6.92<br>(5.94 – 8.15)    | 8.02<br>(6.89 – 9.58)    | 5.95<br>(5.08 – 6.99)    | 2.24<br>(0.87 – 6.18)  | 2.83<br>(0.63 – 11.17) | 1.73<br>(0.83 – 4.00)  | 74.75<br>(35.77 – 182.11)   | 92.93<br>(31.09 – 320.61)   | 58.42<br>(33.93 – 119.78)   |
| United States of America                     | 6.30<br>(5.49 – 7.24)    | 5.59<br>(4.88 – 6.39)    | 7.04<br>(6.12 – 8.17)    | 3.24<br>(2.96 – 3.42)  | 3.06<br>(2.85 – 3.23)  | 3.40<br>(3.07 – 3.61)  | 100.36<br>(94.75 – 105.76)  | 91.75<br>(87.03 – 96.63)    | 108.18<br>(101.61 – 115.02) |
| United States Virgin Islands                 | 9.84<br>(8.78 – 11.05)   | 8.85<br>(7.84 – 9.94)    | 10.80<br>(9.46 – 12.37)  | 2.60<br>(1.96 – 3.39)  | 3.08<br>(2.19 – 4.20)  | 2.24<br>(1.59 – 3.19)  | 92.52<br>(69.94 – 120.09)   | 105.02<br>(73.50 – 140.13)  | 81.22<br>(59.40 – 112.73)   |
| Uruguay                                      | 13.40<br>(12.00 – 15.00) | 10.59<br>(9.45 – 12.02)  | 15.87<br>(13.89 – 17.96) | 6.68<br>(6.18 – 7.15)  | 5.97<br>(5.42 – 6.47)  | 7.21<br>(6.55 – 7.79)  | 210.03<br>(196.11 – 224.86) | 189.49<br>(172.98 – 205.32) | 226.72<br>(210.50 – 242.67) |
| Uzbekistan                                   | 6.87<br>(6.11 – 7.68)    | 7.75<br>(6.80 – 8.70)    | 6.02<br>(5.23 – 6.79)    | 4.51<br>(3.77 – 5.42)  | 5.96<br>(4.90 – 7.34)  | 3.36<br>(2.80 – 4.01)  | 121.28<br>(103.75 – 143.62) | 159.12<br>(134.29 – 193.57) | 88.70<br>(75.49 – 104.28)   |
| Vanuatu                                      | 17.11<br>(15.29 – 19.23) | 16.38<br>(14.39 – 18.61) | 17.72<br>(15.77 – 20.06) | 9.71<br>(5.90 – 14.23) | 9.67<br>(5.42 – 17.79) | 9.59<br>(4.18 – 14.90) | 346.50<br>(228.12 – 497.84) | 389.77<br>(241.97 – 644.17) | 302.20<br>(158.32 – 453.35) |
| Venezuela (Bolivarian Republic of Venezuela) | 12.35<br>(11.02 – 14.08) | 9.98<br>(8.75 – 11.37)   | 14.50<br>(12.77 – 16.71) | 5.51<br>(4.11 – 7.12)  | 4.84<br>(3.56 – 6.41)  | 6.10<br>(4.43 – 7.96)  | 184.51<br>(138.38 – 235.54) | 160.38<br>(120.46 – 210.85) | 206.21<br>(152.37 – 266.90) |

|          |                         |                          |                        |                        |                        |                        |                             |                             |                            |
|----------|-------------------------|--------------------------|------------------------|------------------------|------------------------|------------------------|-----------------------------|-----------------------------|----------------------------|
| Viet Nam | 10.49<br>(9.29 – 11.92) | 11.65<br>(10.20 – 13.24) | 9.58<br>(8.43 – 10.98) | 5.23<br>(2.92 – 9.86)  | 6.08<br>(2.92 – 12.27) | 4.39<br>(2.53 – 8.97)  | 151.17<br>(100.92 – 239.12) | 183.31<br>(103.64 – 320.19) | 119.79<br>(84.93 – 201.46) |
| Yemen    | 7.67<br>(6.81 – 8.73)   | 7.70<br>(6.82 – 8.77)    | 7.68<br>(6.71 – 8.78)  | 5.53<br>(2.54 – 10.61) | 6.12<br>(2.06 – 14.50) | 5.02<br>(2.16 – 11.01) | 150.97<br>(78.71 – 267.26)  | 157.83<br>(62.83 – 332.98)  | 144.87<br>(67.46 – 287.79) |
| Zambia   | 7.70<br>(6.65 – 8.97)   | 9.43<br>(8.19 – 11.01)   | 6.12<br>(5.21 – 7.25)  | 3.63<br>(1.65 – 7.67)  | 4.59<br>(1.55 – 12.96) | 2.80<br>(1.47 – 6.44)  | 113.69<br>(56.80 – 225.18)  | 140.65<br>(55.80 – 364.63)  | 88.16<br>(52.38 – 192.61)  |
| Zimbabwe | 8.46<br>(7.44 – 9.72)   | 9.59<br>(8.42 – 10.93)   | 7.54<br>(6.55 – 8.81)  | 6.01<br>(4.00 – 9.61)  | 6.99<br>(4.25 – 12.35) | 5.24<br>(3.17 – 8.54)  | 184.88<br>(127.85 – 282.71) | 221.30<br>(141.41 – 380.50) | 154.61<br>(98.78 – 241.55) |

---

*ASIR* age-standardized incidence rate, *ASMR* age-standardized mortality rate, *ASDR* age-standardized disability-adjusted life-year rate, *UI* uncertainty interval

**Table S8** EAPC of ASIR, ASMR, and ASDR for subarachnoid hemorrhage (SAH) in 204 countries and territories from 1990 to 2021

| Location            | EAPC of ASIR (95% CI)     |                           |                           | EAPC of ASMR (95% CI)     |                           |                           | EAPC of ASDR (95% CI)     |                           |                           |
|---------------------|---------------------------|---------------------------|---------------------------|---------------------------|---------------------------|---------------------------|---------------------------|---------------------------|---------------------------|
|                     | Both                      | Male                      | Female                    | Both                      | Male                      | Female                    | Both                      | Male                      | Female                    |
| Afghanistan         | -0.96<br>(-1.14 to -0.79) | -0.85<br>(-1.01 to -0.70) | -0.93<br>(-1.11 to -0.75) | -1.60<br>(-1.85 to -1.36) | -1.86<br>(-2.16 to -1.57) | -0.92<br>(-1.09 to -0.75) | -1.59<br>(-1.80 to -1.37) | -1.80<br>(-2.07 to -1.53) | -1.14<br>(-1.29 to -0.98) |
| Albania             | -0.24<br>(-0.31 to -0.17) | -0.39<br>(-0.46 to -0.31) | -0.19<br>(-0.27 to -0.12) | -1.27<br>(-1.51 to -1.02) | -2.28<br>(-2.48 to -2.09) | -0.63<br>(-0.92 to -0.34) | -1.54<br>(-1.74 to -1.33) | -2.11<br>(-2.30 to -1.92) | -1.09<br>(-1.32 to -0.86) |
| Algeria             | -1.65<br>(-1.76 to -1.54) | -1.65<br>(-1.77 to -1.53) | -1.62<br>(-1.74 to -1.50) | -1.65<br>(-1.73 to -1.56) | -2.19<br>(-2.23 to -2.16) | -0.95<br>(-1.13 to -0.77) | -2.11<br>(-2.14 to -2.07) | -2.45<br>(-2.50 to -2.40) | -1.75<br>(-1.82 to -1.68) |
| American Samoa      | -0.38<br>(-0.41 to -0.35) | -0.64<br>(-0.69 to -0.59) | -0.14<br>(-0.16 to -0.11) | -0.52<br>(-0.63 to -0.41) | -0.67<br>(-0.74 to -0.61) | -0.34<br>(-0.49 to -0.18) | -0.44<br>(-0.52 to -0.36) | -0.64<br>(-0.71 to -0.57) | -0.20<br>(-0.35 to -0.05) |
| Andorra             | -0.52<br>(-0.58 to -0.46) | -0.62<br>(-0.68 to -0.56) | -0.49<br>(-0.56 to -0.42) | -1.71<br>(-1.88 to -1.53) | -2.05<br>(-2.27 to -1.82) | -1.64<br>(-1.80 to -1.48) | -1.99<br>(-2.13 to -1.84) | -2.15<br>(-2.29 to -2.00) | -1.98<br>(-2.11 to -1.84) |
| Angola              | -0.84<br>(-0.91 to -0.77) | -0.82<br>(-0.89 to -0.75) | -0.80<br>(-0.88 to -0.72) | -1.36<br>(-1.47 to -1.26) | -1.42<br>(-1.52 to -1.33) | -1.14<br>(-1.27 to -1.01) | -1.34<br>(-1.43 to -1.25) | -1.34<br>(-1.42 to -1.26) | -1.22<br>(-1.34 to -1.10) |
| Antigua and Barbuda | -0.74<br>(-0.81 to -0.67) | -0.77<br>(-0.84 to -0.71) | -0.69<br>(-0.77 to -0.61) | -1.61<br>(-1.84 to -1.38) | -1.81<br>(-2.13 to -1.50) | -1.34<br>(-1.57 to -1.12) | -1.75<br>(-1.94 to -1.56) | -2.09<br>(-2.33 to -1.86) | -1.39<br>(-1.59 to -1.20) |
| Argentina           | -1.85<br>(-2.00 to -1.71) | -1.73<br>(-1.89 to -1.58) | -1.92<br>(-2.06 to -1.78) | -3.20<br>(-3.55 to -2.85) | -3.32<br>(-3.76 to -2.89) | -3.05<br>(-3.35 to -2.75) | -3.29<br>(-3.57 to -3.01) | -3.50<br>(-3.84 to -3.16) | -3.09<br>(-3.32 to -2.85) |
| Armenia             | -1.30<br>(-1.44 to -1.17) | -1.00<br>(-1.11 to -0.89) | -1.60<br>(-1.75 to -1.44) | -2.03<br>(-2.53 to -1.53) | -1.62<br>(-2.10 to -1.13) | -2.49<br>(-3.01 to -1.98) | -1.86<br>(-2.28 to -1.44) | -1.40<br>(-1.85 to -0.95) | -2.42<br>(-2.82 to -2.02) |

|            |                           |                           |                           |                           |                           |                           |                           |                           |                           |
|------------|---------------------------|---------------------------|---------------------------|---------------------------|---------------------------|---------------------------|---------------------------|---------------------------|---------------------------|
| Australia  | -0.63<br>(-0.71 to -0.55) | -0.46<br>(-0.54 to -0.37) | -0.73<br>(-0.80 to -0.65) | -1.86<br>(-1.97 to -1.75) | -1.37<br>(-1.55 to -1.19) | -2.15<br>(-2.25 to -2.05) | -2.05<br>(-2.14 to -1.97) | -1.85<br>(-2.00 to -1.71) | -2.17<br>(-2.25 to -2.09) |
| Austria    | -0.76<br>(-0.98 to -0.54) | -0.82<br>(-1.02 to -0.63) | -0.69<br>(-0.93 to -0.45) | -1.36<br>(-1.50 to -1.22) | -0.93<br>(-1.07 to -0.80) | -1.56<br>(-1.73 to -1.39) | -1.72<br>(-1.86 to -1.58) | -1.55<br>(-1.68 to -1.42) | -1.80<br>(-1.95 to -1.64) |
| Azerbaijan | -0.65<br>(-0.77 to -0.53) | -0.86<br>(-0.99 to -0.73) | -0.49<br>(-0.60 to -0.38) | -1.39<br>(-1.72 to -1.05) | -2.08<br>(-2.46 to -1.70) | -0.87<br>(-1.16 to -0.57) | -1.67<br>(-1.95 to -1.40) | -2.13<br>(-2.46 to -1.81) | -1.25<br>(-1.48 to -1.03) |
| Bahamas    | -0.37<br>(-0.42 to -0.31) | -0.22<br>(-0.26 to -0.18) | -0.48<br>(-0.54 to -0.41) | -0.90<br>(-1.03 to -0.76) | -0.89<br>(-1.08 to -0.70) | -0.92<br>(-1.05 to -0.80) | -0.91<br>(-1.02 to -0.79) | -0.83<br>(-0.98 to -0.67) | -0.98<br>(-1.10 to -0.87) |
| Bahrain    | -1.41<br>(-1.51 to -1.30) | -1.38<br>(-1.49 to -1.28) | -1.48<br>(-1.59 to -1.36) | -3.66<br>(-3.93 to -3.38) | -3.53<br>(-3.82 to -3.24) | -3.82<br>(-4.10 to -3.55) | -3.58<br>(-3.78 to -3.37) | -3.40<br>(-3.61 to -3.19) | -3.74<br>(-3.97 to -3.51) |
| Bangladesh | -0.49<br>(-0.57 to -0.42) | -0.36<br>(-0.43 to -0.29) | -0.50<br>(-0.59 to -0.42) | -1.74<br>(-2 to -1.47)    | -1.96<br>(-2.27 to -1.65) | -1.14<br>(-1.33 to -0.96) | -1.81<br>(-1.97 to -1.65) | -1.94<br>(-2.14 to -1.75) | -1.30<br>(-1.41 to -1.19) |
| Barbados   | -0.55<br>(-0.66 to -0.44) | -0.61<br>(-0.72 to -0.51) | -0.51<br>(-0.62 to -0.39) | -0.74<br>(-0.91 to -0.57) | -1.07<br>(-1.25 to -0.89) | -0.43<br>(-0.63 to -0.23) | -0.87<br>(-1.00 to -0.74) | -1.15<br>(-1.29 to -1.01) | -0.61<br>(-0.77 to -0.44) |
| Belarus    | -0.46<br>(-0.52 to -0.39) | -0.26<br>(-0.31 to -0.20) | -0.63<br>(-0.70 to -0.56) | -0.59<br>(-0.80 to -0.39) | -0.04<br>(-0.15 to 0.07)  | -1.17<br>(-1.45 to -0.88) | -0.68<br>(-0.89 to -0.48) | -0.17<br>(-0.32 to -0.02) | -1.29<br>(-1.55 to -1.02) |
| Belgium    | -0.67<br>(-0.91 to -0.43) | -0.53<br>(-0.77 to -0.29) | -0.74<br>(-0.98 to -0.51) | -0.40<br>(-0.79 to -0.01) | 0.27<br>(-0.16 to 0.70)   | -0.78<br>(-1.17 to -0.39) | -1.05<br>(-1.36 to -0.73) | -0.75<br>(-1.06 to -0.43) | -1.21<br>(-1.54 to -0.88) |
| Belize     | -0.60<br>(-0.66 to -0.53) | -0.49<br>(-0.55 to -0.42) | -0.73<br>(-0.80 to -0.65) | -1.38<br>(-1.60 to -1.15) | -1.67<br>(-1.92 to -1.42) | -1.13<br>(-1.40 to -0.86) | -1.48<br>(-1.66 to -1.30) | -1.67<br>(-1.88 to -1.47) | -1.33<br>(-1.55 to -1.10) |
| Benin      | -0.62<br>(-0.68 to -0.57) | -0.62<br>(-0.68 to -0.56) | -0.60<br>(-0.65 to -0.55) | -0.92<br>(-1.02 to -0.83) | -1.00<br>(-1.10 to -0.90) | -0.90<br>(-1.00 to -0.80) | -0.86<br>(-0.95 to -0.76) | -0.90<br>(-1.01 to -0.80) | -0.85<br>(-0.95 to -0.75) |

|                                                |                           |                           |                           |                           |                           |                           |                           |                           |                           |
|------------------------------------------------|---------------------------|---------------------------|---------------------------|---------------------------|---------------------------|---------------------------|---------------------------|---------------------------|---------------------------|
| Bermuda                                        | -1.07<br>(-1.16 to -0.99) | -0.81<br>(-0.87 to -0.76) | -1.26<br>(-1.37 to -1.15) | -2.46<br>(-2.64 to -2.28) | -1.81<br>(-2 to -1.63)    | -3.43<br>(-3.71 to -3.16) | -2.38<br>(-2.55 to -2.22) | -1.93<br>(-2.12 to -1.74) | -3.00<br>(-3.22 to -2.78) |
| Bhutan                                         | -1.32<br>(-1.41 to -1.22) | -1.26<br>(-1.34 to -1.17) | -1.43<br>(-1.54 to -1.32) | -1.91<br>(-1.97 to -1.85) | -1.92<br>(-1.96 to -1.89) | -1.97<br>(-2.08 to -1.85) | -1.99<br>(-2.05 to -1.94) | -1.90<br>(-1.93 to -1.87) | -2.13<br>(-2.24 to -2.01) |
| Bolivia<br>(Plurinational<br>State of Bolivia) | -1.27<br>(-1.36 to -1.19) | -1.27<br>(-1.36 to -1.19) | -1.27<br>(-1.35 to -1.18) | -1.61<br>(-1.67 to -1.55) | -1.91<br>(-1.97 to -1.85) | -1.44<br>(-1.52 to -1.36) | -1.99<br>(-2.08 to -1.91) | -2.19<br>(-2.29 to -2.09) | -1.87<br>(-1.95 to -1.78) |
| Bosnia and<br>Herzegovina                      | -1.09<br>(-1.15 to -1.02) | -1.12<br>(-1.19 to -1.05) | -1.07<br>(-1.13 to -1.02) | -3.20<br>(-3.47 to -2.94) | -3.34<br>(-3.61 to -3.07) | -3.11<br>(-3.37 to -2.86) | -3.19<br>(-3.42 to -2.95) | -3.30<br>(-3.55 to -3.04) | -3.08<br>(-3.31 to -2.86) |
| Botswana                                       | -0.60<br>(-0.68 to -0.52) | -0.78<br>(-0.92 to -0.64) | -0.40<br>(-0.42 to -0.37) | -2.11<br>(-2.31 to -1.91) | -2.73<br>(-3.09 to -2.37) | -1.33<br>(-1.83 to -0.83) | -1.85<br>(-2.02 to -1.68) | -2.47<br>(-2.79 to -2.14) | -1.04<br>(-1.49 to -0.60) |
| Brazil                                         | -1.38<br>(-1.53 to -1.24) | -1.27<br>(-1.39 to -1.16) | -1.47<br>(-1.64 to -1.30) | -1.07<br>(-1.28 to -0.86) | -1.03<br>(-1.19 to -0.87) | -1.10<br>(-1.34 to -0.86) | -1.66<br>(-1.84 to -1.48) | -1.71<br>(-1.84 to -1.58) | -1.64<br>(-1.85 to -1.43) |
| Brunei<br>Darussalam                           | -1.63<br>(-1.79 to -1.46) | -1.47<br>(-1.64 to -1.29) | -1.84<br>(-2 to -1.68)    | -2.26<br>(-2.48 to -2.04) | -1.76<br>(-2.05 to -1.46) | -2.65<br>(-2.83 to -2.47) | -2.24<br>(-2.47 to -2.01) | -1.86<br>(-2.13 to -1.59) | -2.61<br>(-2.82 to -2.40) |
| Bulgaria                                       | 0.12<br>(0.08 to 0.15)    | 0<br>(0.03 to 0.03)       | -0.26<br>(0.23 to 0.29)   | 0.58<br>(0.40 to 0.76)    | 0.55<br>(0.35 to 0.76)    | 0.64<br>(0.43 to 0.84)    | -0.10<br>(-0.25 to 0.05)  | -0.13<br>(-0.30 to 0.03)  | -0.05<br>(-0.25 to 0.15)  |
| Burkina Faso                                   | -0.44<br>(-0.48 to -0.39) | -0.40<br>(-0.45 to -0.35) | -0.48<br>(-0.52 to -0.43) | -0.28<br>(-0.36 to -0.21) | -0.45<br>(-0.54 to -0.36) | 0.02<br>(-0.11 to 0.15)   | -0.33<br>(-0.40 to -0.26) | -0.38<br>(-0.48 to -0.29) | -0.26<br>(-0.33 to -0.20) |
| Burundi                                        | -0.81<br>(-0.89 to -0.73) | -0.66<br>(-0.72 to -0.60) | -1.12<br>(-1.23 to -1.01) | -2.16<br>(-2.39 to -1.92) | -2.18<br>(-2.44 to -1.93) | -2.47<br>(-2.68 to -2.26) | -2.18<br>(-2.41 to -1.96) | -2.23<br>(-2.49 to -1.97) | -2.43<br>(-2.62 to -2.24) |

|                             |                           |                           |                           |                           |                           |                           |                           |                           |                           |
|-----------------------------|---------------------------|---------------------------|---------------------------|---------------------------|---------------------------|---------------------------|---------------------------|---------------------------|---------------------------|
| Côte d'Ivoire               | -0.57<br>(-0.63 to -0.52) | -0.67<br>(-0.75 to -0.59) | -0.43<br>(-0.47 to -0.39) | -0.56<br>(-0.74 to -0.37) | -0.99<br>(-1.24 to -0.74) | 0.16<br>(-0.04 to 0.37)   | -0.54<br>(-0.72 to -0.36) | -0.91<br>(-1.15 to -0.68) | 0.14<br>(-0.05 to 0.32)   |
| Cabo Verde                  | -0.57<br>(-0.64 to -0.51) | -0.69<br>(-0.75 to -0.62) | -0.48<br>(-0.54 to -0.42) | -1.04<br>(-1.17 to -0.90) | -1.42<br>(-1.61 to -1.23) | -0.93<br>(-1.07 to -0.79) | -1.19<br>(-1.25 to -1.13) | -1.46<br>(-1.56 to -1.37) | -1.20<br>(-1.26 to -1.14) |
| Cambodia                    | -0.79<br>(-0.84 to -0.73) | -0.88<br>(-0.94 to -0.82) | -0.72<br>(-0.78 to -0.66) | -1.83<br>(-1.94 to -1.71) | -1.87<br>(-1.94 to -1.79) | -1.86<br>(-2.00 to -1.71) | -1.98<br>(-2.08 to -1.87) | -1.93<br>(-2.01 to -1.86) | -2.05<br>(-2.18 to -1.92) |
| Cameroon                    | -0.34<br>(-0.41 to -0.27) | -0.22<br>(-0.30 to -0.13) | -0.48<br>(-0.54 to -0.42) | -0.52<br>(-0.76 to -0.28) | -0.64<br>(-0.90 to -0.38) | -0.37<br>(-0.58 to -0.16) | -0.38<br>(-0.65 to -0.12) | -0.46<br>(-0.74 to -0.18) | -0.29<br>(-0.52 to -0.06) |
| Canada                      | -1.02<br>(-1.08 to -0.96) | -0.67<br>(-0.70 to -0.63) | -1.21<br>(-1.28 to -1.14) | -1.76<br>(-1.89 to -1.63) | -1.18<br>(-1.35 to -1.01) | -2.12<br>(-2.26 to -1.97) | -1.99<br>(-2.12 to -1.87) | -1.58<br>(-1.70 to -1.45) | -2.27<br>(-2.42 to -2.12) |
| Central African<br>Republic | -0.15<br>(-0.16 to -0.13) | -0.07<br>(-0.08 to -0.05) | -0.22<br>(-0.24 to -0.19) | -0.42<br>(-0.46 to -0.38) | -0.36<br>(-0.41 to -0.31) | -0.48<br>(-0.55 to -0.40) | -0.48<br>(-0.53 to -0.44) | -0.41<br>(-0.46 to -0.37) | -0.60<br>(-0.67 to -0.52) |
| Chad                        | -0.32<br>(-0.38 to -0.25) | -0.36<br>(-0.43 to -0.29) | -0.34<br>(-0.39 to -0.29) | -0.01<br>(-0.21 to 0.19)  | -0.27<br>(-0.53 to -0.01) | 0.24<br>(0.12 to 0.36)    | -0.01<br>(-0.21 to 0.19)  | -0.20<br>(-0.45 to 0.06)  | 0.18<br>(0.06 to 0.30)    |
| Chile                       | -0.37<br>(-0.49 to -0.26) | -0.24<br>(-0.31 to -0.17) | -0.44<br>(-0.58 to -0.31) | -0.64<br>(-0.98 to -0.30) | -0.21<br>(-0.55 to 0.14)  | -0.94<br>(-1.28 to -0.60) | -1.10<br>(-1.37 to -0.82) | -0.81<br>(-1.10 to -0.51) | -1.31<br>(-1.57 to -1.04) |
| China                       | -3.70<br>(-4.08 to -3.31) | -3.72<br>(-4.15 to -3.28) | -3.70<br>(-4.04 to -3.37) | -6.66<br>(-7.32 to -6.01) | -6.08<br>(-6.63 to -5.53) | -7.27<br>(-8.02 to -6.51) | -6.29<br>(-6.89 to -5.69) | -5.81<br>(-6.34 to -5.28) | -6.84<br>(-7.52 to -6.16) |
| Colombia                    | -0.42<br>(-0.50 to -0.34) | -0.33<br>(-0.41 to -0.24) | -0.53<br>(-0.61 to -0.46) | -0.21<br>(-0.49 to 0.08)  | -0.04<br>(-0.33 to 0.26)  | -0.39<br>(-0.67 to -0.10) | -0.67<br>(-0.87 to -0.48) | -0.46<br>(-0.67 to -0.25) | -0.88<br>(-1.07 to -0.68) |
| Comoros                     | -0.81<br>(-0.88 to -0.74) | -0.76<br>(-0.83 to -0.69) | -0.87<br>(-0.94 to -0.80) | -1.71<br>(-1.97 to -1.46) | -1.73<br>(-2 to -1.46)    | -1.67<br>(-1.89 to -1.45) | -1.70<br>(-1.97 to -1.43) | -1.72<br>(-2.02 to -1.42) | -1.66<br>(-1.90 to -1.43) |

|                                                |                           |                           |                           |                           |                           |                           |                           |                           |                           |
|------------------------------------------------|---------------------------|---------------------------|---------------------------|---------------------------|---------------------------|---------------------------|---------------------------|---------------------------|---------------------------|
| Congo                                          | -0.90<br>(-0.98 to -0.82) | -1.12<br>(-1.21 to -1.02) | -0.68<br>(-0.75 to -0.62) | -1.45<br>(-1.59 to -1.32) | -1.98<br>(-2.14 to -1.82) | -0.96<br>(-1.14 to -0.79) | -1.43<br>(-1.58 to -1.29) | -1.95<br>(-2.11 to -1.78) | -0.92<br>(-1.10 to -0.74) |
| Cook Islands                                   | -1.37<br>(-1.50 to -1.23) | -1.08<br>(-1.20 to -0.95) | -1.64<br>(-1.78 to -1.49) | -3.49<br>(-3.72 to -3.27) | -3.15<br>(-3.35 to -2.95) | -3.77<br>(-4.02 to -3.52) | -3.05<br>(-3.25 to -2.85) | -2.66<br>(-2.85 to -2.47) | -3.42<br>(-3.64 to -3.20) |
| Costa Rica                                     | -0.68<br>(-0.75 to -0.61) | -0.32<br>(-0.37 to -0.27) | -0.96<br>(-1.04 to -0.88) | -0.22<br>(-0.40 to -0.05) | 0.31<br>(0.16 to 0.47)    | -0.68<br>(-0.90 to -0.46) | -0.37<br>(-0.53 to -0.22) | 0.18<br>(0.04 to 0.32)    | -0.84<br>(-1.04 to -0.64) |
| Croatia                                        | -1.51<br>(-1.63 to -1.39) | -1.45<br>(-1.58 to -1.32) | -1.57<br>(-1.68 to -1.46) | -1.94<br>(-2.15 to -1.72) | -1.73<br>(-1.88 to -1.58) | -2.14<br>(-2.42 to -1.86) | -2.39<br>(-2.61 to -2.17) | -2.14<br>(-2.30 to -1.99) | -2.60<br>(-2.88 to -2.31) |
| Cuba                                           | -1.03<br>(-1.11 to -0.95) | -0.78<br>(-0.84 to -0.71) | -1.21<br>(-1.30 to -1.11) | -1.66<br>(-1.91 to -1.40) | -1.38<br>(-1.66 to -1.11) | -1.89<br>(-2.14 to -1.65) | -1.84<br>(-2.05 to -1.62) | -1.58<br>(-1.82 to -1.35) | -2.05<br>(-2.27 to -1.84) |
| Cyprus                                         | -1.87<br>(-2.06 to -1.68) | -1.69<br>(-1.84 to -1.53) | -2.04<br>(-2.28 to -1.80) | -4.04<br>(-4.27 to -3.81) | -3.76<br>(-3.95 to -3.57) | -4.32<br>(-4.57 to -4.06) | -3.82<br>(-3.98 to -3.66) | -3.47<br>(-3.59 to -3.35) | -4.11<br>(-4.30 to -3.93) |
| Czechia                                        | -1.52<br>(-1.65 to -1.39) | -1.20<br>(-1.31 to -1.09) | -1.77<br>(-1.91 to -1.62) | -2.93<br>(-3.19 to -2.66) | -2.60<br>(-2.81 to -2.39) | -3.15<br>(-3.46 to -2.84) | -2.90<br>(-3.08 to -2.73) | -2.71<br>(-2.90 to -2.52) | -3.03<br>(-3.23 to -2.83) |
| Democratic<br>People's<br>Republic of<br>Korea | -0.99<br>(-1.07 to -0.91) | -0.80<br>(-0.87 to -0.73) | -1.12<br>(-1.21 to -1.03) | -1.61<br>(-1.68 to -1.55) | -1.45<br>(-1.51 to -1.38) | -1.75<br>(-1.82 to -1.68) | -1.42<br>(-1.49 to -1.35) | -1.28<br>(-1.34 to -1.22) | -1.57<br>(-1.64 to -1.51) |
| Democratic<br>Republic of the<br>Congo         | -0.02<br>(-0.05 to 0.01)  | 0.05<br>(0.01 to 0.08)    | -0.06<br>(-0.10 to -0.01) | -0.12<br>(-0.22 to -0.03) | 0.11<br>(-0.03 to 0.26)   | -0.26<br>(-0.34 to -0.17) | -0.24<br>(-0.32 to -0.17) | -0.05<br>(-0.17 to 0.07)  | -0.49<br>(-0.56 to -0.43) |
| Denmark                                        | -1.32<br>(-1.39 to -1.25) | -0.87<br>(-0.93 to -0.80) | -1.63<br>(-1.71 to -1.54) | -2.06<br>(-2.29 to -1.83) | -1.51<br>(-1.78 to -1.24) | -2.43<br>(-2.65 to -2.20) | -2.65<br>(-2.86 to -2.44) | -2.23<br>(-2.46 to -1.99) | -2.95<br>(-3.15 to -2.74) |

|                       |                           |                           |                           |                           |                           |                           |                           |                           |                           |
|-----------------------|---------------------------|---------------------------|---------------------------|---------------------------|---------------------------|---------------------------|---------------------------|---------------------------|---------------------------|
| Djibouti              | -0.51<br>(-0.57 to -0.46) | -0.52<br>(-0.57 to -0.47) | -0.58<br>(-0.64 to -0.52) | -1.13<br>(-1.27 to -0.99) | -1.32<br>(-1.48 to -1.16) | -1.00<br>(-1.09 to -0.90) | -1.05<br>(-1.21 to -0.90) | -1.16<br>(-1.33 to -0.99) | -0.98<br>(-1.09 to -0.87) |
| Dominica              | -0.67<br>(-0.74 to -0.60) | -0.57<br>(-0.64 to -0.50) | -0.74<br>(-0.80 to -0.68) | -0.98<br>(-1.15 to -0.81) | -1.24<br>(-1.43 to -1.05) | -0.91<br>(-1.07 to -0.76) | -0.85<br>(-1.04 to -0.67) | -1.00<br>(-1.20 to -0.81) | -0.87<br>(-1.05 to -0.68) |
| Dominican<br>Republic | 0.42<br>(0.36 to 0.47)    | 0.30<br>(0.25 to 0.35)    | 0.52<br>(0.46 to 0.58)    | -0.37<br>(-0.57 to -0.17) | -0.56<br>(-0.72 to -0.39) | -0.24<br>(-0.48 to 0)     | -0.45<br>(-0.66 to -0.24) | -0.56<br>(-0.77 to -0.36) | -0.35<br>(-0.57 to -0.13) |
| Ecuador               | -0.32<br>(-0.35 to -0.28) | -0.24<br>(-0.30 to -0.18) | -0.39<br>(-0.42 to -0.37) | 1.00<br>(0.74 to 1.26)    | 1.09<br>(0.83 to 1.34)    | 0.90<br>(0.62 to 1.19)    | 0.21<br>(-0.06 to 0.48)   | 0.31<br>(0.02 to 0.60)    | 0.11<br>(-0.16 to 0.39)   |
| Egypt                 | -1.20<br>(-1.27 to -1.13) | -1.29<br>(-1.37 to -1.21) | -1.09<br>(-1.15 to -1.02) | -2.92<br>(-3 to -2.84)    | -3.57<br>(-3.67 to -3.47) | -1.73<br>(-1.92 to -1.55) | -3.34<br>(-3.44 to -3.24) | -3.75<br>(-3.84 to -3.66) | -2.70<br>(-2.87 to -2.52) |
| El Salvador           | -1.34<br>(-1.55 to -1.13) | -1.61<br>(-1.86 to -1.35) | -1.23<br>(-1.41 to -1.05) | -1.47<br>(-1.89 to -1.05) | -1.84<br>(-2.29 to -1.39) | -1.27<br>(-1.67 to -0.88) | -1.68<br>(-2.11 to -1.25) | -1.94<br>(-2.45 to -1.44) | -1.54<br>(-1.91 to -1.17) |
| Equatorial<br>Guinea  | -1.65<br>(-1.81 to -1.49) | -1.89<br>(-2.07 to -1.71) | -1.48<br>(-1.61 to -1.35) | -4.15<br>(-4.71 to -3.58) | -5.18<br>(-5.93 to -4.42) | -3.10<br>(-3.47 to -2.74) | -3.79<br>(-4.28 to -3.29) | -4.70<br>(-5.37 to -4.02) | -2.86<br>(-3.18 to -2.54) |
| Eritrea               | -0.54<br>(-0.61 to -0.48) | -0.67<br>(-0.73 to -0.61) | -0.46<br>(-0.53 to -0.40) | -1.40<br>(-1.55 to -1.25) | -1.64<br>(-1.76 to -1.53) | -0.98<br>(-1.17 to -0.79) | -1.39<br>(-1.53 to -1.25) | -1.66<br>(-1.77 to -1.54) | -0.97<br>(-1.16 to -0.78) |
| Estonia               | -1.73<br>(-1.88 to -1.58) | -1.59<br>(-1.71 to -1.47) | -1.85<br>(-2.03 to -1.68) | -2.37<br>(-3.03 to -1.71) | -2.25<br>(-2.74 to -1.76) | -2.52<br>(-3.38 to -1.66) | -2.98<br>(-3.50 to -2.45) | -2.92<br>(-3.36 to -2.48) | -3.06<br>(-3.74 to -2.37) |
| Eswatini              | -0.16<br>(-0.27 to -0.05) | 0.01<br>(-0.06 to 0.08)   | -0.31<br>(-0.45 to -0.17) | 0.04<br>(-0.42 to 0.50)   | -0.27<br>(-0.65 to 0.10)  | 0.34<br>(-0.21 to 0.88)   | 0.19<br>(-0.28 to 0.66)   | 0.04<br>(-0.38 to 0.45)   | 0.35<br>(-0.18 to 0.89)   |
| Ethiopia              | -1.95<br>(-2.11 to -1.79) | -1.74<br>(-1.88 to -1.60) | -2.29<br>(-2.48 to -2.10) | -2.96<br>(-3.11 to -2.81) | -3.00<br>(-3.12 to -2.87) | -2.88<br>(-3.05 to -2.71) | -2.87<br>(-3.00 to -2.74) | -2.89<br>(-3 to -2.78)    | -2.76<br>(-2.92 to -2.60) |



|           |                           |                           |                           |                           |                           |                           |                           |                           |                           |
|-----------|---------------------------|---------------------------|---------------------------|---------------------------|---------------------------|---------------------------|---------------------------|---------------------------|---------------------------|
| Fiji      | -0.91<br>(-1 to -0.82)    | -1.11<br>(-1.20 to -1.02) | -0.90<br>(-0.99 to -0.82) | -1.04<br>(-1.19 to -0.89) | -1.36<br>(-1.48 to -1.25) | -1.01<br>(-1.16 to -0.85) | -1.07<br>(-1.18 to -0.96) | -1.25<br>(-1.35 to -1.14) | -1.01<br>(-1.12 to -0.90) |
| Finland   | -1.14<br>(-1.41 to -0.87) | -1.16<br>(-1.45 to -0.86) | -1.08<br>(-1.34 to -0.82) | -2.32<br>(-2.45 to -2.18) | -2.22<br>(-2.36 to -2.07) | -2.36<br>(-2.51 to -2.21) | -2.48<br>(-2.62 to -2.34) | -2.49<br>(-2.64 to -2.34) | -2.44<br>(-2.58 to -2.29) |
| France    | 0.09<br>(0.04 to 0.13)    | -0.20<br>(-0.23 to -0.16) | 0.37<br>(0.30 to 0.44)    | -0.70<br>(-1.12 to -0.27) | -0.46<br>(-0.96 to 0.04)  | -0.79<br>(-1.19 to -0.39) | -0.77<br>(-1.10 to -0.43) | -0.75<br>(-1.11 to -0.39) | -0.73<br>(-1.05 to -0.41) |
| Gabon     | -0.81<br>(-0.88 to -0.73) | -0.79<br>(-0.86 to -0.72) | -0.80<br>(-0.89 to -0.71) | -1.10<br>(-1.23 to -0.97) | -1.28<br>(-1.33 to -1.24) | -0.90<br>(-1.14 to -0.66) | -1.01<br>(-1.14 to -0.89) | -1.14<br>(-1.19 to -1.08) | -0.87<br>(-1.10 to -0.65) |
| Gambia    | -0.36<br>(-0.40 to -0.31) | -0.34<br>(-0.39 to -0.28) | -0.34<br>(-0.38 to -0.29) | -0.12<br>(-0.28 to 0.05)  | -0.33<br>(-0.50 to -0.16) | 0.24<br>(0.06 to 0.41)    | -0.21<br>(-0.40 to -0.03) | -0.37<br>(-0.57 to -0.18) | 0.12<br>(-0.06 to 0.31)   |
| Georgia   | 0.83<br>(0.73 – 0.94)     | 0.88<br>(0.75 – 1.01)     | 0.66<br>(0.51 – 0.80)     | 2.74<br>(1.79 – 3.69)     | 2.57<br>(1.59 – 3.56)     | 2.87<br>(1.93 – 3.82)     | 1.82<br>(1.09 – 2.55)     | 1.87<br>(1.11 – 2.65)     | 1.65<br>(0.94 – 2.36)     |
| Germany   | -1.05<br>(-1.10 to -1.00) | -0.69<br>(-0.75 to -0.63) | -1.28<br>(-1.35 to -1.20) | -2.00<br>(-2.18 to -1.82) | -1.56<br>(-1.74 to -1.37) | -2.14<br>(-2.33 to -1.95) | -2.23<br>(-2.36 to -2.10) | -2.11<br>(-2.24 to -1.99) | -2.23<br>(-2.37 to -2.08) |
| Ghana     | -0.29<br>(-0.36 to -0.22) | 0.01<br>(-0.05 to 0.06)   | -0.57<br>(-0.66 to -0.48) | -0.36<br>(-0.59 to -0.14) | -0.15<br>(-0.35 to 0.04)  | -0.57<br>(-0.85 to -0.29) | -0.51<br>(-0.70 to -0.32) | -0.25<br>(-0.40 to -0.10) | -0.78<br>(-1.01 to -0.54) |
| Greece    | 0.20<br>(0.10 to 0.31)    | 0.32<br>(0.21 to 0.43)    | 0.13<br>(-0.01 to 0.28)   | -0.71<br>(-0.97 to -0.45) | -0.32<br>(-0.60 to -0.05) | -0.97<br>(-1.22 to -0.73) | -0.55<br>(-0.75 to -0.35) | -0.28<br>(-0.51 to -0.06) | -0.78<br>(-0.97 to -0.58) |
| Greenland | 0.14<br>(0.02 to 0.26)    | 0.53<br>(0.30 to 0.76)    | -0.11<br>(-0.25 to 0.04)  | -3.27<br>(-3.40 to -3.15) | -2.44<br>(-2.54 to -2.34) | -3.65<br>(-3.83 to -3.47) | -3.39<br>(-3.51 to -3.27) | -2.79<br>(-2.90 to -2.67) | -3.74<br>(-3.92 to -3.55) |
| Grenada   | -0.86<br>(-0.93 to -0.79) | -0.69<br>(-0.74 to -0.63) | -0.71<br>(-0.82 to -0.61) | -1.44<br>(-1.58 to -1.29) | -1.39<br>(-1.86 to -0.92) | -1.16<br>(-1.43 to -0.88) | -1.62<br>(-1.77 to -1.46) | -1.66<br>(-1.92 to -1.39) | -1.46<br>(-1.72 to -1.21) |

|               |                           |                           |                           |                           |                           |                           |                           |                           |                           |
|---------------|---------------------------|---------------------------|---------------------------|---------------------------|---------------------------|---------------------------|---------------------------|---------------------------|---------------------------|
| Guam          | -0.79<br>(-0.85 to -0.72) | -0.39<br>(-0.42 to -0.36) | -1.17<br>(-1.27 to -1.06) | -2.21<br>(-2.50 to -1.92) | -1.01<br>(-1.24 to -0.78) | -3.15<br>(-3.50 to -2.79) | -1.08<br>(-1.25 to -0.90) | -0.55<br>(-0.71 to -0.40) | -1.60<br>(-1.82 to -1.37) |
| Guatemala     | -0.04<br>(-0.07 to -0.01) | 0.22<br>(0.20 to 0.24)    | -0.27<br>(-0.31 to -0.23) | 0.57<br>(0.27 to 0.86)    | 0.82<br>(0.47 to 1.16)    | 0.32<br>(0.05 to 0.58)    | 0.38<br>(0.10 to 0.66)    | 0.71<br>(0.37 to 1.05)    | 0.07<br>(-0.18 to 0.32)   |
| Guinea        | -0.22<br>(-0.25 to -0.19) | -0.06<br>(-0.10 to -0.01) | -0.42<br>(-0.44 to -0.39) | 0.05<br>(-0.09 to 0.19)   | 0.07<br>(-0.11 to 0.26)   | 0.03<br>(-0.09 to 0.15)   | 0.02<br>(-0.11 to 0.15)   | 0.09<br>(-0.08 to 0.26)   | -0.05<br>(-0.16 to 0.06)  |
| Guinea-Bissau | -0.56<br>(-0.62 to -0.50) | -0.45<br>(-0.51 to -0.38) | -0.65<br>(-0.71 to -0.60) | -0.43<br>(-0.52 to -0.34) | -0.71<br>(-0.79 to -0.62) | -0.12<br>(-0.21 to -0.02) | -0.53<br>(-0.61 to -0.44) | -0.70<br>(-0.79 to -0.62) | -0.31<br>(-0.40 to -0.21) |
| Guyana        | -1.03<br>(-1.14 to -0.92) | -1.16<br>(-1.29 to -1.04) | -0.91<br>(-1 to -0.82)    | -0.79<br>(-0.95 to -0.62) | -0.99<br>(-1.21 to -0.77) | -0.53<br>(-0.72 to -0.34) | -0.79<br>(-0.95 to -0.64) | -1.02<br>(-1.24 to -0.80) | -0.51<br>(-0.70 to -0.32) |
| Haiti         | -0.28<br>(-0.36 to -0.20) | -0.23<br>(-0.34 to -0.11) | -0.35<br>(-0.41 to -0.29) | -0.69<br>(-0.76 to -0.62) | -0.81<br>(-0.94 to -0.67) | -0.66<br>(-0.75 to -0.57) | -0.81<br>(-0.89 to -0.72) | -0.83<br>(-0.99 to -0.68) | -0.81<br>(-0.89 to -0.73) |
| Honduras      | 0.02<br>(-0.01 to 0.06)   | -0.07<br>(-0.10 to -0.04) | 0.06<br>(-0.02 to 0.14)   | 1.05<br>(0.88 to 1.23)    | 0.49<br>(0.39 to 0.60)    | 1.38<br>(1.11 to 1.66)    | 0.16<br>(0.03 to 0.28)    | -0.33<br>(-0.39 to -0.27) | 0.44<br>(0.24 to 0.63)    |
| Hungary       | -1.06<br>(-1.13 to -0.99) | -0.81<br>(-0.86 to -0.76) | -1.25<br>(-1.33 to -1.16) | -2.01<br>(-2.25 to -1.76) | -1.79<br>(-2.01 to -1.58) | -2.16<br>(-2.43 to -1.88) | -2.38<br>(-2.56 to -2.19) | -2.23<br>(-2.39 to -2.07) | -2.48<br>(-2.70 to -2.25) |
| Iceland       | -1.19<br>(-1.26 to -1.12) | -0.49<br>(-0.52 to -0.45) | -1.74<br>(-1.86 to -1.62) | -1.82<br>(-2.09 to -1.56) | -1.05<br>(-1.33 to -0.78) | -2.35<br>(-2.64 to -2.06) | -2.22<br>(-2.37 to -2.07) | -1.53<br>(-1.67 to -1.39) | -2.75<br>(-2.94 to -2.56) |
| India         | -1.30<br>(-1.43 to -1.17) | -1.18<br>(-1.30 to -1.07) | -1.41<br>(-1.57 to -1.25) | -1.37<br>(-1.44 to -1.29) | -1.46<br>(-1.52 to -1.41) | -1.13<br>(-1.25 to -1.01) | -1.38<br>(-1.44 to -1.32) | -1.45<br>(-1.50 to -1.40) | -1.23<br>(-1.33 to -1.12) |
| Indonesia     | -0.83<br>(-0.88 to -0.77) | -0.68<br>(-0.73 to -0.64) | -0.95<br>(-1.02 to -0.87) | -0.81<br>(-0.93 to -0.70) | -0.76<br>(-0.88 to -0.65) | -0.88<br>(-1.01 to -0.76) | -1.02<br>(-1.12 to -0.91) | -0.86<br>(-0.96 to -0.75) | -1.16<br>(-1.27 to -1.05) |

|                            |                           |                           |                           |                           |                           |                           |                           |                           |                           |
|----------------------------|---------------------------|---------------------------|---------------------------|---------------------------|---------------------------|---------------------------|---------------------------|---------------------------|---------------------------|
| Iran (Islamic Republic of) | -1.43<br>(-1.54 to -1.32) | -1.49<br>(-1.61 to -1.38) | -1.39<br>(-1.50 to -1.27) | -3.23<br>(-3.35 to -3.10) | -3.42<br>(-3.53 to -3.32) | -2.99<br>(-3.15 to -2.82) | -3.04<br>(-3.14 to -2.95) | -3.06<br>(-3.12 to -3.00) | -3.02<br>(-3.17 to -2.87) |
| Iraq                       | -2.17<br>(-2.38 to -1.96) | -1.83<br>(-2.00 to -1.65) | -2.42<br>(-2.66 to -2.19) | -2.68<br>(-2.92 to -2.43) | -2.86<br>(-3.12 to -2.60) | -2.48<br>(-2.72 to -2.25) | -2.86<br>(-3.10 to -2.63) | -2.97<br>(-3.21 to -2.72) | -2.76<br>(-2.98 to -2.53) |
| Ireland                    | -1.99<br>(-2.13 to -1.85) | -1.51<br>(-1.61 to -1.40) | -2.30<br>(-2.46 to -2.14) | -2.43<br>(-2.62 to -2.23) | -1.61<br>(-1.80 to -1.42) | -2.94<br>(-3.16 to -2.73) | -2.91<br>(-3.11 to -2.71) | -2.24<br>(-2.46 to -2.03) | -3.38<br>(-3.60 to -3.16) |
| Israel                     | -0.76<br>(-0.82 to -0.70) | -0.46<br>(-0.51 to -0.42) | -0.97<br>(-1.04 to -0.90) | -0.97<br>(-1.27 to -0.66) | 0.08<br>(-0.20 to 0.35)   | -1.97<br>(-2.34 to -1.60) | -1.67<br>(-1.84 to -1.50) | -1.02<br>(-1.19 to -0.85) | -2.29<br>(-2.47 to -2.10) |
| Italy                      | -1.16<br>(-1.25 to -1.07) | -1.15<br>(-1.22 to -1.08) | -1.14<br>(-1.25 to -1.03) | -0.82<br>(-1.12 to -0.52) | -0.17<br>(-0.55 to 0.21)  | -1.21<br>(-1.47 to -0.94) | -1.70<br>(-1.87 to -1.52) | -1.38<br>(-1.62 to -1.15) | -1.91<br>(-2.05 to -1.77) |
| Jamaica                    | -0.48<br>(-0.60 to -0.36) | -0.43<br>(-0.54 to -0.31) | -0.50<br>(-0.63 to -0.38) | -0.61<br>(-1.00 to -0.22) | -0.51<br>(-1.04 to 0.02)  | -0.67<br>(-1.01 to -0.32) | -1.06<br>(-1.47 to -0.65) | -1.22<br>(-1.75 to -0.69) | -0.93<br>(-1.29 to -0.56) |
| Japan                      | -0.21<br>(-0.31 to -0.11) | -0.01<br>(-0.12 to 0.10)  | -0.26<br>(-0.37 to -0.15) | -2.36<br>(-2.52 to -2.21) | -1.85<br>(-2.03 to -1.67) | -2.74<br>(-2.88 to -2.59) | -1.91<br>(-2.02 to -1.80) | -1.58<br>(-1.72 to -1.43) | -2.18<br>(-2.28 to -2.08) |
| Jordan                     | -1.31<br>(-1.43 to -1.18) | -1.11<br>(-1.22 to -1.01) | -1.53<br>(-1.68 to -1.38) | -2.60<br>(-2.78 to -2.41) | -2.55<br>(-2.66 to -2.44) | -2.57<br>(-2.90 to -2.23) | -2.37<br>(-2.50 to -2.23) | -2.24<br>(-2.33 to -2.15) | -2.46<br>(-2.67 to -2.26) |
| Kazakhstan                 | 0.08<br>(0.04 to 0.12)    | 0.32<br>(0.28 to 0.36)    | -0.18<br>(-0.23 to -0.13) | 0.03<br>(-0.20 to 0.25)   | 0.23<br>(-0.05 to 0.52)   | -0.22<br>(-0.46 to 0.02)  | -0.47<br>(-0.76 to -0.18) | -0.15<br>(-0.48 to 0.17)  | -0.83<br>(-1.13 to -0.54) |
| Kenya                      | -0.46<br>(-0.55 to -0.37) | -0.33<br>(-0.46 to -0.21) | -0.53<br>(-0.59 to -0.47) | 0.01<br>(-0.18 to 0.19)   | -0.10<br>(-0.37 to 0.18)  | 0.47<br>(0.22 – 0.72)     | 0.04<br>(-0.17 to 0.24)   | -0.04<br>(-0.32 to 0.23)  | 0.24<br>(0.05 to 0.44)    |
| Kiribati                   | 0.27<br>(0.19 – 0.35)     | 0.80<br>(0.66 – 0.94)     | -0.22<br>(-0.27 to -0.17) | -0.25<br>(-0.31 to -0.19) | -0.36<br>(-0.43 to -0.29) | -0.09<br>(-0.15 to -0.03) | -0.33<br>(-0.39 to -0.27) | -0.27<br>(-0.34 to -0.19) | -0.44<br>(-0.48 to -0.40) |

|                                        |                           |                           |                           |                           |                           |                           |                           |                           |                           |
|----------------------------------------|---------------------------|---------------------------|---------------------------|---------------------------|---------------------------|---------------------------|---------------------------|---------------------------|---------------------------|
| Kuwait                                 | -0.62<br>(-0.69 to -0.55) | -0.66<br>(-0.73 to -0.58) | -0.79<br>(-0.86 to -0.71) | -4.64<br>(-5.44 to -3.83) | -3.17<br>(-3.91 to -2.41) | -7.04<br>(-7.96 to -6.11) | -3.67<br>(-4.25 to -3.09) | -2.70<br>(-3.26 to -2.15) | -5.01<br>(-5.67 to -4.34) |
| Kyrgyzstan                             | -0.66<br>(-0.77 to -0.56) | -0.37<br>(-0.48 to -0.27) | -1.01<br>(-1.12 to -0.90) | -0.43<br>(-0.80 to -0.06) | -0.54<br>(-0.84 to -0.24) | -0.46<br>(-0.90 to -0.03) | -0.78<br>(-1.20 to -0.36) | -0.71<br>(-1.10 to -0.31) | -0.93<br>(-1.36 to -0.49) |
| Lao People's<br>Democratic<br>Republic | -1.19<br>(-1.30 to -1.09) | -1.16<br>(-1.25 to -1.06) | -1.24<br>(-1.36 to -1.13) | -2.85<br>(-2.94 to -2.77) | -2.82<br>(-2.90 to -2.74) | -2.91<br>(-3.00 to -2.82) | -2.81<br>(-2.89 to -2.73) | -2.66<br>(-2.73 to -2.59) | -2.96<br>(-3.05 to -2.87) |
| Latvia                                 | -1.57<br>(-1.69 to -1.44) | -1.44<br>(-1.57 to -1.32) | -1.68<br>(-1.81 to -1.55) | -1.79<br>(-2.33 to -1.25) | -1.56<br>(-2 to -1.11)    | -2.03<br>(-2.67 to -1.39) | -2.09<br>(-2.56 to -1.63) | -1.91<br>(-2.33 to -1.49) | -2.34<br>(-2.89 to -1.79) |
| Lebanon                                | -1.71<br>(-1.83 to -1.59) | -1.80<br>(-1.93 to -1.68) | -1.63<br>(-1.75 to -1.51) | -4.88<br>(-5.17 to -4.58) | -4.94<br>(-5.29 to -4.60) | -4.87<br>(-5.13 to -4.61) | -4.57<br>(-4.88 to -4.26) | -4.55<br>(-4.89 to -4.21) | -4.62<br>(-4.91 to -4.32) |
| Lesotho                                | 0.54<br>(0.44 – 0.64)     | 0.21<br>(0.15 – 0.28)     | 0.74<br>(0.62 – 0.86)     | 1.66<br>(1.25 – 2.07)     | 0.53<br>(0.27 – 0.80)     | 2.62<br>(2.03 – 3.23)     | 1.76<br>(1.37 – 2.16)     | 0.90<br>(0.60 – 1.19)     | 2.53<br>(1.98 – 3.08)     |
| Liberia                                | -0.60<br>(-0.65 to -0.55) | -0.58<br>(-0.63 to -0.53) | -0.64<br>(-0.69 to -0.58) | -0.49<br>(-0.67 to -0.32) | -0.67<br>(-0.90 to -0.44) | -0.32<br>(-0.46 to -0.18) | -0.51<br>(-0.67 to -0.35) | -0.65<br>(-0.84 to -0.46) | -0.37<br>(-0.50 to -0.23) |
| Libya                                  | -1.17<br>(-1.28 to -1.05) | -1.10<br>(-1.20 to -1.00) | -1.25<br>(-1.38 to -1.12) | -0.41<br>(-0.66 to -0.16) | -1.05<br>(-1.41 to -0.69) | -0.03<br>(-0.22 to 0.16)  | -0.58<br>(-0.85 to -0.30) | -0.94<br>(-1.31 to -0.58) | -0.38<br>(-0.61 to -0.16) |
| Lithuania                              | -0.72<br>(-0.81 to -0.63) | -0.70<br>(-0.78 to -0.62) | -0.73<br>(-0.84 to -0.62) | -0.57<br>(-1.23 to 0.10)  | -0.51<br>(-1.04 to 0.02)  | -0.61<br>(-1.41 to 0.20)  | -0.92<br>(-1.50 to -0.34) | -0.88<br>(-1.38 to -0.38) | -0.99<br>(-1.68 to -0.29) |
| Luxembourg                             | -1.41<br>(-1.67 to -1.15) | -1.29<br>(-1.53 to -1.04) | -1.48<br>(-1.76 to -1.20) | -2.43<br>(-2.73 to -2.14) | -1.82<br>(-2.07 to -1.57) | -2.76<br>(-3.10 to -2.42) | -2.98<br>(-3.20 to -2.75) | -2.70<br>(-2.90 to -2.50) | -3.13<br>(-3.40 to -2.87) |

|                  |                           |                           |                           |                           |                           |                           |                           |                           |                           |
|------------------|---------------------------|---------------------------|---------------------------|---------------------------|---------------------------|---------------------------|---------------------------|---------------------------|---------------------------|
| Madagascar       | -0.25<br>(-0.29 to -0.21) | -0.11<br>(-0.15 to -0.08) | -0.39<br>(-0.44 to -0.34) | -0.71<br>(-0.76 to -0.66) | -0.82<br>(-0.86 to -0.78) | -0.37<br>(-0.43 to -0.32) | -0.63<br>(-0.68 to -0.59) | -0.72<br>(-0.76 to -0.68) | -0.41<br>(-0.46 to -0.36) |
| Malawi           | -0.44<br>(-0.48 to -0.39) | -0.22<br>(-0.28 to -0.16) | -0.63<br>(-0.69 to -0.57) | -0.49<br>(-0.66 to -0.32) | -0.27<br>(-0.48 to -0.07) | -0.66<br>(-0.79 to -0.53) | -0.42<br>(-0.59 to -0.25) | -0.15<br>(-0.36 to 0.05)  | -0.76<br>(-0.88 to -0.64) |
| Malaysia         | -1.48<br>(-1.58 to -1.39) | -1.43<br>(-1.54 to -1.31) | -1.50<br>(-1.59 to -1.41) | -1.56<br>(-1.68 to -1.45) | -2.10<br>(-2.25 to -1.94) | -1.11<br>(-1.24 to -0.99) | -1.55<br>(-1.68 to -1.41) | -1.79<br>(-1.97 to -1.61) | -1.30<br>(-1.43 to -1.18) |
| Maldives         | -2.10<br>(-2.25 to -1.94) | -1.82<br>(-1.96 to -1.68) | -2.45<br>(-2.62 to -2.28) | -4.08<br>(-4.22 to -3.94) | -3.90<br>(-4.00 to -3.81) | -4.47<br>(-4.65 to -4.28) | -4.09<br>(-4.25 to -3.93) | -3.75<br>(-3.86 to -3.65) | -4.60<br>(-4.80 to -4.39) |
| Mali             | -0.64<br>(-0.69 to -0.60) | -0.50<br>(-0.53 to -0.46) | -0.90<br>(-0.97 to -0.83) | -0.78<br>(-0.89 to -0.67) | -0.73<br>(-0.89 to -0.56) | -0.81<br>(-0.88 to -0.74) | -0.75<br>(-0.84 to -0.65) | -0.61<br>(-0.75 to -0.47) | -0.85<br>(-0.91 to -0.79) |
| Malta            | -1.15<br>(-1.28 to -1.01) | -0.95<br>(-1.07 to -0.82) | -1.25<br>(-1.39 to -1.10) | -1.62<br>(-1.89 to -1.34) | -1.10<br>(-1.41 to -0.79) | -1.96<br>(-2.23 to -1.70) | -1.48<br>(-1.64 to -1.32) | -1.20<br>(-1.39 to -1.00) | -1.65<br>(-1.81 to -1.50) |
| Marshall Islands | -0.16<br>(-0.24 to -0.08) | 0.01<br>(-0.06 to 0.09)   | -0.21<br>(-0.31 to -0.11) | -1.04<br>(-1.13 to -0.96) | -0.93<br>(-0.99 to -0.87) | -0.89<br>(-1.05 to -0.73) | -0.73<br>(-0.84 to -0.63) | -0.72<br>(-0.78 to -0.65) | -0.63<br>(-0.82 to -0.44) |
| Mauritania       | -0.87<br>(-0.93 to -0.81) | -0.88<br>(-0.94 to -0.82) | -0.89<br>(-0.96 to -0.82) | -1.43<br>(-1.54 to -1.32) | -1.64<br>(-1.76 to -1.53) | -1.18<br>(-1.28 to -1.07) | -1.43<br>(-1.52 to -1.34) | -1.63<br>(-1.72 to -1.53) | -1.19<br>(-1.27 to -1.10) |
| Mauritius        | -0.77<br>(-0.85 to -0.69) | -0.70<br>(-0.75 to -0.64) | -0.83<br>(-0.93 to -0.73) | -1.37<br>(-1.71 to -1.02) | -1.18<br>(-1.52 to -0.84) | -1.52<br>(-1.94 to -1.09) | -1.00<br>(-1.31 to -0.70) | -0.87<br>(-1.21 to -0.54) | -1.13<br>(-1.48 to -0.78) |
| Mexico           | -0.03<br>(-0.07 to 0.02)  | 0.21<br>(0.15 to 0.26)    | -0.21<br>(-0.25 to -0.17) | 1.09<br>(0.92 to 1.26)    | 1.85<br>(1.67 to 2.03)    | 0.48<br>(0.30 to 0.66)    | 0.68<br>(0.57 to 0.80)    | 1.42<br>(1.29 to 1.54)    | 0.08<br>(-0.04 to 0.20)   |

|                                                      |                           |                           |                           |                           |                           |                           |                           |                           |                           |
|------------------------------------------------------|---------------------------|---------------------------|---------------------------|---------------------------|---------------------------|---------------------------|---------------------------|---------------------------|---------------------------|
| Micronesia<br>(Federated<br>States of<br>Micronesia) | -0.28<br>(-0.34 to -0.22) | -0.15<br>(-0.22 to -0.08) | -0.44<br>(-0.50 to -0.38) | -1.29<br>(-1.40 to -1.18) | -1.28<br>(-1.37 to -1.19) | -1.36<br>(-1.48 to -1.24) | -1.19<br>(-1.28 to -1.11) | -1.15<br>(-1.22 to -1.07) | -1.29<br>(-1.39 to -1.19) |
| Monaco                                               | -1.29<br>(-1.40 to -1.18) | -1.24<br>(-1.35 to -1.13) | -1.33<br>(-1.44 to -1.22) | -2.98<br>(-3.11 to -2.85) | -3.18<br>(-3.36 to -3.00) | -2.83<br>(-2.94 to -2.71) | -2.69<br>(-2.77 to -2.60) | -2.77<br>(-2.91 to -2.63) | -2.61<br>(-2.70 to -2.53) |
| Mongolia                                             | 0.34<br>(0.19 to 0.49)    | 0.74<br>(0.61 to 0.88)    | -0.04<br>(-0.23 to 0.16)  | -0.11<br>(-0.36 to 0.14)  | -0.35<br>(-0.65 to -0.05) | -0.02<br>(-0.25 to 0.20)  | -0.12<br>(-0.37 to 0.13)  | -0.02<br>(-0.31 to 0.28)  | -0.30<br>(-0.51 to -0.09) |
| Montenegro                                           | -0.33<br>(-0.42 to -0.25) | -0.29<br>(-0.38 to -0.21) | -0.36<br>(-0.45 to -0.27) | -0.51<br>(-0.81 to -0.21) | -1.19<br>(-1.47 to -0.91) | -0.12<br>(-0.47 to 0.23)  | -1.04<br>(-1.37 to -0.70) | -1.51<br>(-1.80 to -1.23) | -0.71<br>(-1.11 to -0.31) |
| Morocco                                              | -1.09<br>(-1.17 to -1.02) | -1.02<br>(-1.08 to -0.95) | -1.14<br>(-1.23 to -1.06) | -1.20<br>(-1.26 to -1.13) | -1.37<br>(-1.46 to -1.29) | -1.06<br>(-1.12 to -0.99) | -1.73<br>(-1.77 to -1.68) | -1.90<br>(-1.94 to -1.85) | -1.60<br>(-1.65 to -1.55) |
| Mozambique                                           | 0.03<br>(0.01 - 0.06)     | 0.24<br>(0.21 - 0.28)     | -0.20<br>(-0.24 to -0.15) | 0.64<br>(0.46 - 0.81)     | 0.89<br>(0.68 - 1.10)     | 0.34<br>(0.12 - 0.56)     | 0.83<br>(0.64 - 1.02)     | 1.14<br>(0.92 - 1.36)     | 0.26<br>(0.07 - 0.45)     |
| Myanmar                                              | -1.52<br>(-1.68 to -1.35) | -1.33<br>(-1.48 to -1.18) | -1.70<br>(-1.88 to -1.52) | -2.71<br>(-2.87 to -2.55) | -2.37<br>(-2.49 to -2.25) | -3.04<br>(-3.24 to -2.84) | -2.69<br>(-2.85 to -2.53) | -2.29<br>(-2.41 to -2.16) | -3.14<br>(-3.35 to -2.94) |
| Namibia                                              | -0.77<br>(-0.87 to -0.68) | -0.66<br>(-0.75 to -0.57) | -0.86<br>(-0.95 to -0.76) | -0.97<br>(-1.25 to -0.70) | -0.76<br>(-1.03 to -0.50) | -1.15<br>(-1.43 to -0.87) | -0.93<br>(-1.19 to -0.67) | -0.72<br>(-1 to -0.45)    | -1.14<br>(-1.38 to -0.90) |
| Nauru                                                | -0.36<br>(-0.48 to -0.24) | -0.05<br>(-0.20 to 0.09)  | -0.88<br>(-0.96 to -0.80) | -0.47<br>(-0.93 to 0)     | -0.56<br>(-1.08 to -0.02) | -0.85<br>(-1.24 to -0.46) | -0.42<br>(-0.91 to 0.08)  | -0.42<br>(-0.94 to 0.10)  | -0.61<br>(-1.08 to -0.15) |
| Nepal                                                | -0.79<br>(-0.87 to -0.72) | -0.76<br>(-0.82 to -0.71) | -0.82<br>(-0.91 to -0.72) | -1.54<br>(-1.78 to -1.29) | -1.24<br>(-1.49 to -1.00) | -1.84<br>(-2.10 to -1.58) | -1.62<br>(-1.82 to -1.41) | -1.28<br>(-1.49 to -1.07) | -1.96<br>(-2.18 to -1.75) |

|                          |                           |                           |                           |                           |                           |                           |                           |                           |                           |
|--------------------------|---------------------------|---------------------------|---------------------------|---------------------------|---------------------------|---------------------------|---------------------------|---------------------------|---------------------------|
| Netherlands              | -1.21<br>(-1.28 to -1.14) | -0.86<br>(-0.92 to -0.81) | -1.42<br>(-1.50 to -1.34) | -2.39<br>(-2.66 to -2.12) | -1.71<br>(-2.01 to -1.40) | -2.75<br>(-3.04 to -2.46) | -2.78<br>(-3.03 to -2.53) | -2.29<br>(-2.51 to -2.08) | -3.08<br>(-3.38 to -2.78) |
| New Zealand              | -1.65<br>(-1.82 to -1.49) | -1.33<br>(-1.45 to -1.20) | -1.83<br>(-2.03 to -1.64) | -2.31<br>(-2.53 to -2.10) | -1.87<br>(-2.16 to -1.59) | -2.58<br>(-2.78 to -2.37) | -2.57<br>(-2.75 to -2.38) | -2.15<br>(-2.39 to -1.90) | -2.85<br>(-3.02 to -2.68) |
| Nicaragua                | -0.81<br>(-0.88 to -0.75) | -0.89<br>(-0.97 to -0.82) | -0.80<br>(-0.86 to -0.74) | -0.89<br>(-1.08 to -0.69) | -1.17<br>(-1.35 to -0.99) | -0.80<br>(-1.01 to -0.60) | -1.08<br>(-1.25 to -0.91) | -1.16<br>(-1.33 to -1.00) | -1.07<br>(-1.25 to -0.90) |
| Niger                    | -0.44<br>(-0.49 to -0.39) | -0.37<br>(-0.42 to -0.32) | -0.50<br>(-0.55 to -0.45) | -0.54<br>(-0.59 to -0.49) | -0.48<br>(-0.54 to -0.42) | -0.59<br>(-0.65 to -0.54) | -0.71<br>(-0.77 to -0.65) | -0.62<br>(-0.69 to -0.55) | -0.77<br>(-0.84 to -0.70) |
| Nigeria                  | -1.30<br>(-1.43 to -1.17) | -1.51<br>(-1.66 to -1.36) | -0.99<br>(-1.09 to -0.89) | -2.74<br>(-2.99 to -2.49) | -2.83<br>(-3.08 to -2.57) | -2.30<br>(-2.51 to -2.08) | -2.33<br>(-2.55 to -2.12) | -2.31<br>(-2.53 to -2.10) | -1.95<br>(-2.14 to -1.77) |
| Niue                     | -1.20<br>(-1.28 to -1.11) | -1.26<br>(-1.36 to -1.15) | -1.10<br>(-1.17 to -1.03) | -1.79<br>(-1.99 to -1.60) | -1.86<br>(-2.04 to -1.67) | -1.67<br>(-1.88 to -1.46) | -1.39<br>(-1.66 to -1.12) | -1.51<br>(-1.73 to -1.29) | -1.22<br>(-1.57 to -0.88) |
| North Macedonia          | 0.14<br>(0.02 to 0.25)    | -0.06<br>(-0.17 to 0.05)  | 0.22<br>(0.10 – 0.35)     | -0.78<br>(-1.15 to -0.40) | -1.25<br>(-1.62 to -0.89) | -0.54<br>(-0.93 to -0.15) | -1.30<br>(-1.60 to -1.00) | -1.58<br>(-1.88 to -1.27) | -1.12<br>(-1.42 to -0.82) |
| Northern Mariana Islands | -0.57<br>(-0.61 to -0.53) | -0.25<br>(-0.26 to -0.23) | -0.99<br>(-1.06 to -0.93) | -1.33<br>(-1.48 to -1.18) | -0.13<br>(-0.29 to 0.03)  | -2.24<br>(-2.44 to -2.03) | -1.23<br>(-1.34 to -1.11) | -0.33<br>(-0.46 to -0.20) | -2.17<br>(-2.35 to -2.00) |
| Norway                   | -1.22<br>(-1.36 to -1.07) | -1.06<br>(-1.19 to -0.94) | -1.28<br>(-1.44 to -1.11) | -2.87<br>(-3.17 to -2.57) | -2.09<br>(-2.48 to -1.70) | -3.37<br>(-3.65 to -3.09) | -3.21<br>(-3.43 to -2.99) | -2.71<br>(-2.99 to -2.44) | -3.58<br>(-3.80 to -3.37) |
| Oman                     | 0.12<br>(0.06 – 0.19)     | -0.04<br>(-0.13 to 0.05)  | 0.11<br>(0.03 – 0.18)     | -2.79<br>(-2.97 to -2.61) | -2.83<br>(-3.06 to -2.60) | -2.86<br>(-3.01 to -2.71) | -2.71<br>(-2.83 to -2.60) | -2.77<br>(-2.92 to -2.61) | -2.77<br>(-2.85 to -2.69) |
| Pakistan                 | -0.82<br>(-0.95 to -0.69) | -0.79<br>(-0.91 to -0.67) | -0.84<br>(-0.98 to -0.69) | -0.83<br>(-1.08 to -0.58) | -0.97<br>(-1.25 to -0.69) | -0.65<br>(-0.87 to -0.44) | -0.61<br>(-0.84 to -0.38) | -0.68<br>(-0.94 to -0.41) | -0.54<br>(-0.73 to -0.34) |

|                     |                           |                           |                           |                           |                           |                           |                           |                           |                           |
|---------------------|---------------------------|---------------------------|---------------------------|---------------------------|---------------------------|---------------------------|---------------------------|---------------------------|---------------------------|
| Palau               | -0.87<br>(-0.93 to -0.81) | -0.66<br>(-0.71 to -0.61) | -1.03<br>(-1.09 to -0.97) | -0.82<br>(-0.93 to -0.71) | -1.16<br>(-1.28 to -1.05) | -0.38<br>(-0.52 to -0.24) | -0.75<br>(-0.83 to -0.66) | -0.89<br>(-1 to -0.79)    | -0.67<br>(-0.77 to -0.57) |
| Palestine           | -0.78<br>(-0.85 to -0.71) | -0.37<br>(-0.45 to -0.30) | -1.02<br>(-1.10 to -0.94) | -2.06<br>(-2.34 to -1.78) | -2.07<br>(-2.49 to -1.65) | -1.99<br>(-2.19 to -1.79) | -1.92<br>(-2.07 to -1.77) | -1.90<br>(-2.15 to -1.66) | -1.92<br>(-2.02 to -1.82) |
| Panama              | -0.46<br>(-0.51 to -0.40) | -0.21<br>(-0.25 to -0.17) | -0.65<br>(-0.72 to -0.59) | 0.16<br>(-0.02 to 0.34)   | 0.89<br>(0.73 to 1.05)    | -0.44<br>(-0.67 to -0.22) | 0.06<br>(-0.12 to 0.23)   | 0.64<br>(0.47 to 0.81)    | -0.43<br>(-0.64 to -0.22) |
| Papua New<br>Guinea | -0.65<br>(-0.70 to -0.60) | -0.59<br>(-0.64 to -0.54) | -0.67<br>(-0.73 to -0.61) | -1.25<br>(-1.28 to -1.22) | -1.15<br>(-1.23 to -1.07) | -1.25<br>(-1.30 to -1.20) | -1.14<br>(-1.18 to -1.09) | -1.03<br>(-1.08 to -0.97) | -1.19<br>(-1.28 to -1.09) |
| Paraguay            | -0.46<br>(-0.49 to -0.43) | -0.49<br>(-0.52 to -0.46) | -0.45<br>(-0.50 to -0.41) | -0.48<br>(-0.63 to -0.32) | -0.65<br>(-0.80 to -0.49) | -0.38<br>(-0.55 to -0.21) | -0.79<br>(-0.93 to -0.65) | -0.84<br>(-0.98 to -0.71) | -0.77<br>(-0.92 to -0.62) |
| Peru                | -1.29<br>(-1.39 to -1.19) | -1.15<br>(-1.24 to -1.05) | -1.41<br>(-1.53 to -1.30) | -1.83<br>(-2.15 to -1.50) | -1.98<br>(-2.26 to -1.71) | -1.71<br>(-2.08 to -1.34) | -1.80<br>(-2.08 to -1.52) | -1.85<br>(-2.09 to -1.60) | -1.76<br>(-2.09 to -1.44) |
| Philippines         | 1.17<br>(0.96 – 1.37)     | 1.08<br>(0.89 – 1.27)     | 1.26<br>(1.04 – 1.47)     | 0.69<br>(0.53 – 0.86)     | 0.58<br>(0.40 to 0.77)    | 0.68<br>(0.52 – 0.84)     | 0.84<br>(0.66 – 1.02)     | 0.74<br>(0.54 – 0.95)     | 0.88<br>(0.73 – 1.04)     |
| Poland              | -1.97<br>(-2.14 to -1.80) | -1.69<br>(-1.85 to -1.54) | -2.20<br>(-2.39 to -2.02) | -2.35<br>(-2.68 to -2.01) | -2.16<br>(-2.42 to -1.89) | -2.56<br>(-2.97 to -2.15) | -2.57<br>(-2.86 to -2.28) | -2.37<br>(-2.61 to -2.12) | -2.80<br>(-3.16 to -2.45) |
| Portugal            | -1.51<br>(-1.62 to -1.40) | -1.29<br>(-1.38 to -1.20) | -1.69<br>(-1.82 to -1.56) | -1.44<br>(-1.66 to -1.21) | -1.16<br>(-1.41 to -0.91) | -1.59<br>(-1.80 to -1.39) | -2.01<br>(-2.19 to -1.83) | -1.93<br>(-2.15 to -1.72) | -2.04<br>(-2.21 to -1.87) |
| Puerto Rico         | -0.89<br>(-0.99 to -0.80) | -0.70<br>(-0.77 to -0.62) | -1.00<br>(-1.10 to -0.90) | -2.04<br>(-2.31 to -1.78) | -1.71<br>(-1.99 to -1.44) | -2.29<br>(-2.56 to -2.03) | -2.07<br>(-2.30 to -1.83) | -1.90<br>(-2.15 to -1.64) | -2.21<br>(-2.44 to -1.97) |
| Qatar               | -0.37<br>(-0.41 to -0.33) | -0.47<br>(-0.57 to -0.36) | -0.50<br>(-0.66 to -0.34) | -4.00<br>(-4.54 to -3.46) | -4.26<br>(-4.84 to -3.69) | -3.33<br>(-3.90 to -2.75) | -3.58<br>(-3.98 to -3.18) | -3.84<br>(-4.27 to -3.41) | -3.13<br>(-3.51 to -2.75) |



|                                  |                           |                           |                           |                           |                           |                           |                           |                           |                           |
|----------------------------------|---------------------------|---------------------------|---------------------------|---------------------------|---------------------------|---------------------------|---------------------------|---------------------------|---------------------------|
| Republic of Korea                | -2.12<br>(-2.50 to -1.74) | -1.79<br>(-2.10 to -1.48) | -2.24<br>(-2.67 to -1.80) | -4.78<br>(-4.97 to -4.58) | -4.36<br>(-4.65 to -4.08) | -4.94<br>(-5.11 to -4.76) | -4.41<br>(-4.63 to -4.19) | -4.11<br>(-4.36 to -3.86) | -4.54<br>(-4.76 to -4.32) |
| Republic of Moldova              | -0.88<br>(-0.97 to -0.79) | -0.72<br>(-0.80 to -0.63) | -1.07<br>(-1.17 to -0.97) | -1.50<br>(-2.12 to -0.88) | -1.47<br>(-1.96 to -0.99) | -1.71<br>(-2.50 to -0.92) | -1.35<br>(-1.94 to -0.76) | -1.26<br>(-1.75 to -0.77) | -1.58<br>(-2.31 to -0.85) |
| Romania                          | -0.30<br>(-0.36 to -0.24) | -0.10<br>(-0.17 to -0.03) | -0.49<br>(-0.55 to -0.43) | -0.22<br>(-0.70 to 0.25)  | 0.13<br>(-0.31 to 0.58)   | -0.57<br>(-1.07 to -0.07) | -0.59<br>(-1.01 to -0.17) | -0.21<br>(-0.62 to 0.21)  | -0.98<br>(-1.41 to -0.55) |
| Russian Federation               | -0.19<br>(-0.55 to 0.18)  | -0.30<br>(-0.62 to 0.03)  | -0.15<br>(-0.54 to 0.23)  | -0.38<br>(-1.61 to 0.87)  | -0.71<br>(-1.85 to 0.46)  | -0.19<br>(-1.51 to 1.13)  | -0.68<br>(-1.60 to 0.25)  | -0.82<br>(-1.74 to 0.09)  | -0.54<br>(-1.48 to 0.41)  |
| Rwanda                           | -1.65<br>(-1.80 to -1.50) | -1.27<br>(-1.39 to -1.16) | -1.99<br>(-2.18 to -1.81) | -3.80<br>(-4.15 to -3.44) | -3.49<br>(-3.82 to -3.16) | -4.01<br>(-4.40 to -3.62) | -3.84<br>(-4.19 to -3.48) | -3.66<br>(-4.01 to -3.31) | -4.01<br>(-4.38 to -3.65) |
| Saint Kitts and Nevis            | -1.37<br>(-1.48 to -1.25) | -0.94<br>(-1.03 to -0.85) | -1.65<br>(-1.78 to -1.53) | -2.17<br>(-2.42 to -1.92) | -1.81<br>(-2.07 to -1.55) | -2.61<br>(-2.87 to -2.35) | -2.49<br>(-2.75 to -2.22) | -1.93<br>(-2.22 to -1.64) | -3.00<br>(-3.25 to -2.75) |
| Saint Lucia                      | -1.04<br>(-1.13 to -0.95) | -0.72<br>(-0.77 to -0.66) | -1.19<br>(-1.31 to -1.07) | -2.62<br>(-2.84 to -2.40) | -2.16<br>(-2.36 to -1.96) | -2.86<br>(-3.11 to -2.61) | -2.39<br>(-2.58 to -2.21) | -2.03<br>(-2.20 to -1.86) | -2.58<br>(-2.80 to -2.36) |
| Saint Vincent and the Grenadines | -0.90<br>(-1.02 to -0.78) | -0.86<br>(-1.01 to -0.72) | -0.88<br>(-0.98 to -0.77) | -1.02<br>(-1.17 to -0.86) | -0.65<br>(-0.83 to -0.47) | -1.25<br>(-1.42 to -1.08) | -1.06<br>(-1.19 to -0.93) | -0.72<br>(-0.87 to -0.56) | -1.26<br>(-1.40 to -1.12) |
| Samoa                            | -0.46<br>(-0.50 to -0.42) | -0.56<br>(-0.61 to -0.51) | -0.33<br>(-0.37 to -0.30) | -1.17<br>(-1.39 to -0.95) | -1.72<br>(-1.99 to -1.45) | -0.70<br>(-0.87 to -0.52) | -0.93<br>(-1.13 to -0.74) | -1.35<br>(-1.60 to -1.11) | -0.49<br>(-0.64 to -0.35) |
| San Marino                       | -0.79<br>(-0.86 to -0.71) | -0.91<br>(-1 to -0.83)    | -0.71<br>(-0.77 to -0.64) | -2.59<br>(-2.89 to -2.29) | -2.56<br>(-2.91 to -2.21) | -2.57<br>(-2.83 to -2.30) | -2.04<br>(-2.23 to -1.84) | -2.18<br>(-2.40 to -1.95) | -1.89<br>(-2.06 to -1.71) |
| Sao Tome and Principe            | -0.37<br>(-0.42 to -0.31) | -0.38<br>(-0.42 to -0.34) | -0.40<br>(-0.47 to -0.32) | -0.25<br>(-0.46 to -0.03) | -0.31<br>(-0.50 to -0.12) | -0.24<br>(-0.49 to 0.01)  | -0.28<br>(-0.51 to -0.05) | -0.28<br>(-0.48 to -0.07) | -0.31<br>(-0.58 to -0.04) |

|                 |                           |                           |                           |                           |                           |                           |                           |                           |                           |
|-----------------|---------------------------|---------------------------|---------------------------|---------------------------|---------------------------|---------------------------|---------------------------|---------------------------|---------------------------|
| Saudi Arabia    | -0.92<br>(-0.99 to -0.85) | -1.14<br>(-1.23 to -1.05) | -0.69<br>(-0.74 to -0.65) | -1.43<br>(-1.63 to -1.22) | -1.79<br>(-1.96 to -1.62) | -1.06<br>(-1.30 to -0.81) | -1.42<br>(-1.59 to -1.25) | -1.72<br>(-1.87 to -1.57) | -1.13<br>(-1.33 to -0.93) |
| Senegal         | -0.50<br>(-0.55 to -0.46) | -0.44<br>(-0.49 to -0.40) | -0.56<br>(-0.61 to -0.51) | -0.42<br>(-0.52 to -0.31) | -0.56<br>(-0.66 to -0.47) | -0.24<br>(-0.36 to -0.12) | -0.55<br>(-0.66 to -0.44) | -0.64<br>(-0.75 to -0.53) | -0.43<br>(-0.55 to -0.32) |
| Serbia          | -1.04<br>(-1.18 to -0.91) | -0.97<br>(-1.09 to -0.85) | -1.18<br>(-1.34 to -1.02) | -2.72<br>(-3.03 to -2.41) | -2.47<br>(-2.74 to -2.20) | -2.83<br>(-3.16 to -2.50) | -2.87<br>(-3.17 to -2.57) | -2.69<br>(-2.98 to -2.41) | -2.97<br>(-3.29 to -2.66) |
| Seychelles      | -1.20<br>(-1.29 to -1.10) | -1.45<br>(-1.57 to -1.33) | -0.96<br>(-1.04 to -0.88) | -1.96<br>(-2.17 to -1.74) | -2.57<br>(-2.80 to -2.33) | -1.50<br>(-1.72 to -1.27) | -1.80<br>(-1.98 to -1.63) | -2.27<br>(-2.45 to -2.08) | -1.36<br>(-1.55 to -1.18) |
| Sierra Leone    | -0.26<br>(-0.31 to -0.21) | -0.33<br>(-0.39 to -0.28) | -0.16<br>(-0.21 to -0.11) | 0<br>(0.19 to 0.20)       | -0.50<br>(-0.66 to -0.33) | 0.56<br>(0.32 to 0.80)    | -0.01<br>(-0.20 to 0.17)  | -0.44<br>(-0.60 to -0.29) | 0.50<br>(0.27 to 0.72)    |
| Singapore       | -1.63<br>(-1.75 to -1.52) | -1.22<br>(-1.31 to -1.13) | -1.83<br>(-1.95 to -1.70) | -4.19<br>(-4.39 to -3.98) | -3.91<br>(-4.07 to -3.75) | -4.29<br>(-4.52 to -4.06) | -3.51<br>(-3.62 to -3.41) | -3.37<br>(-3.45 to -3.30) | -3.54<br>(-3.66 to -3.41) |
| Slovakia        | -1.96<br>(-2.10 to -1.81) | -2.00<br>(-2.18 to -1.81) | -1.89<br>(-2.00 to -1.78) | -1.96<br>(-2.04 to -1.87) | -2.06<br>(-2.15 to -1.97) | -1.88<br>(-1.98 to -1.77) | -2.02<br>(-2.11 to -1.92) | -2.17<br>(-2.29 to -2.05) | -1.87<br>(-1.97 to -1.77) |
| Slovenia        | -1.50<br>(-1.63 to -1.37) | -1.30<br>(-1.42 to -1.18) | -1.64<br>(-1.77 to -1.50) | -2.93<br>(-3.23 to -2.62) | -2.82<br>(-3.07 to -2.57) | -3.00<br>(-3.35 to -2.64) | -3.26<br>(-3.51 to -3.00) | -3.25<br>(-3.48 to -3.02) | -3.24<br>(-3.53 to -2.94) |
| Solomon Islands | 0.38<br>(0.26 – 0.50)     | 0.34<br>(0.25 – 0.43)     | 0.26<br>(0.10 – 0.42)     | -0.64<br>(-0.75 to -0.53) | -0.57<br>(-0.65 to -0.48) | -0.88<br>(-1.01 to -0.76) | -0.50<br>(-0.60 to -0.40) | -0.41<br>(-0.49 to -0.33) | -0.70<br>(-0.83 to -0.56) |
| Somalia         | -0.14<br>(-0.17 to -0.10) | 0.03<br>(-0.02 to 0.07)   | -0.24<br>(-0.28 to -0.20) | -1.05<br>(-1.12 to -0.99) | -0.89<br>(-0.95 to -0.84) | -0.84<br>(-0.93 to -0.75) | -1.01<br>(-1.08 to -0.94) | -0.92<br>(-0.97 to -0.86) | -0.88<br>(-0.98 to -0.79) |
| South Africa    | -0.78<br>(-0.92 to -0.64) | -0.71<br>(-0.85 to -0.58) | -0.83<br>(-0.97 to -0.69) | 0.36<br>(0.04 – 0.69)     | 0<br>(0.36 to 0.37)       | 0.67<br>(0.35 – 0.98)     | -0.14<br>(-0.40 to 0.12)  | -0.36<br>(-0.66 to -0.06) | 0.05<br>(-0.22 to 0.32)   |

|                                  |                           |                           |                           |                           |                           |                           |                           |                           |                           |
|----------------------------------|---------------------------|---------------------------|---------------------------|---------------------------|---------------------------|---------------------------|---------------------------|---------------------------|---------------------------|
| South Sudan                      | -0.46<br>(-0.54 to -0.38) | -0.33<br>(-0.43 to -0.23) | -0.59<br>(-0.66 to -0.52) | -0.95<br>(-1.31 to -0.60) | -0.97<br>(-1.34 to -0.60) | -0.69<br>(-1.07 to -0.31) | -0.88<br>(-1.22 to -0.53) | -0.86<br>(-1.21 to -0.50) | -0.62<br>(-0.98 to -0.26) |
| Spain                            | -0.29<br>(-0.40 to -0.18) | -0.21<br>(-0.30 to -0.13) | -0.35<br>(-0.48 to -0.22) | 0.04<br>(-0.35 to 0.42)   | 0.50<br>(0.12 to 0.89)    | -0.21<br>(-0.60 to 0.18)  | -0.87<br>(-1.11 to -0.63) | -0.80<br>(-1.04 to -0.56) | -0.85<br>(-1.10 to -0.60) |
| Sri Lanka                        | -1.28<br>(-1.4 to -1.17)  | -1.30<br>(-1.43 to -1.16) | -1.22<br>(-1.32 to -1.12) | -1.49<br>(-1.69 to -1.30) | -1.66<br>(-1.88 to -1.44) | -1.33<br>(-1.54 to -1.11) | -1.53<br>(-1.65 to -1.42) | -1.75<br>(-1.91 to -1.58) | -1.31<br>(-1.42 to -1.20) |
| Sudan                            | -1.57<br>(-1.69 to -1.45) | -1.70<br>(-1.83 to -1.57) | -1.46<br>(-1.57 to -1.35) | -2.38<br>(-2.45 to -2.30) | -2.89<br>(-2.99 to -2.80) | -1.83<br>(-1.88 to -1.77) | -2.46<br>(-2.51 to -2.42) | -2.73<br>(-2.79 to -2.67) | -2.19<br>(-2.23 to -2.15) |
| Suriname                         | -0.52<br>(-0.57 to -0.47) | -0.41<br>(-0.46 to -0.36) | -0.61<br>(-0.66 to -0.56) | -0.91<br>(-1.07 to -0.75) | -0.76<br>(-0.91 to -0.61) | -1.04<br>(-1.23 to -0.86) | -1.02<br>(-1.17 to -0.87) | -0.97<br>(-1.10 to -0.83) | -1.07<br>(-1.25 to -0.88) |
| Sweden                           | -1.34<br>(-1.44 to -1.24) | -1.24<br>(-1.33 to -1.16) | -1.41<br>(-1.53 to -1.30) | -2.67<br>(-2.97 to -2.37) | -2.19<br>(-2.49 to -1.89) | -2.91<br>(-3.23 to -2.59) | -2.92<br>(-3.13 to -2.70) | -2.57<br>(-2.78 to -2.36) | -3.16<br>(-3.41 to -2.90) |
| Switzerland                      | -0.93<br>(-1.20 to -0.66) | -0.78<br>(-0.99 to -0.57) | -1.01<br>(-1.32 to -0.69) | -2.04<br>(-2.18 to -1.90) | -1.51<br>(-1.70 to -1.31) | -2.34<br>(-2.49 to -2.20) | -2.61<br>(-2.72 to -2.50) | -2.26<br>(-2.41 to -2.12) | -2.85<br>(-2.97 to -2.74) |
| Syrian Arab<br>Republic          | -1.25<br>(-1.37 to -1.13) | -1.15<br>(-1.28 to -1.03) | -1.33<br>(-1.46 to -1.20) | -2.35<br>(-2.68 to -2.02) | -2.32<br>(-2.64 to -2.00) | -2.33<br>(-2.67 to -1.98) | -2.69<br>(-3.03 to -2.34) | -2.61<br>(-2.95 to -2.28) | -2.73<br>(-3.10 to -2.36) |
| Taiwan<br>(Province of<br>China) | -1.97<br>(-2.11 to -1.83) | -2.11<br>(-2.26 to -1.96) | -1.86<br>(-1.98 to -1.74) | -3.06<br>(-3.44 to -2.67) | -1.47<br>(-1.98 to -0.95) | -2.69<br>(-3.04 to -2.34) | -3.69<br>(-3.97 to -3.40) | -3.92<br>(-4.24 to -3.60) | -3.43<br>(-3.67 to -3.19) |
| Tajikistan                       | -0.40<br>(-0.47 to -0.34) | -0.22<br>(-0.34 to -0.10) | -0.60<br>(-0.66 to -0.54) | -2.27<br>(-2.68 to -1.86) | -1.40<br>(-1.99 to -0.80) | -3.03<br>(-3.36 to -2.70) | -1.72<br>(-2.01 to -1.44) | -1.15<br>(-1.51 to -0.79) | -2.32<br>(-2.55 to -2.10) |
| Thailand                         | 0.54<br>(0.44 to 0.63)    | 0.60<br>(0.49 to 0.72)    | 0.42<br>(0.34 to 0.49)    | -1.17<br>(-1.67 to -0.67) | -2.43<br>(-2.59 to -2.27) | -1.09<br>(-1.53 to -0.65) | -1.29<br>(-1.65 to -0.93) | -1.22<br>(-1.65 to -0.78) | -1.42<br>(-1.72 to -1.13) |

|                        |                           |                           |                           |                           |                           |                           |                           |                           |                           |
|------------------------|---------------------------|---------------------------|---------------------------|---------------------------|---------------------------|---------------------------|---------------------------|---------------------------|---------------------------|
| Timor-Leste            | -1.69<br>(-1.83 to -1.54) | -1.51<br>(-1.65 to -1.38) | -1.90<br>(-2.06 to -1.74) | -2.66<br>(-2.88 to -2.44) | -0.56<br>(-0.76 to -0.35) | -2.96<br>(-3.25 to -2.67) | -2.19<br>(-2.39 to -1.98) | -1.83<br>(-2 to -1.66)    | -2.69<br>(-2.95 to -2.42) |
| Togo                   | -0.51<br>(-0.58 to -0.43) | -0.51<br>(-0.59 to -0.43) | -0.52<br>(-0.59 to -0.44) | -0.72<br>(-0.93 to -0.51) | 0.07<br>(-0.15 to 0.29)   | -0.90<br>(-1.10 to -0.69) | -0.72<br>(-0.97 to -0.48) | -0.49<br>(-0.73 to -0.26) | -0.97<br>(-1.22 to -0.72) |
| Tokelau                | -0.40<br>(-0.44 to -0.37) | -0.27<br>(-0.33 to -0.20) | -0.50<br>(-0.54 to -0.47) | -0.09<br>(-0.23 to 0.05)  | -2.40<br>(-2.53 to -2.27) | -0.27<br>(-0.36 to -0.18) | -0.21<br>(-0.35 to -0.07) | -0.05<br>(-0.27 to 0.17)  | -0.42<br>(-0.50 to -0.35) |
| Tonga                  | -1.20<br>(-1.29 to -1.12) | -1.01<br>(-1.08 to -0.94) | -1.29<br>(-1.39 to -1.20) | -2.29<br>(-2.43 to -2.15) | -0.89<br>(-0.96 to -0.81) | -2.23<br>(-2.37 to -2.08) | -1.84<br>(-2.09 to -1.60) | -1.94<br>(-2.14 to -1.73) | -1.81<br>(-2.10 to -1.51) |
| Trinidad and<br>Tobago | -0.76<br>(-0.82 to -0.70) | -0.56<br>(-0.61 to -0.50) | -0.95<br>(-1.03 to -0.87) | -0.77<br>(-0.85 to -0.69) | -0.91<br>(-1.08 to -0.73) | -0.80<br>(-0.92 to -0.68) | -0.75<br>(-0.81 to -0.70) | -0.61<br>(-0.67 to -0.56) | -0.92<br>(-1.00 to -0.84) |
| Tunisia                | -0.80<br>(-0.85 to -0.76) | -0.62<br>(-0.65 to -0.58) | -0.95<br>(-1.01 to -0.89) | -1.24<br>(-1.42 to -1.06) | -2.45<br>(-2.51 to -2.40) | -1.57<br>(-1.77 to -1.38) | -1.19<br>(-1.38 to -0.99) | -0.83<br>(-1.02 to -0.65) | -1.53<br>(-1.76 to -1.31) |
| Turkey                 | -1.26<br>(-1.34 to -1.17) | -1.23<br>(-1.32 to -1.14) | -1.26<br>(-1.35 to -1.17) | -2.10<br>(-2.14 to -2.06) | -3.43<br>(-3.80 to -3.06) | -1.77<br>(-1.83 to -1.71) | -2.22<br>(-2.26 to -2.17) | -2.38<br>(-2.43 to -2.32) | -2.09<br>(-2.15 to -2.03) |
| Turkmenistan           | 1.04<br>(0.93 – 1.15)     | 1.28<br>(1.15 – 1.42)     | 0.73<br>(0.64 – 0.81)     | 1.43<br>(1.09 – 1.77)     | 1.93<br>(1.57 – 2.28)     | 0.75<br>(0.41 – 1.10)     | 1.26<br>(0.95 – 1.57)     | 1.78<br>(1.45 – 2.12)     | 0.49<br>(0.19 – 0.79)     |
| Tuvalu                 | -0.78<br>(-0.84 to -0.71) | -0.56<br>(-0.63 to -0.50) | -0.91<br>(-0.99 to -0.84) | -1.85<br>(-1.98 to -1.73) | -1.80<br>(-1.93 to -1.67) | -1.88<br>(-2.00 to -1.77) | -1.71<br>(-1.83 to -1.59) | -1.66<br>(-1.78 to -1.54) | -1.86<br>(-1.98 to -1.74) |
| Uganda                 | -0.63<br>(-0.70 to -0.56) | -0.60<br>(-0.68 to -0.52) | -0.57<br>(-0.65 to -0.50) | -2.22<br>(-2.41 to -2.02) | -2.14<br>(-2.32 to -1.97) | -1.85<br>(-2.12 to -1.58) | -1.97<br>(-2.17 to -1.77) | -1.97<br>(-2.16 to -1.77) | -1.67<br>(-1.93 to -1.41) |
| Ukraine                | -0.33<br>(-0.40 to -0.26) | 0.03<br>(-0.06 to 0.11)   | -0.79<br>(-0.86 to -0.72) | -1.39<br>(-1.53 to -1.24) | -0.79<br>(-0.90 to -0.69) | -1.96<br>(-2.17 to -1.76) | -0.80<br>(-0.92 to -0.67) | -0.20<br>(-0.33 to -0.07) | -1.51<br>(-1.68 to -1.34) |

|                                              |                           |                           |                           |                           |                           |                           |                           |                           |                           |
|----------------------------------------------|---------------------------|---------------------------|---------------------------|---------------------------|---------------------------|---------------------------|---------------------------|---------------------------|---------------------------|
| United Arab Emirates                         | -1.20<br>(-1.31 to -1.09) | -1.10<br>(-1.19 to -1.01) | -1.25<br>(-1.35 to -1.15) | -0.22<br>(-0.72 to 0.28)  | -1.51<br>(-2.04 to -0.98) | 1.98<br>(1.44 to 2.53)    | -1.19<br>(-1.55 to -0.84) | -2.02<br>(-2.41 to -1.63) | 0.29<br>(-0.08 to 0.66)   |
| United Kingdom                               | -1.35<br>(-1.47 to -1.22) | -1.24<br>(-1.36 to -1.13) | -1.38<br>(-1.50 to -1.26) | -2.02<br>(-2.20 to -1.84) | -1.52<br>(-1.69 to -1.34) | -2.28<br>(-2.47 to -2.09) | -2.62<br>(-2.78 to -2.45) | -2.31<br>(-2.46 to -2.15) | -2.81<br>(-2.98 to -2.63) |
| United Republic of Tanzania                  | -0.68<br>(-0.73 to -0.62) | -0.83<br>(-0.90 to -0.75) | -0.48<br>(-0.51 to -0.44) | -1.71<br>(-1.79 to -1.63) | -2.26<br>(-2.39 to -2.14) | -0.70<br>(-0.78 to -0.62) | -1.64<br>(-1.74 to -1.53) | -2.07<br>(-2.21 to -1.93) | -0.90<br>(-0.96 to -0.83) |
| United States of America                     | -0.48<br>(-0.67 to -0.29) | -0.10<br>(-0.29 to 0.10)  | -0.71<br>(-0.90 to -0.53) | -0.46<br>(-0.61 to -0.30) | 0.23<br>(0.04 to 0.43)    | -0.85<br>(-1.01 to -0.70) | -0.91<br>(-1.01 to -0.82) | -0.42<br>(-0.52 to -0.32) | -1.22<br>(-1.34 to -1.11) |
| United States Virgin Islands                 | -0.82<br>(-0.88 to -0.76) | -0.32<br>(-0.37 to -0.26) | -1.14<br>(-1.22 to -1.07) | -2.49<br>(-2.65 to -2.33) | -1.73<br>(-1.91 to -1.55) | -3.13<br>(-3.32 to -2.94) | -2.22<br>(-2.37 to -2.07) | -1.57<br>(-1.76 to -1.37) | -2.82<br>(-2.97 to -2.68) |
| Uruguay                                      | -1.06<br>(-1.13 to -0.98) | -1.20<br>(-1.26 to -1.14) | -0.99<br>(-1.08 to -0.90) | -1.79<br>(-1.91 to -1.66) | -2.05<br>(-2.20 to -1.91) | -1.62<br>(-1.76 to -1.48) | -2.16<br>(-2.29 to -2.03) | -2.42<br>(-2.61 to -2.24) | -1.99<br>(-2.11 to -1.87) |
| Uzbekistan                                   | 0.18<br>(0.11 - 0.26)     | 0.18<br>(0.13 - 0.23)     | 0.15<br>(0.05 - 0.24)     | 1.96<br>(1.03 - 2.90)     | 1.93<br>(1.03 - 2.84)     | 1.84<br>(0.83 - 2.85)     | 1.14<br>(0.49 - 1.80)     | 1.38<br>(0.74 - 2.03)     | 0.73<br>(0.04 - 1.43)     |
| Vanuatu                                      | 0.01<br>(-0.02 to 0.05)   | 0.24<br>(0.21 - 0.28)     | -0.28<br>(-0.32 to -0.23) | -1.04<br>(-1.12 to -0.95) | -0.97<br>(-1.04 to -0.91) | -1.19<br>(-1.29 to -1.09) | -0.87<br>(-0.94 to -0.79) | -0.76<br>(-0.82 to -0.70) | -1.01<br>(-1.11 to -0.91) |
| Venezuela (Bolivarian Republic of Venezuela) | -0.47<br>(-0.56 to -0.38) | -0.36<br>(-0.41 to -0.30) | -0.54<br>(-0.66 to -0.43) | -0.04<br>(-0.18 to 0.10)  | 0.13<br>(-0.01 to 0.27)   | -0.18<br>(-0.36 to 0)     | -0.34<br>(-0.50 to -0.18) | -0.17<br>(-0.31 to -0.03) | -0.47<br>(-0.68 to -0.26) |
| Viet Nam                                     | -0.91<br>(-0.99 to -0.82) | -0.91<br>(-0.99 to -0.83) | -0.94<br>(-1.03 to -0.85) | -1.49<br>(-1.55 to -1.42) | -1.71<br>(-1.76 to -1.67) | -1.39<br>(-1.48 to -1.29) | -1.41<br>(-1.50 to -1.33) | -1.57<br>(-1.63 to -1.51) | -1.36<br>(-1.48 to -1.24) |

|          |                           |                           |                           |                           |                           |                           |                           |                           |                           |
|----------|---------------------------|---------------------------|---------------------------|---------------------------|---------------------------|---------------------------|---------------------------|---------------------------|---------------------------|
| Yemen    | -0.86<br>(-0.95 to -0.77) | -0.93<br>(-1.02 to -0.83) | -0.88<br>(-0.96 to -0.80) | -1.50<br>(-1.67 to -1.33) | -2.00<br>(-2.22 to -1.79) | -1.17<br>(-1.32 to -1.02) | -1.73<br>(-1.89 to -1.58) | -2.02<br>(-2.21 to -1.84) | -1.52<br>(-1.65 to -1.39) |
| Zambia   | -0.35<br>(-0.41 to -0.30) | -0.05<br>(-0.10 to 0.01)  | -0.67<br>(-0.74 to -0.61) | -1.14<br>(-1.33 to -0.94) | -1.03<br>(-1.30 to -0.77) | -1.03<br>(-1.17 to -0.89) | -1.00<br>(-1.19 to -0.82) | -0.89<br>(-1.16 to -0.61) | -1.08<br>(-1.21 to -0.95) |
| Zimbabwe | 0.98<br>(0.84 – 1.11)     | 0.81<br>(0.66 – 0.96)     | 1.15<br>(0.99 – 1.31)     | 2.18<br>(1.57 – 2.78)     | 1.64<br>(1.18 – 2.09)     | 2.85<br>(2.02 – 3.68)     | 2.38<br>(1.75 – 3.01)     | 1.98<br>(1.47 – 2.50)     | 3.00<br>(2.16 – 3.84)     |

---

*ASIR* age-standardized incidence rate, *ASMR* age-standardized mortality rate, *ASDR* age-standardized disability-adjusted life-year rate, *EAPC* estimated annual percentage change, *CI* confidence interval

**Table S9** Attributable DALYs and age-standardized DALY rate by subarachnoid hemorrhage (SAH) risk factors in 2021

| Risk factor                         | DALYs/10,000 (95% UI)       |                             |                             | ASDR/100,000 persons (95% UI) |                           |                          |
|-------------------------------------|-----------------------------|-----------------------------|-----------------------------|-------------------------------|---------------------------|--------------------------|
|                                     | Both                        | Male                        | Female                      | Both                          | Male                      | Female                   |
| All risk factor                     | 772.02<br>(651.89 – 911.45) | 410.94<br>(324.48 – 527.11) | 361.08<br>(300.48 – 425.34) | 89.60<br>(75.68 – 105.80)     | 99.18<br>(78.49 – 127.01) | 80.19<br>(66.73 – 94.57) |
| Environmental or occupational risks |                             |                             |                             |                               |                           |                          |
| Particulate matter pollution        | 265.15<br>(199.42 – 350.57) | 140.89<br>(96.62 – 206.10)  | 124.26<br>(95.64 – 164.79)  | 30.73<br>(23.13 – 40.64)      | 33.91<br>(23.29 – 49.37)  | 27.70<br>(21.33 – 36.71) |
| High temperature                    | 12.07<br>(2.26 – 26.55)     | 6.74<br>(1.24 – 15.44)      | 5.33<br>(1.04 – 12.10)      | 1.43<br>(0.27 – 3.14)         | 1.64<br>(0.30 – 3.74)     | 1.23<br>(0.25 – 2.78)    |
| Low temperature                     | 47.69<br>(39.27 – 57.66)    | 24.85<br>(19.65 – 31.35)    | 22.84<br>(19.07 – 27.76)    | 5.60<br>(4.62 – 6.77)         | 6.13<br>(4.86 – 7.69)     | 5.08<br>(4.24 – 6.17)    |
| Lead exposure                       | 67.35<br>(-8.95 to 149.46)  | 38.42<br>(-5.18 to 87.92)   | 28.93<br>(-3.77 to 66.13)   | 7.76<br>(-1.03 to 17.25)      | 9.29<br>(-1.25 to 21.11)  | 6.37<br>(-0.83 to 14.58) |
| Behavioral risks                    |                             |                             |                             |                               |                           |                          |
| Tobacco                             |                             |                             |                             |                               |                           |                          |
| Smoking                             | 156.74<br>(127.76 – 189.74) | 128.68<br>(102.79 – 160.42) | 28.06<br>(23.72 – 33.44)    | 18.07<br>(14.72 – 21.86)      | 30.41<br>(24.29 – 37.81)  | 6.31<br>(5.34 – 7.53)    |
| Secondhand smoke                    | 50.16<br>(33.62 – 67.34)    | 21.52<br>(13.58 – 30.83)    | 28.63<br>(19.24 – 39.43)    | 5.84<br>(3.91 – 7.85)         | 5.16<br>(3.25 – 7.36)     | 6.48<br>(4.35 – 8.93)    |

### Dietary risks

|                        |                               |                              |                              |                            |                            |                            |
|------------------------|-------------------------------|------------------------------|------------------------------|----------------------------|----------------------------|----------------------------|
| Diet high in red meat  | -75.31<br>(-310.07 to 105.58) | -39.22<br>(-161.71 to 54.35) | -36.09<br>(-148.10 to 49.40) | -8.77<br>(-36.12 to 12.25) | -9.31<br>(-38.32 to 12.86) | 4.61<br>(-1.33 to 9.91)    |
| Diet high in sodium    | 97.60<br>(22.38 – 224.36)     | 58.62<br>(15.38 – 130.80)    | 38.98<br>(6.96 – 96.26)      | 11.19<br>(2.54 – 25.86)    | 13.98<br>(3.62 – 31.27)    | 1.56<br>(-0.16 to 3.29)    |
| Diet low in fiber      | 42.89<br>(-12.72 to 91.25)    | 22.80<br>(-6.79 to 50.06)    | 20.08<br>(-5.78 to 43.34)    | 5.03<br>(-1.50 to 10.68)   | 5.43<br>(-1.62 to 11.90)   | 8.56<br>(1.52 to 21.25)    |
| Diet low in fruits     | 96.97<br>(-6.90 to 182.02)    | 52.51<br>(-3.51 to 103.08)   | 44.45<br>(-3.39 to 84.84)    | 11.29<br>(-0.80 to 21.15)  | 12.47<br>(-0.83 to 24.42)  | -8.22<br>(-33.86 to 11.24) |
| Diet low in vegetables | 15.52<br>(-1.63 to 32.52)     | 8.74<br>(-0.95 to 21.43)     | 6.78<br>(-0.70 to 14.30)     | 1.82<br>(-0.19 to 3.81)    | 2.08<br>(-0.23 to 5.10)    | 10.12<br>(-0.78 to 19.26)  |

### Metabolic risks

|                              |                             |                             |                             |                          |                          |                          |
|------------------------------|-----------------------------|-----------------------------|-----------------------------|--------------------------|--------------------------|--------------------------|
| High body mass index         | 52.97<br>(0.04 – 119.13)    | 22.72<br>(0.05 – 51.47)     | 30.25<br>(-0.49 – 67.11)    | 6.14<br>(0 – 13.85)      | 5.35<br>(0.01 – 12.19)   | 6.88<br>(-0.11 to 15.34) |
| High systolic blood pressure | 557.89<br>(404.92 – 706.24) | 288.50<br>(203.41 – 396.09) | 269.39<br>(195.49 – 339.64) | 64.58<br>(46.84 – 81.79) | 69.68<br>(49.26 – 95.18) | 59.38<br>(43.07 – 75.07) |

### Risks cluster

|                                     |                             |                             |                             |                          |                          |                          |
|-------------------------------------|-----------------------------|-----------------------------|-----------------------------|--------------------------|--------------------------|--------------------------|
| Environmental or occupational risks | 353.50<br>(264.48 – 458.64) | 188.90<br>(128.62 – 267.48) | 164.59<br>(125.28 – 209.95) | 41.05<br>(30.76 – 53.24) | 45.66<br>(31.25 – 64.55) | 36.67<br>(27.90 – 46.93) |
| Behavioral risks                    | 311.33<br>(207.91 – 432.03) | 204.54<br>(94.01 – 321.00)  | 107.18<br>(55.72 – 166.64)  | 35.96<br>(23.98 – 49.92) | 48.52<br>(34.40 – 67.23) | 24.02<br>(12.44 – 37.22) |



|                 |                             |                             |                             |                          |                          |                          |
|-----------------|-----------------------------|-----------------------------|-----------------------------|--------------------------|--------------------------|--------------------------|
| Metabolic risks | 568.15<br>(415.24 – 712.30) | 292.73<br>(205.40 – 399.32) | 275.41<br>(202.87 – 344.89) | 65.78<br>(48.06 – 82.57) | 70.69<br>(49.75 – 95.87) | 60.78<br>(44.72 – 76.31) |
|-----------------|-----------------------------|-----------------------------|-----------------------------|--------------------------|--------------------------|--------------------------|

---

*DALYs* disability-adjusted life-years, *ASDR* age-standardized disability-adjusted life-year rate, *UI* uncertainty interval

**Table S10** Attributable deaths and age-standardized deaths rate by subarachnoid hemorrhage (SAH) risk factors in 2021

| Risk factor                         | Deaths/1000 (95% UI)        |                             |                             | ASMR/100,000 persons (95% UI) |                         |                         |
|-------------------------------------|-----------------------------|-----------------------------|-----------------------------|-------------------------------|-------------------------|-------------------------|
|                                     | Both                        | Male                        | Female                      | Both                          | Male                    | Female                  |
| All risk factor                     | 263.31<br>(222.15 – 312.98) | 133.55<br>(104.18 – 171.73) | 129.76<br>(106.33 – 155.40) | 3.10<br>(2.60 – 3.69)         | 3.40<br>(2.67 – 4.35)   | 2.82<br>(2.31 – 3.38)   |
| Environmental or occupational risks |                             |                             |                             |                               |                         |                         |
| Particulate matter pollution        | 88.43<br>(65.26 – 116.47)   | 45.52<br>(30.32 – 66.43)    | 42.91<br>(32.43 – 57.60)    | 1.04<br>(0.76 – 1.36)         | 1.15<br>(0.77 – 1.67)   | 0.94<br>(0.71 – 1.26)   |
| High temperature                    | 3.89<br>(0.59 – 8.91)       | 2.09<br>(0.30 – 4.93)       | 1.80<br>(0.27 – 4.26)       | 0.05<br>(0.01 – 0.10)         | 0.05<br>(0.01 – 0.12)   | 0.04<br>(0.01 – 0.09)   |
| Low temperature                     | 19.66<br>(16.27 – 23.20)    | 9.48<br>(7.51 – 11.75)      | 10.17<br>(8.36 – 12.45)     | 0.23<br>(0.19 – 0.28)         | 0.25<br>(0.20 – 0.31)   | 0.22<br>(0.18 – 0.27)   |
| Lead exposure                       | 24.39<br>(-3.24 to 54.01)   | 13.61<br>(-1.82 to 31.11)   | 10.78<br>(-1.42 to 24.54)   | 0.29<br>(-0.04 to 0.63)       | 0.35<br>(-0.05 to 0.79) | 0.23<br>(-0.03 to 0.53) |
| Behavioral risks                    |                             |                             |                             |                               |                         |                         |
| Tobacco                             |                             |                             |                             |                               |                         |                         |
| Smoking                             | 45.07<br>(35.70 – 55.90)    | 37.09<br>(28.79 – 47.39)    | 7.98<br>(6.69 – 9.61)       | 0.52<br>(0.41 – 0.64)         | 0.91<br>(0.70 – 1.15)   | 0.18<br>(0.15 – 0.21)   |
| Secondhand smoke                    | 14.71<br>(9.78 – 19.92)     | 6.21<br>(3.83 – 8.83)       | 8.50<br>(5.61 – 11.85)      | 0.17<br>(0.11 – 0.23)         | 0.16<br>(0.10 – 0.22)   | 0.19<br>(0.12 – 0.26)   |

### Dietary risks

|                        |                             |                             |                              |                          |                          |                          |
|------------------------|-----------------------------|-----------------------------|------------------------------|--------------------------|--------------------------|--------------------------|
| Diet high in red meat  | -20.20<br>(-81.67 to 28.75) | -10.36<br>(-41.79 to 14.54) | -9.83<br>(-39.11 to 14.23)   | -0.24<br>(-0.95 to 0.34) | -0.25<br>(-1.01 to 0.35) | -0.22<br>(-0.87 to 0.31) |
| Diet high in sodium    | 33.46<br>(7.10 – 77.88)     | 19.64<br>(4.86 – 43.44)     | 13.82<br>(2.27 – 34.87)      | 0.39<br>(0.08 – 0.91)    | 0.49<br>(0.12 – 1.09)    | 0.30<br>(0.05 – 0.76)    |
| Diet low in fiber      | 11.25<br>(-3.17 to 24.64)   | 5.75<br>(-1.62 to 12.74)    | 5.50<br>(-1.54 to 12.13)     | 0.13<br>(-0.04 to 0.29)  | 0.14<br>(-0.04 to 0.31)  | 0.12<br>(-0.03 to 0.27)  |
| Diet low in fruits     | 26.51<br>(-1.76 to 51.15)   | 13.99<br>(-0.87 to 27.65)   | 12.52<br>(-0.89 to 24.09)    | 0.31<br>(-0.02 to 0.60)  | 0.34<br>(-0.02 to 0.67)  | 0.28<br>(-0.02 to 0.53)  |
| Diet low in vegetables | 3.99<br>(0.38 to 8.69)      | (- 2.18<br>(0.23 to 5.70)   | (- 12.52<br>(-0.89 to 24.09) | 0.05<br>(0 – 0.10)       | 0.05<br>(-0.01 to 0.14)  | 0.04<br>(0 – 0.09)       |

### Metabolic risks

|                              |                             |                           |                            |                       |                       |                       |
|------------------------------|-----------------------------|---------------------------|----------------------------|-----------------------|-----------------------|-----------------------|
| High body mass index         | 13.84<br>(0.01 – 30.82)     | 5.76<br>(0.01 – 13.29)    | 8.08<br>(-0.12 – 17.84)    | 0.16<br>(0 – 0.36)    | 0.14<br>(0 – 0.32)    | 0.18<br>(0 – 0.40)    |
| High systolic blood pressure | 196.71<br>(143.36 – 249.92) | 96.24<br>(68.20 – 130.83) | 100.47<br>(73.05 – 127.70) | 2.32<br>(1.69 – 2.94) | 2.46<br>(1.75 – 3.32) | 2.18<br>(1.58 – 2.76) |

### Risks cluster

|                                     |                            |                          |                          |                       |                       |                       |
|-------------------------------------|----------------------------|--------------------------|--------------------------|-----------------------|-----------------------|-----------------------|
| Environmental or occupational risks | 122.02<br>(90.20 – 157.47) | 62.83<br>(41.30 – 89.20) | 59.19<br>(44.31 – 75.36) | 1.43<br>(1.06 – 1.85) | 1.60<br>(1.06 – 2.27) | 1.29<br>(0.97 – 1.65) |
| Behavioral risks                    | 94.52<br>(60.01 – 136.87)  | 61.02<br>(41.72 – 85.66) | 33.50<br>(17.21 – 55.33) | 1.10<br>(0.69 – 1.59) | 1.51<br>(1.02 – 2.13) | 0.73<br>(0.38 – 1.21) |

|                 |                             |                           |                            |                       |                       |                       |
|-----------------|-----------------------------|---------------------------|----------------------------|-----------------------|-----------------------|-----------------------|
| Metabolic risks | 199.17<br>(146.29 – 252.06) | 97.25<br>(69.01 – 131.59) | 101.92<br>(74.81 – 129.03) | 2.34<br>(1.72 – 2.97) | 2.48<br>(1.77 – 3.35) | 2.21<br>(1.62 – 2.80) |
|-----------------|-----------------------------|---------------------------|----------------------------|-----------------------|-----------------------|-----------------------|

---

*ASMR* age-standardized mortality rate, *UI* uncertainty interval

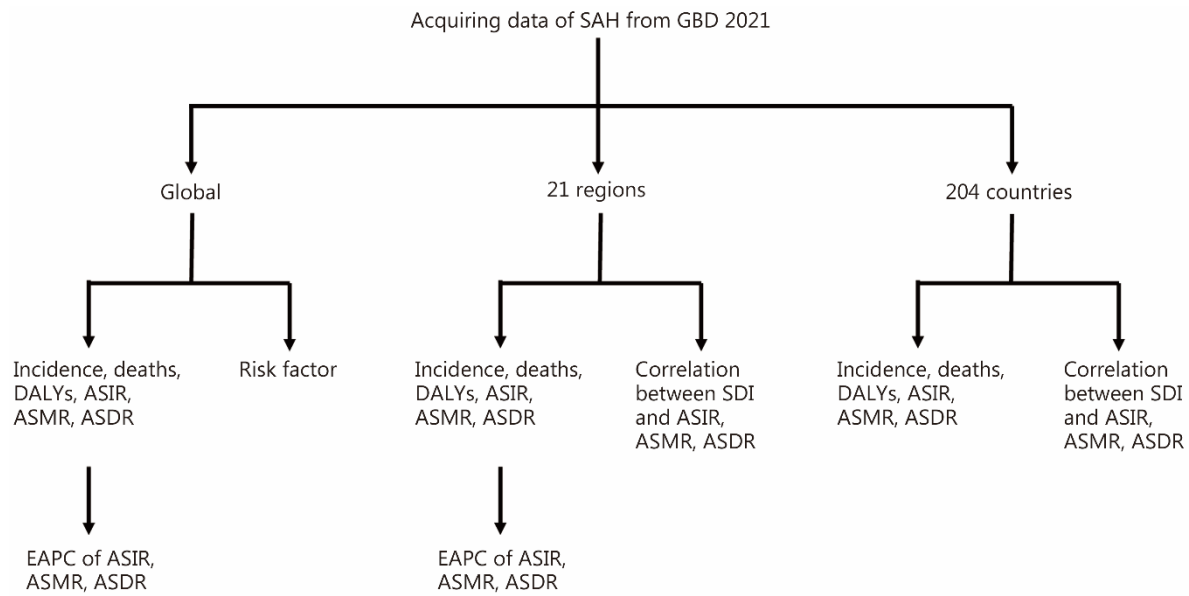

**Fig. S1** Flowcharting of the analysis process. GBD Global Burden of Disease Study, SAH subarachnoid hemorrhage, DALYs disability-adjusted life-years, ASIR age-standardized incidence rate, ASMR age-standardized mortality rate, ASDR age-standardized disability-adjusted life-year rate, EAPC estimated annual percentage change, SDI sociodemographic index

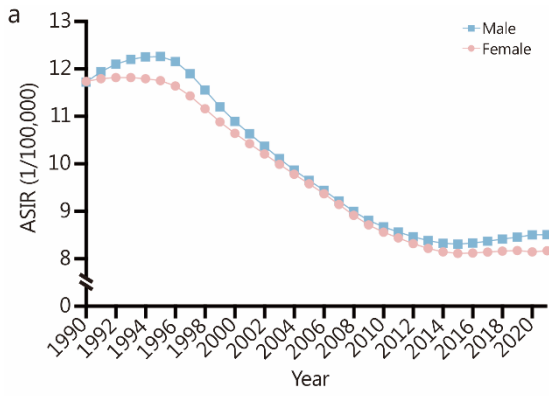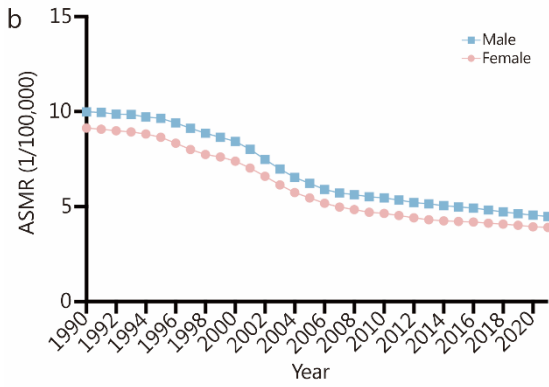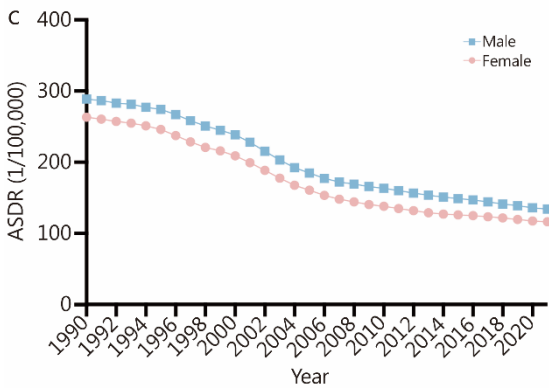

**Fig. S2** The age-standardized rates of SAH during 1990 – 2021 by sex. **a** The global ASIR of SAH during 1990 – 2021 by sex. **b** The global ASMR of SAH during 1990 – 2021 by sex. **c** The global ASDR of SAH during 1990 – 2021 by sex. ASIR age-standardized incidence rate, ASMR age-standardized deaths rate, ASDR age-standardized disability-adjusted life-year rate, SAH subarachnoid hemorrhage

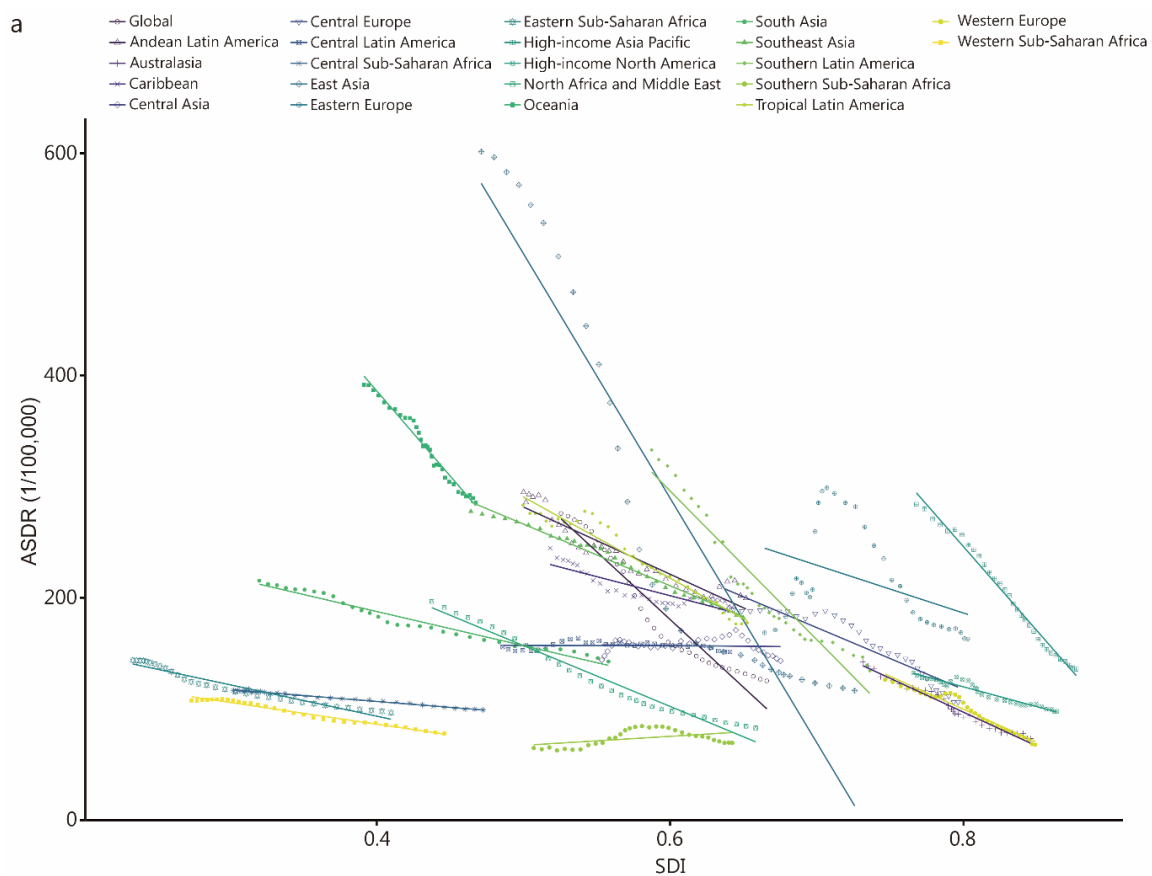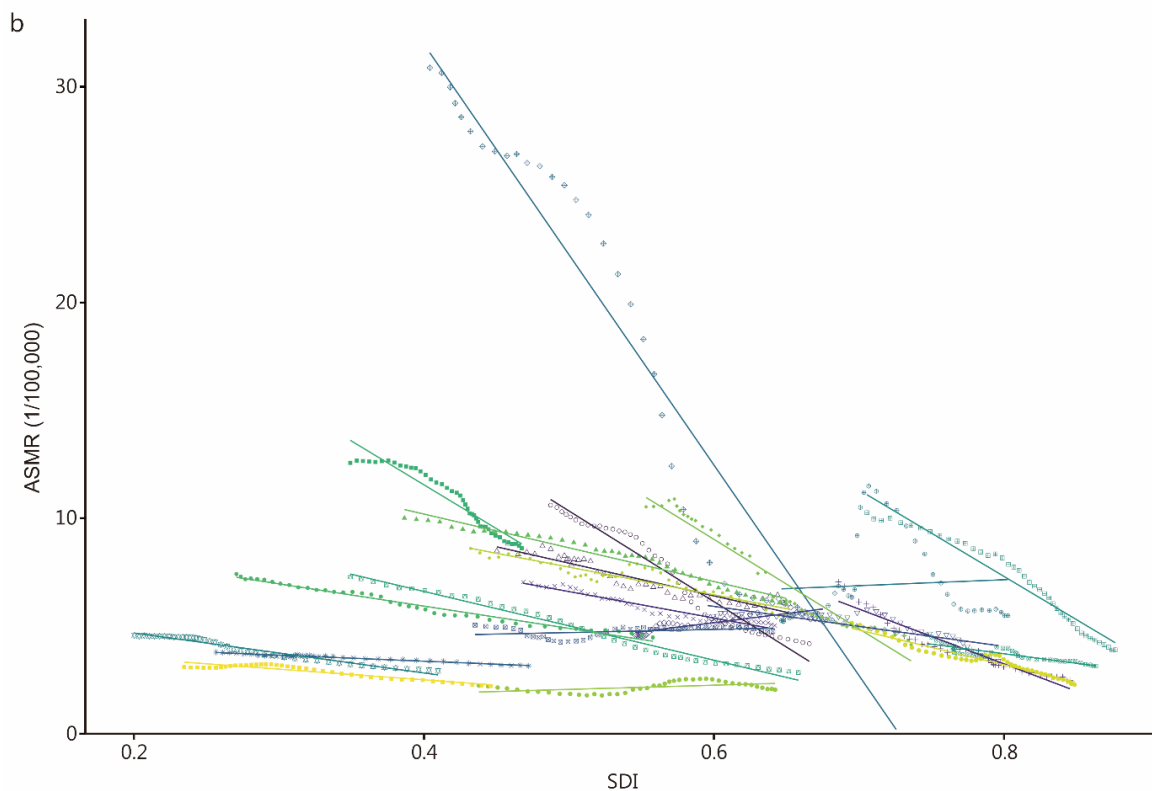

**Fig. S3** ASMR and ASDR of SAH for 21 regions and 204 countries and territories by SDI. **a** ASMR for 21 regions by SDI from 1990 to 2021. **b** ASDR for 21 regions by SDI from 1990 to 2021. ASMR age-standardized death rate, ASDR age-standardized disability-adjusted life-year rate, SDI sociodemographic index, SAH subarachnoid hemorrhage

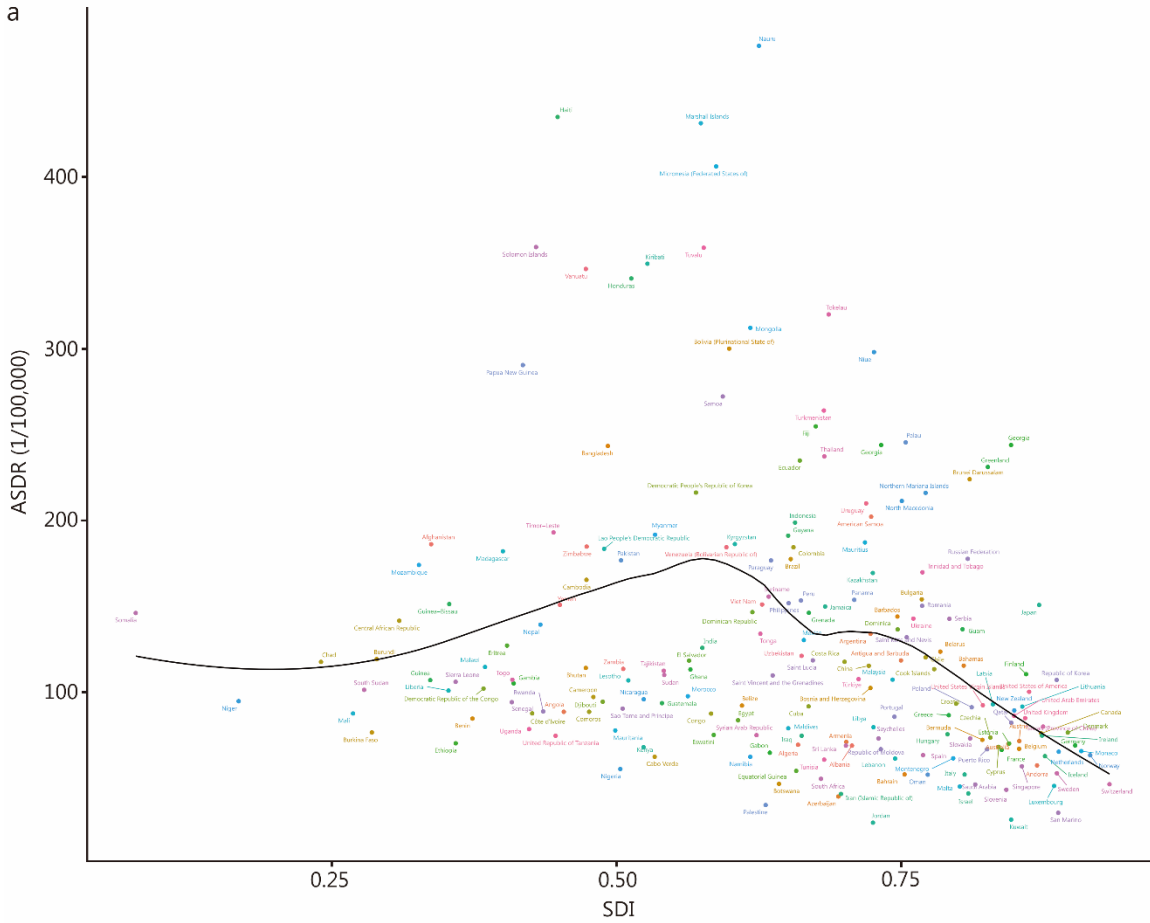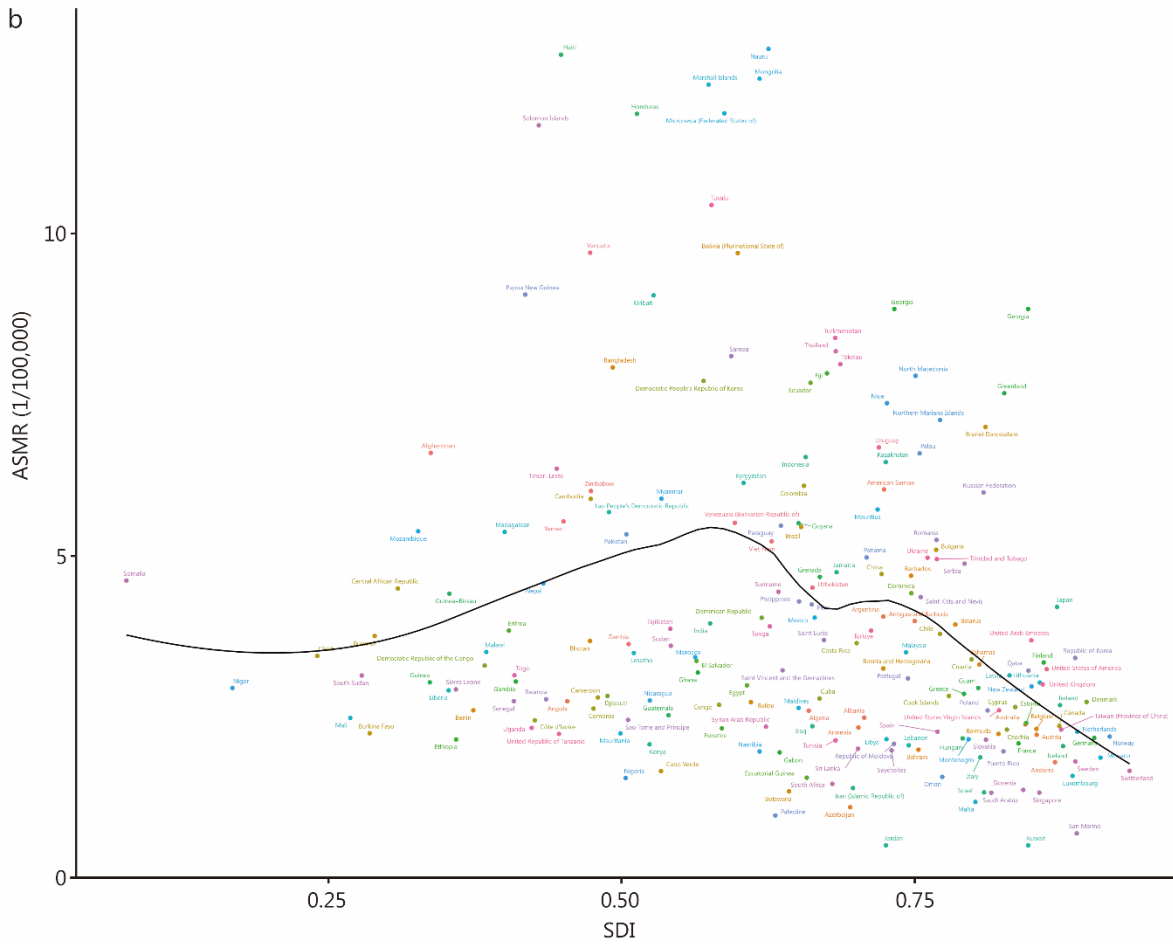



**Fig. S4** ASMR and ASDR of SAH for 204 countries and territories by SDI in 2021. **a** ASMR for 204 countries and territories by SDI in 2021. **b** ASDR for 204 countries and territories by SDI in 2021. ASMR age-standardized death rate, ASDR age-standardized disability-adjusted life-year rate, SDI sociodemographic index, SAH subarachnoid hemorrhage

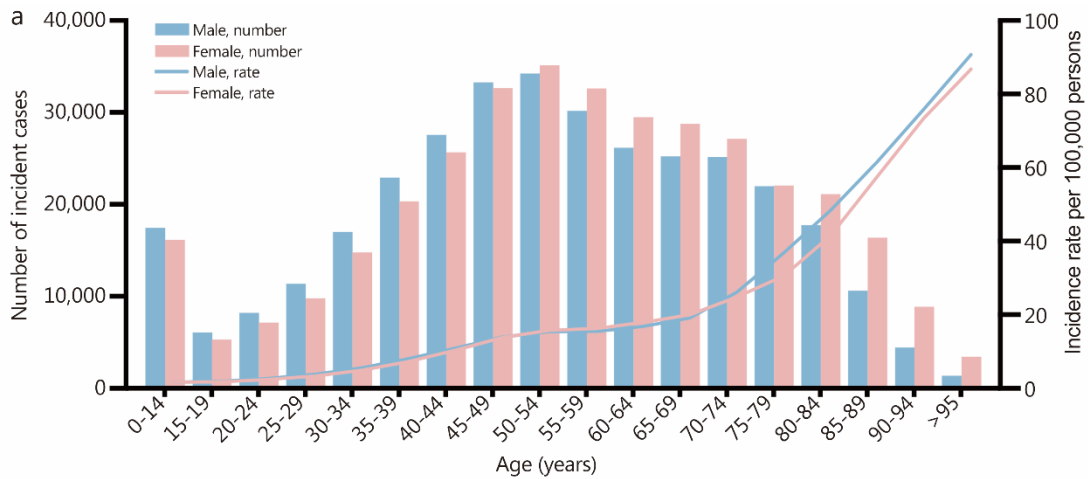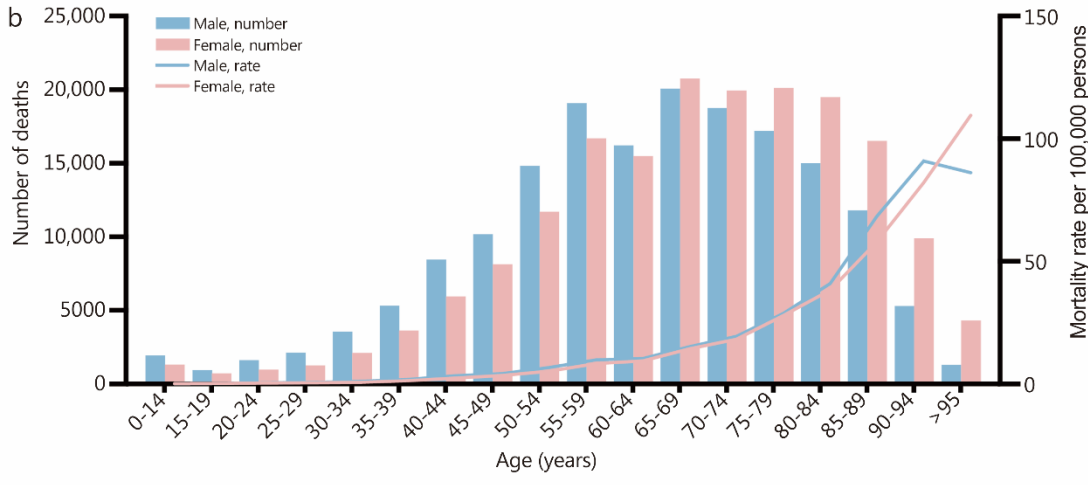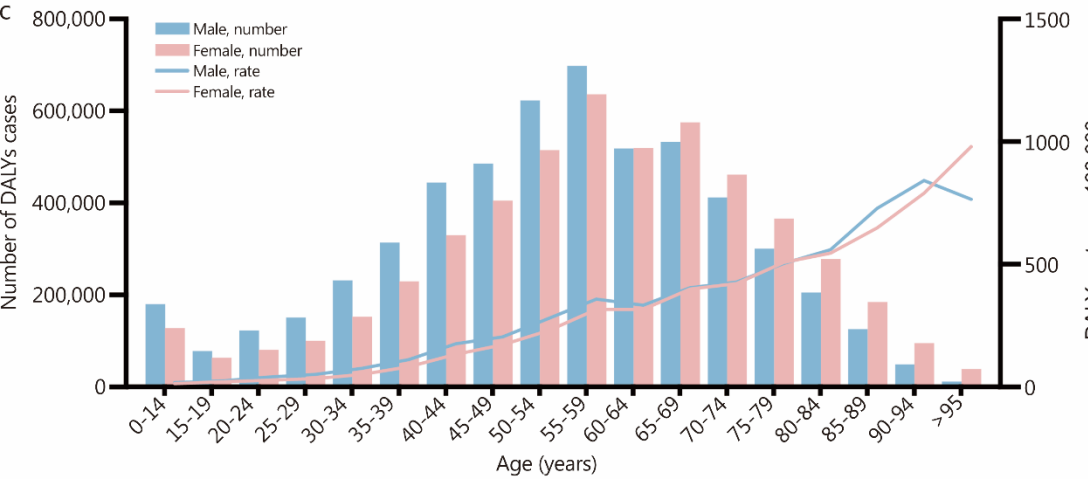

**Fig. S5** The global incidence, number of deaths, and DALYs due to SAH by age and sex. **a** The number and rate of incidence of SAH in 2021 by sex and age. **b** The number and rate of deaths of SAH in 2021 by sex and age. **c** The number and rate of DALYs of SAH in 2021 by sex and age. DALYs disability-adjusted life-years, SAH subarachnoid hemorrhage

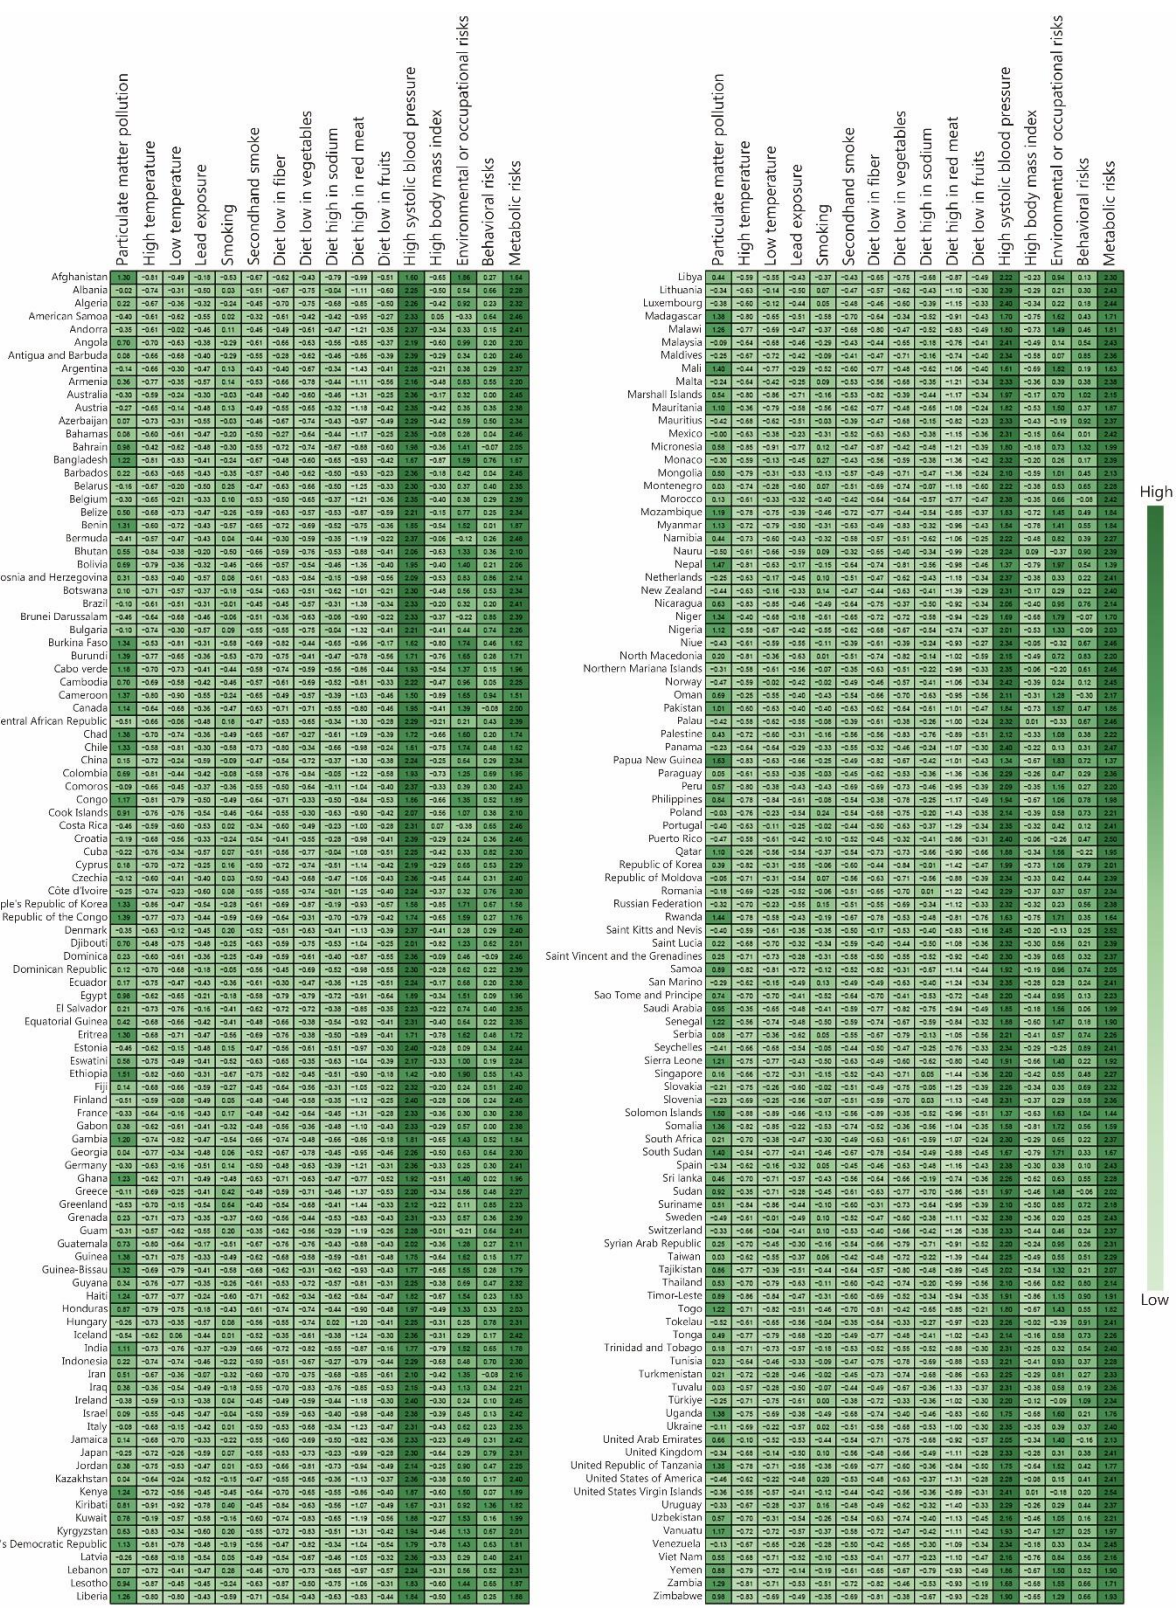

**Fig. S6** Attributable age-standardized death rate by SAH risk factors in 204 regions or countries in 2021. The darker the green color means the higher the value. SAH subarachnoid hemorrhage
